# Supplementary material
Source: Royal Society of Chemistry journal article supplement (doi:10.1039/d6dt01126h)
Supplement: d6dt01126h1.pdf [file d6dt01126h1.pdf]

# Supporting Information

## Understanding the Reactivity and Activation Barrier Origins in the Cycloaddition of Triplet Pnictinidenes with Phenylacetylene

Zheng-Feng Zhang<sup>1</sup> and Ming-Der Su<sup>1,2\*</sup>

<sup>1</sup>Department of Applied Chemistry, National Chiayi University, Chiayi 60004,  
Taiwan

<sup>2</sup>Department of Medicinal and Applied Chemistry, Kaohsiung Medical University,  
Kaohsiung 80708, Taiwan

\*E-mail: [midesu@mail.ncyu.edu.tw](mailto:midesu@mail.ncyu.edu.tw)

---

**Content:**

|                                                                                 |         |
|---------------------------------------------------------------------------------|---------|
| <b>Table SA.</b> Total number of atoms and basis functions -----                |         |
| S3                                                                              |         |
| <b>Table SB.</b> The computed energies for the intersystem crossing points----- | S3      |
| <b>Figure S1.</b> Optimized structures for triplet pnictinidenes -----          | S4      |
| <b>Figure S2.</b> Optimized structures for singlet pnictinidenes -----          | S5      |
| <b>Tables S1-S31</b> Cartesian coordinates of the stationary points-----        | S6-S243 |

**Table SA.** The total number of atoms and basis functions (M06-2X-D3/def2-SVP) involved in these molecular systems is summarized in the table. As shown therein, for instance, the **[Bi-T/S]** system comprises 188 atoms and 1723 basis functions, representing a computationally demanding system. Even at the def2-SVP level, the calculations are already computationally intensive, and the use of larger basis sets, such as def2-TZVP, would result in a prohibitive increase in computational cost.

=====

PhC≡CH pathway (188 atom numbers):

N: 1705 basis functions

P: 1709 basis functions

As: 1717 basis functions

Sb: 1723 basis functions

Bi: 1723 basis functions

=====

**Table SB.** The computed energies for the intersystem crossing points, denoted as **[G15-T/S-]**.

| <b>Crossing Points</b> | <b>Triplet state (Hartree)</b> | <b>Singlet state (Hartree)</b> |
|------------------------|--------------------------------|--------------------------------|
| <b>[N-T/S]</b>         | -3313.9101064200               | -3313.9101097400               |
| <b>[P-T/S]</b>         | -3600.4496057800               | -3600.4496070600               |
| <b>[As-T/S]</b>        | -5494.8427430300               | -5494.8427412300               |
| <b>[Sb-T/S]</b>        | -3499.3968079600               | -3499.3968222600               |
| <b>[Bi-T/S]</b>        | -3473.7131809100               | -3473.7131739400               |

**Figure S1.** Optimized structures at the M06-2X-D3/def2-SVP level (bond lengths in Å) for the triplet ground-state pnictinidene **[G15-Rea]<sup>3</sup>**.

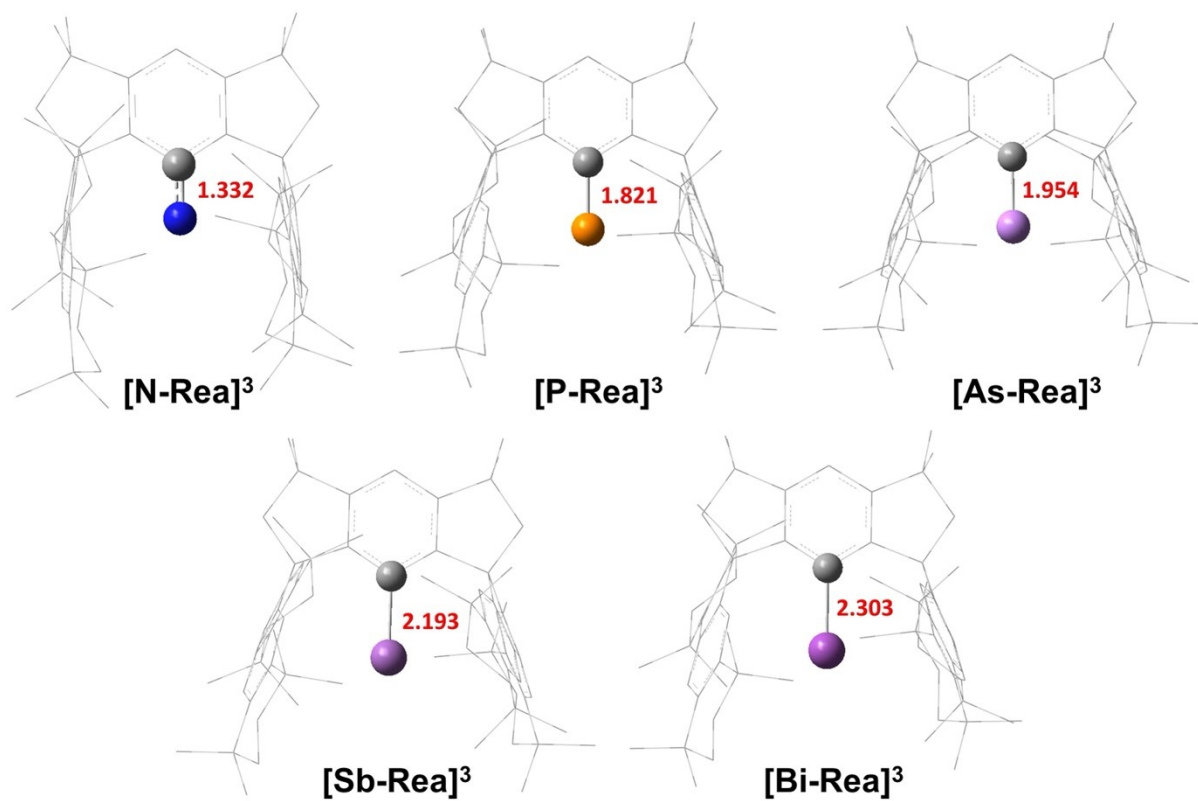

**Figure S2.** Optimized structures at the M06-2X-D3/def2-SVP level (bond lengths in Å) for the singlet pnictinidene [G15-Rea]<sup>1</sup>.

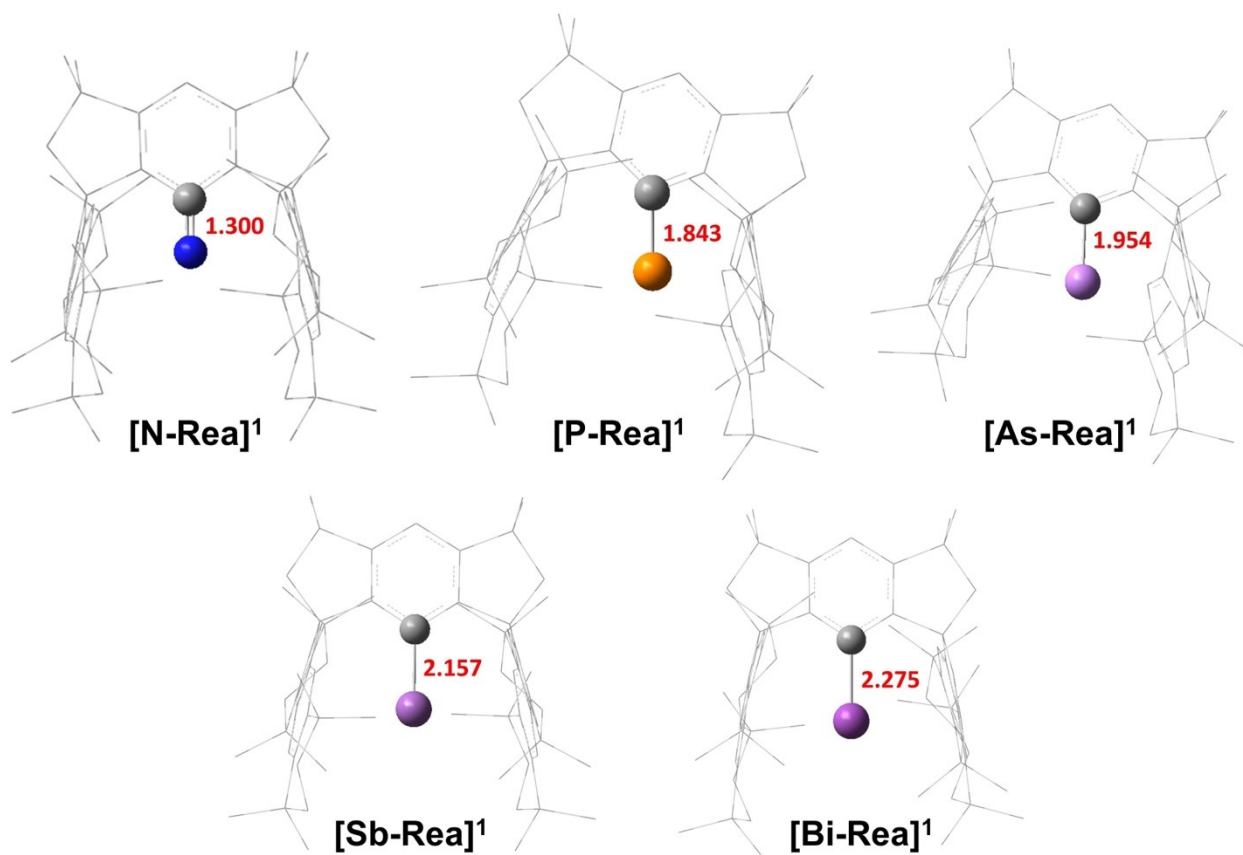

(All were calculated at the M06-2X-D3/def2-SVP level of theory)

**Table S1**

**[N-Rea]<sup>3</sup>**

E : -2848.75711678 Hartree

G : -2847.423458 Hartree

---

| Atomic<br>Number | Coordinates (Angstroms) |           |          |
|------------------|-------------------------|-----------|----------|
|                  | X                       | Y         | Z        |
| 7                | 0.000002                | -0.000017 | 0.941781 |
| 6                | -0.000469               | -0.000237 | 2.274093 |
| 6                | 1.200503                | -0.178854 | 3.028902 |
| 6                | -1.201978               | 0.178129  | 3.028106 |
| 6                | 2.585937                | -0.379712 | 2.445658 |
| 6                | 1.199435                | -0.128524 | 4.413344 |
| 6                | -2.586993               | 0.379185  | 2.443937 |
| 6                | -1.201899               | 0.127369  | 4.412534 |
| 6                | 3.496819                | -0.169908 | 3.691280 |
| 6                | 2.779645                | 0.579336  | 1.279116 |
| 6                | 2.745196                | -1.728099 | 1.740491 |
| 6                | 2.610644                | -0.205448 | 4.975950 |
| 6                | -0.001485               | -0.000682 | 5.127699 |
| 6                | -3.498765               | 0.168921  | 3.688829 |

|   |           |           |           |
|---|-----------|-----------|-----------|
| 6 | -2.745735 | 1.727839  | 1.739164  |
| 6 | -2.779887 | -0.579422 | 1.276902  |
| 6 | -2.613515 | 0.204061  | 4.974148  |
| 1 | 4.298012  | -0.921576 | 3.725562  |
| 1 | 3.980397  | 0.814445  | 3.607245  |
| 6 | 2.947430  | -0.110425 | 0.072806  |
| 6 | 2.571636  | 1.943954  | 1.274958  |
| 6 | 2.977979  | -1.550825 | 0.367065  |
| 6 | 2.691431  | -3.006016 | 2.264109  |
| 6 | 2.900570  | 1.008928  | 5.866548  |
| 6 | 2.813177  | -1.486184 | 5.795369  |
| 1 | -0.001867 | -0.000845 | 6.221465  |
| 1 | -4.300003 | 0.920555  | 3.722793  |
| 1 | -3.982250 | -0.815417 | 3.604108  |
| 6 | -2.977563 | 1.551082  | 0.365508  |
| 6 | -2.692282 | 3.005560  | 2.263292  |
| 6 | -2.946831 | 0.110790  | 0.070730  |
| 6 | -2.571936 | -1.944046 | 1.272390  |
| 6 | -2.904020 | -1.010635 | 5.864123  |
| 6 | -2.816702 | 1.484506  | 5.793857  |
| 6 | 2.903091  | 0.581335  | -1.129237 |
| 6 | 2.467928  | 2.651465  | 0.066764  |
| 1 | 2.385026  | 2.457763  | 2.221859  |
| 6 | 3.160683  | -2.655124 | -0.452327 |

|   |           |           |           |
|---|-----------|-----------|-----------|
| 6 | 2.891184  | -4.138179 | 1.451161  |
| 1 | 2.494954  | -3.142018 | 3.327749  |
| 1 | 2.722675  | 1.946212  | 5.318799  |
| 1 | 2.259248  | 1.007942  | 6.761112  |
| 1 | 3.949118  | 0.996978  | 6.201743  |
| 1 | 2.133491  | -1.504435 | 6.660894  |
| 1 | 3.845835  | -1.543809 | 6.171696  |
| 1 | 2.614877  | -2.385673 | 5.196889  |
| 6 | -3.159661 | 2.655693  | -0.453599 |
| 6 | -2.891459 | 4.138031  | 1.450631  |
| 1 | -2.496509 | 3.141153  | 3.327115  |
| 6 | -2.901709 | -0.580540 | -1.131533 |
| 6 | -2.467458 | -2.651130 | 0.064009  |
| 1 | -2.386018 | -2.458215 | 2.219232  |
| 1 | -2.725655 | -1.947724 | 5.316190  |
| 1 | -2.263355 | -1.009906 | 6.759158  |
| 1 | -3.952816 | -0.998867 | 6.198547  |
| 1 | -2.137608 | 1.502522  | 6.659852  |
| 1 | -3.849622 | 1.541922  | 6.169499  |
| 1 | -2.618081 | 2.384212  | 5.195810  |
| 6 | 2.627213  | 1.958132  | -1.154436 |
| 1 | 3.011911  | 0.033353  | -2.066507 |
| 6 | 2.014931  | 4.110653  | 0.145022  |
| 6 | 3.142182  | -3.959089 | 0.073277  |

|   |           |           |           |
|---|-----------|-----------|-----------|
| 1 | 3.332020  | -2.504532 | -1.520107 |
| 6 | 2.894673  | -5.517707 | 2.117942  |
| 6 | -3.141510 | 3.959462  | 0.072505  |
| 1 | -3.330241 | 2.505500  | -1.521557 |
| 6 | -2.895399 | 5.517307  | 2.117933  |
| 6 | -2.625896 | -1.957343 | -1.157045 |
| 1 | -3.009883 | -0.032221 | -2.068681 |
| 6 | -2.014647 | -4.110389 | 0.142043  |
| 6 | 2.495110  | 2.651289  | -2.515508 |
| 6 | 2.199764  | 4.812936  | -1.206858 |
| 6 | 0.527500  | 4.104638  | 0.544755  |
| 6 | 2.808501  | 4.897078  | 1.197338  |
| 6 | 3.369730  | -5.125959 | -0.897474 |
| 6 | 2.697812  | -6.610240 | 1.057403  |
| 6 | 1.769818  | -5.657041 | 3.154279  |
| 6 | 4.240424  | -5.707123 | 2.841391  |
| 6 | -3.368325 | 5.126709  | -0.897964 |
| 6 | -2.697737 | 6.610238  | 1.057956  |
| 6 | -1.771308 | 5.656223  | 3.155157  |
| 6 | -4.241684 | 5.706483  | 2.840448  |
| 6 | -2.492958 | -2.650024 | -2.518276 |
| 6 | -2.198674 | -4.812169 | -1.210206 |
| 6 | -0.527470 | -4.104673 | 0.542724  |
| 6 | -2.808961 | -4.897120 | 1.193570  |

|   |           |           |           |
|---|-----------|-----------|-----------|
| 6 | 1.713599  | 3.966441  | -2.369032 |
| 6 | 1.727845  | 1.774309  | -3.516746 |
| 6 | 3.902563  | 2.923200  | -3.072741 |
| 1 | 1.664708  | 5.776593  | -1.181086 |
| 1 | 3.266855  | 5.055393  | -1.343099 |
| 1 | 0.145671  | 5.136451  | 0.618418  |
| 1 | 0.386544  | 3.616378  | 1.521631  |
| 1 | -0.095111 | 3.551034  | -0.174316 |
| 1 | 2.519889  | 5.958993  | 1.157649  |
| 1 | 3.890003  | 4.827162  | 1.008262  |
| 1 | 2.613862  | 4.543097  | 2.219286  |
| 6 | 4.592168  | -4.863329 | -1.790404 |
| 6 | 3.625373  | -6.433925 | -0.131772 |
| 6 | 2.131355  | -5.281814 | -1.797265 |
| 1 | 1.648233  | -6.589771 | 0.717758  |
| 1 | 2.854244  | -7.595024 | 1.526360  |
| 1 | 1.734942  | -6.695312 | 3.518364  |
| 1 | 0.792539  | -5.412204 | 2.715063  |
| 1 | 1.925022  | -5.011024 | 4.030016  |
| 1 | 5.092034  | -5.618636 | 2.152768  |
| 1 | 4.365714  | -4.938108 | 3.618285  |
| 1 | 4.281117  | -6.695746 | 3.325611  |
| 6 | -4.590146 | 4.864482  | -1.791857 |
| 6 | -3.624451 | 6.434399  | -0.131950 |

|   |           |           |           |
|---|-----------|-----------|-----------|
| 6 | -2.129312 | 5.282833  | -1.796826 |
| 1 | -1.647912 | 6.589888  | 0.719065  |
| 1 | -2.854495 | 7.594842  | 1.527180  |
| 1 | -1.927179 | 5.009884  | 4.030539  |
| 1 | -0.793712 | 5.411524  | 2.716572  |
| 1 | -1.736672 | 6.694356  | 3.519661  |
| 1 | -4.367606 | 4.937143  | 3.616917  |
| 1 | -4.282689 | 6.694903  | 3.325057  |
| 1 | -5.092777 | 5.618341  | 2.151139  |
| 6 | -1.711668 | -3.965303 | -2.371759 |
| 6 | -1.724961 | -1.772753 | -3.518694 |
| 6 | -3.900075 | -2.921597 | -3.076530 |
| 1 | -1.663731 | -5.775888 | -1.184436 |
| 1 | -3.265700 | -5.054471 | -1.347231 |
| 1 | -0.145781 | -5.136552 | 0.616196  |
| 1 | -0.387094 | -3.616833 | 1.519894  |
| 1 | 0.095647  | -3.550824 | -0.175720 |
| 1 | -2.614914 | -4.543546 | 2.215771  |
| 1 | -3.890339 | -4.827022 | 1.003852  |
| 1 | -2.520434 | -5.959050 | 1.153658  |
| 1 | 0.645551  | 3.730320  | -2.229934 |
| 1 | 1.787914  | 4.528239  | -3.314239 |
| 1 | 0.772888  | 1.436040  | -3.087457 |
| 1 | 1.514050  | 2.357760  | -4.425548 |

|   |           |           |           |
|---|-----------|-----------|-----------|
| 1 | 2.300159  | 0.888763  | -3.826029 |
| 1 | 4.459831  | 1.980838  | -3.180694 |
| 1 | 3.838480  | 3.402444  | -4.062504 |
| 1 | 4.484525  | 3.574866  | -2.405900 |
| 1 | 5.478549  | -4.628684 | -1.182699 |
| 1 | 4.810960  | -5.761466 | -2.388605 |
| 1 | 4.427238  | -4.033368 | -2.491305 |
| 1 | 4.671687  | -6.449869 | 0.213861  |
| 1 | 3.521522  | -7.277657 | -0.832689 |
| 1 | 2.301305  | -6.071630 | -2.545623 |
| 1 | 1.236023  | -5.541353 | -1.214751 |
| 1 | 1.917938  | -4.343539 | -2.331406 |
| 1 | -5.476969 | 4.629654  | -1.184867 |
| 1 | -4.808469 | 5.762858  | -2.389871 |
| 1 | -4.424764 | 4.034779  | -2.492955 |
| 1 | -4.671011 | 6.450257  | 0.212944  |
| 1 | -3.520068 | 7.278390  | -0.832475 |
| 1 | -2.298669 | 6.072969  | -2.544982 |
| 1 | -1.234360 | 5.542042  | -1.213582 |
| 1 | -1.915608 | 4.344759  | -2.331205 |
| 1 | -0.643686 | -3.729335 | -2.231879 |
| 1 | -1.785422 | -4.526756 | -3.317214 |
| 1 | -0.770235 | -1.434757 | -3.088677 |
| 1 | -2.296982 | -0.887024 | -3.827998 |

|   |           |           |           |
|---|-----------|-----------|-----------|
| 1 | -1.510660 | -2.355880 | -4.427584 |
| 1 | -4.457168 | -1.979136 | -3.184525 |
| 1 | -3.835391 | -3.400507 | -4.066415 |
| 1 | -4.482550 | -3.573426 | -2.410298 |

---

**Table S2**

**[P-Rea]<sup>3</sup>**

E : -3135.34880332 Hartree

G : -3134.017566 Hartree

---

| Atomic<br>Number | Coordinates (Angstroms) |           |          |
|------------------|-------------------------|-----------|----------|
|                  | X                       | Y         | Z        |
| 15               | 0.000140                | 0.000135  | 0.428315 |
| 6                | -0.000394               | -0.000068 | 2.249421 |
| 6                | 1.192458                | -0.090198 | 2.998324 |
| 6                | -1.193667               | 0.089916  | 2.997669 |
| 6                | 2.602515                | -0.232509 | 2.446473 |
| 6                | 1.196039                | -0.063569 | 4.394503 |
| 6                | -2.603425               | 0.232306  | 2.445055 |
| 6                | -1.198032               | 0.063041  | 4.393842 |
| 6                | 3.488464                | 0.043592  | 3.700602 |
| 6                | 2.890921                | 0.709407  | 1.289981 |

|   |           |           |          |
|---|-----------|-----------|----------|
| 6 | 2.852215  | -1.586043 | 1.782153 |
| 6 | 2.602596  | -0.098445 | 4.969860 |
| 6 | -0.001197 | -0.000325 | 5.108842 |
| 6 | -3.490060 | -0.044042 | 3.698634 |
| 6 | -2.852752 | 1.585955  | 1.780828 |
| 6 | -2.891179 | -0.709413 | 1.288240 |
| 6 | -2.604912 | 0.097832  | 4.968411 |
| 1 | 4.365903  | -0.618151 | 3.725648 |
| 1 | 3.861071  | 1.076393  | 3.633632 |
| 6 | 3.358014  | 0.017799  | 0.165494 |
| 6 | 2.602263  | 2.058139  | 1.209209 |
| 6 | 3.357280  | -1.419899 | 0.481132 |
| 6 | 2.613542  | -2.859041 | 2.264725 |
| 6 | 2.829913  | 1.078400  | 5.926076 |
| 6 | 2.868914  | -1.409629 | 5.721313 |
| 1 | -0.001504 | -0.000417 | 6.202949 |
| 1 | -4.367554 | 0.617642  | 3.723298 |
| 1 | -3.862566 | -1.076855 | 3.631284 |
| 6 | -3.357080 | 1.420031  | 0.479491 |
| 6 | -2.614333 | 2.858871  | 2.263737 |
| 6 | -3.357638 | -0.017612 | 0.163606 |
| 6 | -2.602511 | -2.058137 | 1.207406 |
| 6 | -2.832770 | -1.079144 | 5.924338 |
| 6 | -2.871666 | 1.408910  | 5.719889 |

|   |           |           |           |
|---|-----------|-----------|-----------|
| 6 | 3.561940  | 0.701493  | -1.025642 |
| 6 | 2.734685  | 2.749187  | -0.005800 |
| 1 | 2.174542  | 2.561252  | 2.080234  |
| 6 | 3.658267  | -2.531864 | -0.290850 |
| 6 | 2.916924  | -3.999724 | 1.496680  |
| 1 | 2.162137  | -2.981241 | 3.250207  |
| 1 | 2.593948  | 2.033192  | 5.433436  |
| 1 | 2.197197  | 0.989559  | 6.822373  |
| 1 | 3.879902  | 1.107777  | 6.255893  |
| 1 | 2.154329  | -1.535452 | 6.548899  |
| 1 | 3.885431  | -1.408490 | 6.143702  |
| 1 | 2.779303  | -2.280919 | 5.059048  |
| 6 | -3.657622 | 2.532121  | -0.292483 |
| 6 | -2.917285 | 3.999681  | 1.495707  |
| 1 | -2.163481 | 2.980918  | 3.249492  |
| 6 | -3.560926 | -0.701103 | -1.027751 |
| 6 | -2.734269 | -2.748983 | -0.007793 |
| 1 | -2.175272 | -2.561402 | 2.078579  |
| 1 | -2.596523 | -2.033869 | 5.431702  |
| 1 | -2.200567 | -0.990424 | 6.821009  |
| 1 | -3.882948 | -1.108569 | 6.253550  |
| 1 | -2.157539 | 1.534634  | 6.547885  |
| 1 | -3.888415 | 1.407699  | 6.141718  |
| 1 | -2.781704 | 2.280292  | 5.057792  |

|   |           |           |           |
|---|-----------|-----------|-----------|
| 6 | 3.239046  | 2.064729  | -1.136050 |
| 1 | 3.922998  | 0.158433  | -1.900372 |
| 6 | 2.165703  | 4.168154  | -0.081453 |
| 6 | 3.469273  | -3.833036 | 0.208108  |
| 1 | 4.037468  | -2.392274 | -1.305268 |
| 6 | 2.682154  | -5.377222 | 2.125913  |
| 6 | -3.468894 | 3.833211  | 0.206793  |
| 1 | -4.036258 | 2.392702  | -1.307135 |
| 6 | -2.682840 | 5.377063  | 2.125310  |
| 6 | -3.237999 | -2.064330 | -1.138204 |
| 1 | -3.921479 | -0.157891 | -1.902596 |
| 6 | -2.165222 | -4.167927 | -0.083377 |
| 6 | 3.472251  | 2.765479  | -2.479762 |
| 6 | 2.694345  | 4.897274  | -1.324181 |
| 6 | 0.630472  | 4.043454  | -0.147278 |
| 6 | 2.538962  | 5.002975  | 1.150947  |
| 6 | 3.829331  | -5.010506 | -0.706686 |
| 6 | 2.679183  | -6.459295 | 1.036805  |
| 6 | 1.334422  | -5.447254 | 2.858939  |
| 6 | 3.802586  | -5.645000 | 3.146881  |
| 6 | -3.828390 | 5.010836  | -0.708019 |
| 6 | -2.679307 | 6.459350  | 1.036407  |
| 6 | -1.335490 | 5.446932  | 2.859056  |
| 6 | -3.803806 | 5.644654  | 3.145743  |

|   |           |           |           |
|---|-----------|-----------|-----------|
| 6 | -3.470480 | -2.764863 | -2.482154 |
| 6 | -2.693154 | -4.896839 | -1.326527 |
| 6 | -0.629964 | -4.043182 | -0.148334 |
| 6 | -2.539142 | -5.002987 | 1.148667  |
| 6 | 2.621442  | 4.041379  | -2.576408 |
| 6 | 3.090943  | 1.866423  | -3.664691 |
| 6 | 4.967100  | 3.114568  | -2.588718 |
| 1 | 2.119183  | 5.827361  | -1.460883 |
| 1 | 3.738060  | 5.202623  | -1.141633 |
| 1 | 0.167463  | 5.044269  | -0.165934 |
| 1 | 0.241703  | 3.498653  | 0.728175  |
| 1 | 0.300381  | 3.486932  | -1.036618 |
| 1 | 2.199335  | 6.040643  | 1.007808  |
| 1 | 3.628362  | 5.015282  | 1.304290  |
| 1 | 2.065736  | 4.630008  | 2.069870  |
| 6 | 5.219088  | -4.814943 | -1.331134 |
| 6 | 3.855517  | -6.326292 | 0.086338  |
| 6 | 2.789456  | -5.100591 | -1.836728 |
| 1 | 1.734380  | -6.388513 | 0.471541  |
| 1 | 2.680232  | -7.450163 | 1.518734  |
| 1 | 1.156559  | -6.479213 | 3.198641  |
| 1 | 0.508720  | -5.157298 | 2.193833  |
| 1 | 1.305019  | -4.801906 | 3.748136  |
| 1 | 4.796801  | -5.617121 | 2.679618  |

|   |           |           |           |
|---|-----------|-----------|-----------|
| 1 | 3.789355  | -4.879109 | 3.936907  |
| 1 | 3.664253  | -6.630097 | 3.619871  |
| 6 | -5.217751 | 4.815381  | -1.333384 |
| 6 | -3.855090 | 6.326465  | 0.085240  |
| 6 | -2.787806 | 5.101134  | -1.837385 |
| 1 | -1.734175 | 6.388763  | 0.471666  |
| 1 | -2.680697 | 7.450119  | 1.518539  |
| 1 | -1.306568 | 4.801402  | 3.748138  |
| 1 | -0.509449 | 5.157087  | 2.194324  |
| 1 | -1.157787 | 6.478820  | 3.199055  |
| 1 | -3.791014 | 4.878620  | 3.935637  |
| 1 | -3.665722 | 6.629661  | 3.618992  |
| 1 | -4.797770 | 5.616872  | 2.677939  |
| 6 | -2.619575 | -4.040719 | -2.578557 |
| 6 | -3.088589 | -1.865604 | -3.666742 |
| 6 | -4.965261 | -3.113976 | -2.591937 |
| 1 | -2.117892 | -5.826886 | -1.463076 |
| 1 | -3.736962 | -5.202247 | -1.144612 |
| 1 | -0.166928 | -5.043986 | -0.166866 |
| 1 | -0.241700 | -3.498486 | 0.727411  |
| 1 | -0.299387 | -3.486532 | -1.037414 |
| 1 | -2.066402 | -4.630195 | 2.067911  |
| 1 | -3.628623 | -5.015324 | 1.301429  |
| 1 | -2.199435 | -6.040625 | 1.005511  |

|   |           |           |           |
|---|-----------|-----------|-----------|
| 1 | 1.574241  | 3.756218  | -2.769437 |
| 1 | 2.951655  | 4.618004  | -3.455494 |
| 1 | 2.070247  | 1.473185  | -3.547291 |
| 1 | 3.131247  | 2.452106  | -4.595863 |
| 1 | 3.777151  | 1.016923  | -3.785926 |
| 1 | 5.578700  | 2.202578  | -2.523215 |
| 1 | 5.177691  | 3.604517  | -3.552535 |
| 1 | 5.287432  | 3.784476  | -1.778395 |
| 1 | 5.976523  | -4.635008 | -0.554014 |
| 1 | 5.503825  | -5.721398 | -1.887549 |
| 1 | 5.245462  | -3.973506 | -2.037267 |
| 1 | 4.797214  | -6.383638 | 0.656366  |
| 1 | 3.875634  | -7.166655 | -0.625944 |
| 1 | 3.050589  | -5.912731 | -2.533154 |
| 1 | 1.781228  | -5.288846 | -1.442548 |
| 1 | 2.749292  | -4.159397 | -2.404695 |
| 1 | -5.975687 | 4.635322  | -0.556781 |
| 1 | -5.502124 | 5.721927  | -1.889834 |
| 1 | -5.243677 | 3.974064  | -2.039677 |
| 1 | -4.797123 | 6.383641  | 0.654731  |
| 1 | -3.874842 | 7.166957  | -0.626899 |
| 1 | -3.048506 | 5.913383  | -2.533847 |
| 1 | -1.779828 | 5.289326  | -1.442546 |
| 1 | -2.747279 | 4.160028  | -2.405476 |

|   |           |           |           |
|---|-----------|-----------|-----------|
| 1 | -1.572274 | -3.755492 | -2.770949 |
| 1 | -2.949281 | -4.617201 | -3.457927 |
| 1 | -2.067974 | -1.472339 | -3.548745 |
| 1 | -3.774774 | -1.016118 | -3.788206 |
| 1 | -3.128378 | -2.451148 | -4.598024 |
| 1 | -5.576924 | -2.202013 | -2.526639 |
| 1 | -5.175336 | -3.603810 | -3.555925 |
| 1 | -5.286002 | -3.783995 | -1.781867 |

---

**Table S3**

**[As-Rea]<sup>3</sup>**

E : -5029.75985200 Hartree

G : -5028.429603 Hartree

---

| Atomic<br>Number | Coordinates (Angstroms) |           |          |
|------------------|-------------------------|-----------|----------|
|                  | X                       | Y         | Z        |
| 33               | -0.000088               | 0.000209  | 0.288623 |
| 6                | 0.000045                | 0.000139  | 2.243041 |
| 6                | 1.193330                | -0.070193 | 2.986815 |
| 6                | -1.193146               | 0.070445  | 2.986972 |
| 6                | 2.608608                | -0.199432 | 2.441334 |
| 6                | 1.196748                | -0.048834 | 4.385081 |

|   |           |           |          |
|---|-----------|-----------|----------|
| 6 | -2.608506 | 0.199605  | 2.441681 |
| 6 | -1.196374 | 0.049117  | 4.385240 |
| 6 | 3.488121  | 0.083322  | 3.698986 |
| 6 | 2.916960  | 0.743302  | 1.291051 |
| 6 | 2.870962  | -1.551935 | 1.781098 |
| 6 | 2.601649  | -0.077123 | 4.963973 |
| 6 | 0.000235  | 0.000155  | 5.099581 |
| 6 | -3.487838 | -0.083110 | 3.699470 |
| 6 | -2.871012 | 1.552048  | 1.781390 |
| 6 | -2.916997 | -0.743223 | 1.291506 |
| 6 | -2.601196 | 0.077464  | 4.964319 |
| 1 | 4.375666  | -0.564944 | 3.722312 |
| 1 | 3.844703  | 1.122088  | 3.637580 |
| 6 | 3.422355  | 0.053710  | 0.181485 |
| 6 | 2.636668  | 2.093483  | 1.204665 |
| 6 | 3.409283  | -1.384868 | 0.493770 |
| 6 | 2.608738  | -2.824579 | 2.252569 |
| 6 | 2.818129  | 1.091541  | 5.932525 |
| 6 | 2.876958  | -1.394039 | 5.702299 |
| 1 | 0.000309  | 0.000172  | 6.193708 |
| 1 | -4.375401 | 0.565129  | 3.722882 |
| 1 | -3.844396 | -1.121891 | 3.638184 |
| 6 | -3.409543 | 1.384875  | 0.494166 |
| 6 | -2.608680 | 2.824730  | 2.252706 |

|   |           |           |           |
|---|-----------|-----------|-----------|
| 6 | -3.422628 | -0.053728 | 0.181986  |
| 6 | -2.636585 | -2.093381 | 1.205138  |
| 6 | -2.817560 | -1.091069 | 5.933048  |
| 6 | -2.876386 | 1.394490  | 5.702497  |
| 6 | 3.671125  | 0.740488  | -0.999122 |
| 6 | 2.820003  | 2.789492  | -0.001364 |
| 1 | 2.182760  | 2.596032  | 2.062696  |
| 6 | 3.715217  | -2.496347 | -0.277196 |
| 6 | 2.918797  | -3.964735 | 1.486744  |
| 1 | 2.131065  | -2.945346 | 3.225852  |
| 1 | 2.574116  | 2.049333  | 5.449728  |
| 1 | 2.185604  | 0.987747  | 6.827350  |
| 1 | 3.867568  | 1.126581  | 6.263603  |
| 1 | 2.159072  | -1.536509 | 6.524294  |
| 1 | 3.891163  | -1.387202 | 6.130249  |
| 1 | 2.800536  | -2.258312 | 5.029275  |
| 6 | -3.715554 | 2.496290  | -0.276862 |
| 6 | -2.918808 | 3.964823  | 1.486816  |
| 1 | -2.130862 | 2.945568  | 3.225910  |
| 6 | -3.671534 | -0.740589 | -0.998546 |
| 6 | -2.820046 | -2.789461 | -0.000828 |
| 1 | -2.182476 | -2.595841 | 2.063117  |
| 1 | -2.573636 | -2.048928 | 5.450338  |
| 1 | -2.184908 | -0.987173 | 6.827770  |

|   |           |           |           |
|---|-----------|-----------|-----------|
| 1 | -3.866952 | -1.126046 | 6.264280  |
| 1 | -2.158388 | 1.537071  | 6.524375  |
| 1 | -3.890536 | 1.387736  | 6.130581  |
| 1 | -2.800037 | 2.258660  | 5.029330  |
| 6 | 3.360810  | 2.106376  | -1.115411 |
| 1 | 4.062421  | 0.199301  | -1.861992 |
| 6 | 2.274771  | 4.217220  | -0.089400 |
| 6 | 3.498483  | -3.797478 | 0.210038  |
| 1 | 4.115001  | -2.356006 | -1.283504 |
| 6 | 2.663733  | -5.342654 | 2.107510  |
| 6 | -3.498675 | 3.797458  | 0.210204  |
| 1 | -4.115513 | 2.355866  | -1.283089 |
| 6 | -2.663628 | 5.342792  | 2.107428  |
| 6 | -3.361131 | -2.106457 | -1.114811 |
| 1 | -4.063025 | -0.199483 | -1.861377 |
| 6 | -2.274627 | -4.217117 | -0.088871 |
| 6 | 3.650744  | 2.810270  | -2.446517 |
| 6 | 2.863751  | 4.945842  | -1.304981 |
| 6 | 0.741659  | 4.118190  | -0.216609 |
| 6 | 2.612298  | 5.037897  | 1.162740  |
| 6 | 3.847326  | -4.974921 | -0.708694 |
| 6 | 2.668766  | -6.422580 | 1.016324  |
| 6 | 1.305527  | -5.406255 | 2.821246  |
| 6 | 3.768206  | -5.620637 | 3.143173  |

|   |           |           |           |
|---|-----------|-----------|-----------|
| 6 | -3.847524 | 4.974829  | -0.708615 |
| 6 | -2.668813 | 6.422646  | 1.016170  |
| 6 | -1.305316 | 5.406434  | 2.820955  |
| 6 | -3.767941 | 5.620869  | 3.143239  |
| 6 | -3.651274 | -2.810497 | -2.445789 |
| 6 | -2.863573 | -4.945881 | -1.304387 |
| 6 | -0.741544 | -4.117860 | -0.216227 |
| 6 | -2.611940 | -5.037780 | 1.163333  |
| 6 | 2.824587  | 4.100233  | -2.565605 |
| 6 | 3.295832  | 1.922642  | -3.648193 |
| 6 | 5.153790  | 3.135920  | -2.502619 |
| 1 | 2.310784  | 5.887012  | -1.456358 |
| 1 | 3.904824  | 5.230981  | -1.079556 |
| 1 | 0.296059  | 5.126606  | -0.247887 |
| 1 | 0.311282  | 3.575067  | 0.640144  |
| 1 | 0.439095  | 3.571435  | -1.121631 |
| 1 | 2.295933  | 6.081999  | 1.013608  |
| 1 | 3.694794  | 5.030785  | 1.359136  |
| 1 | 2.096895  | 4.667031  | 2.059534  |
| 6 | 5.239277  | -4.795457 | -1.332542 |
| 6 | 3.856274  | -6.293709 | 0.079300  |
| 6 | 2.805176  | -5.045526 | -1.838368 |
| 1 | 1.730834  | -6.346956 | 0.440629  |
| 1 | 2.660096  | -7.414195 | 1.496664  |

|   |           |           |           |
|---|-----------|-----------|-----------|
| 1 | 1.117867  | -6.437659 | 3.157381  |
| 1 | 0.491035  | -5.112731 | 2.143995  |
| 1 | 1.265992  | -4.761497 | 3.710417  |
| 1 | 4.768778  | -5.598931 | 2.689286  |
| 1 | 3.749767  | -4.856365 | 3.934660  |
| 1 | 3.616396  | -6.605803 | 3.611857  |
| 6 | -5.239491 | 4.795362  | -1.332418 |
| 6 | -3.856411 | 6.293680  | 0.079270  |
| 6 | -2.805394 | 5.045293  | -1.838320 |
| 1 | -1.730937 | 6.347026  | 0.440385  |
| 1 | -2.660131 | 7.414290  | 1.496450  |
| 1 | -1.265657 | 4.761765  | 3.710185  |
| 1 | -0.490937 | 5.112825  | 2.143603  |
| 1 | -1.117579 | 6.437869  | 3.156956  |
| 1 | -3.749376 | 4.856677  | 3.934800  |
| 1 | -3.616067 | 6.606084  | 3.611798  |
| 1 | -4.768582 | 5.599111  | 2.689505  |
| 6 | -2.824803 | -4.100248 | -2.565010 |
| 6 | -3.296952 | -1.922863 | -3.647631 |
| 6 | -5.154257 | -3.136520 | -2.501433 |
| 1 | -2.310365 | -5.886896 | -1.455843 |
| 1 | -3.904536 | -5.231318 | -1.078845 |
| 1 | -0.295785 | -5.126207 | -0.247424 |
| 1 | -0.311154 | -3.574566 | 0.640411  |

|   |           |           |           |
|---|-----------|-----------|-----------|
| 1 | -0.439161 | -3.571181 | -1.121357 |
| 1 | -2.096570 | -4.666759 | 2.060083  |
| 1 | -3.694428 | -5.030856 | 1.359775  |
| 1 | -2.295389 | -6.081833 | 1.014250  |
| 1 | 1.781099  | 3.833598  | -2.800480 |
| 1 | 3.197000  | 4.677585  | -3.427166 |
| 1 | 2.265301  | 1.546002  | -3.567911 |
| 1 | 3.377844  | 2.511385  | -4.574701 |
| 1 | 3.971553  | 1.062218  | -3.749620 |
| 1 | 5.748643  | 2.214311  | -2.419866 |
| 1 | 5.405032  | 3.625931  | -3.456587 |
| 1 | 5.456327  | 3.797969  | -1.679084 |
| 1 | 5.999139  | -4.627700 | -0.555059 |
| 1 | 5.512192  | -5.703943 | -1.891499 |
| 1 | 5.276850  | -3.952868 | -2.036753 |
| 1 | 4.791713  | -6.359217 | 0.658803  |
| 1 | 3.878062  | -7.131472 | -0.636020 |
| 1 | 3.049040  | -5.863556 | -2.534259 |
| 1 | 1.793212  | -5.211729 | -1.443438 |
| 1 | 2.784636  | -4.103995 | -2.406778 |
| 1 | -5.999348 | 4.627713  | -0.554906 |
| 1 | -5.512378 | 5.703807  | -1.891455 |
| 1 | -5.277114 | 3.952712  | -2.036553 |
| 1 | -4.791797 | 6.359216  | 0.658856  |

|   |           |           |           |
|---|-----------|-----------|-----------|
| 1 | -3.878280 | 7.131384  | -0.636116 |
| 1 | -3.049216 | 5.863292  | -2.534264 |
| 1 | -1.793410 | 5.211445  | -1.443423 |
| 1 | -2.784939 | 4.103718  | -2.406659 |
| 1 | -1.781420 | -3.833319 | -2.800022 |
| 1 | -3.197182 | -4.677690 | -3.426524 |
| 1 | -2.266490 | -1.545961 | -3.567702 |
| 1 | -3.972923 | -1.062616 | -3.748906 |
| 1 | -3.379112 | -2.511688 | -4.574073 |
| 1 | -5.749295 | -2.215030 | -2.418669 |
| 1 | -5.405645 | -3.626741 | -3.455255 |
| 1 | -5.456427 | -3.798497 | -1.677708 |

---

**Table S4**

**[Sb-Rea]<sup>3</sup>**

E : -3034.32824008 Hartree

G : -3032.998097 Hartree

---

| Atomic<br>Number | Coordinates (Angstroms) |          |          |
|------------------|-------------------------|----------|----------|
|                  | X                       | Y        | Z        |
| 51               | 0.000057                | 0.000145 | 0.035947 |
| 6                | 0.000177                | 0.000022 | 2.229893 |

|   |           |           |          |
|---|-----------|-----------|----------|
| 6 | 1.192672  | -0.033684 | 2.973697 |
| 6 | -1.192213 | 0.033679  | 2.973877 |
| 6 | 2.616775  | -0.135881 | 2.438717 |
| 6 | 1.196331  | -0.018712 | 4.374427 |
| 6 | -2.616416 | 0.135880  | 2.439149 |
| 6 | -1.195641 | 0.018701  | 4.374612 |
| 6 | 3.484394  | 0.166979  | 3.700219 |
| 6 | 2.944495  | 0.805227  | 1.293030 |
| 6 | 2.904640  | -1.487591 | 1.789413 |
| 6 | 2.598671  | -0.024512 | 4.959143 |
| 6 | 0.000401  | 0.000001  | 5.088958 |
| 6 | -3.483810 | -0.167003 | 3.700797 |
| 6 | -2.904417 | 1.487604  | 1.789941 |
| 6 | -2.944376 | -0.805200 | 1.293506 |
| 6 | -2.597882 | 0.024562  | 4.959560 |
| 1 | 4.391556  | -0.453721 | 3.723099 |
| 1 | 3.808608  | 1.216615  | 3.644284 |
| 6 | 3.505947  | 0.117843  | 0.208434 |
| 6 | 2.662068  | 2.154240  | 1.192199 |
| 6 | 3.484966  | -1.320896 | 0.520753 |
| 6 | 2.614903  | -2.759343 | 2.247530 |
| 6 | 2.789315  | 1.136260  | 5.942332 |
| 6 | 2.898500  | -1.344786 | 5.682106 |
| 1 | 0.000486  | 0.000015  | 6.183160 |

|   |           |           |           |
|---|-----------|-----------|-----------|
| 1 | -4.390992 | 0.453663  | 3.723817  |
| 1 | -3.807992 | -1.216653 | 3.644936  |
| 6 | -3.485022 | 1.320942  | 0.521405  |
| 6 | -2.614601 | 2.759342  | 2.248046  |
| 6 | -3.506076 | -0.117790 | 0.209055  |
| 6 | -2.661970 | -2.154212 | 1.192578  |
| 6 | -2.788378 | -1.136136 | 5.942864  |
| 6 | -2.897570 | 1.344900  | 5.682463  |
| 6 | 3.804612  | 0.804876  | -0.960104 |
| 6 | 2.901284  | 2.851759  | -0.003808 |
| 1 | 2.170059  | 2.655828  | 2.029586  |
| 6 | 3.798261  | -2.432241 | -0.247854 |
| 6 | 2.933878  | -3.899269 | 1.485685  |
| 1 | 2.103580  | -2.877233 | 3.203957  |
| 1 | 2.525408  | 2.094551  | 5.471114  |
| 1 | 2.157969  | 1.007820  | 6.834802  |
| 1 | 3.837325  | 1.189459  | 6.275673  |
| 1 | 2.177673  | -1.515053 | 6.496192  |
| 1 | 3.909048  | -1.320292 | 6.118154  |
| 1 | 2.848084  | -2.200888 | 4.996325  |
| 6 | -3.798487 | 2.432308  | -0.247101 |
| 6 | -2.933734 | 3.899289  | 1.486298  |
| 1 | -2.103097 | 2.877200  | 3.204381  |
| 6 | -3.805006 | -0.804795 | -0.959432 |

|   |           |           |           |
|---|-----------|-----------|-----------|
| 6 | -2.901443 | -2.851696 | -0.003396 |
| 1 | -2.169766 | -2.655819 | 2.029840  |
| 1 | -2.524559 | -2.094465 | 5.471674  |
| 1 | -2.156884 | -1.007637 | 6.835221  |
| 1 | -3.836333 | -1.189297 | 6.276380  |
| 1 | -2.176610 | 1.515220  | 6.496421  |
| 1 | -3.908050 | 1.320465  | 6.118673  |
| 1 | -2.847244 | 2.200944  | 4.996601  |
| 6 | 3.493896  | 2.169648  | -1.091741 |
| 1 | 4.238900  | 0.265304  | -1.803288 |
| 6 | 2.372689  | 4.284689  | -0.112316 |
| 6 | 3.547285  | -3.732522 | 0.224361  |
| 1 | 4.223377  | -2.291767 | -1.243645 |
| 6 | 2.653238  | -5.277303 | 2.095342  |
| 6 | -3.547404 | 3.732574  | 0.225097  |
| 1 | -4.223822 | 2.291865  | -1.242803 |
| 6 | -2.652975 | 5.277311  | 2.095932  |
| 6 | -3.494305 | -2.169560 | -1.091177 |
| 1 | -4.239494 | -0.265203 | -1.802499 |
| 6 | -2.372851 | -4.284615 | -0.112060 |
| 6 | 3.840051  | 2.870680  | -2.410852 |
| 6 | 3.023390  | 5.009851  | -1.298218 |
| 6 | 0.845737  | 4.205956  | -0.308128 |
| 6 | 2.664343  | 5.097823  | 1.156337  |

|   |           |           |           |
|---|-----------|-----------|-----------|
| 6 | 3.882282  | -4.909532 | -0.699638 |
| 6 | 2.663639  | -6.353308 | 1.000377  |
| 6 | 1.284454  | -5.330888 | 2.789031  |
| 6 | 3.739795  | -5.570509 | 3.145845  |
| 6 | -3.882608 | 4.909601  | -0.698801 |
| 6 | -2.663604 | 6.353339  | 1.000991  |
| 6 | -1.284048 | 5.330892  | 2.789336  |
| 6 | -3.739314 | 5.570493  | 3.146667  |
| 6 | -3.840748 | -2.870562 | -2.410228 |
| 6 | -3.023796 | -5.009752 | -1.297843 |
| 6 | -0.845944 | -4.205854 | -0.308211 |
| 6 | -2.664217 | -5.097781 | 1.156638  |
| 6 | 3.030430  | 4.167675  | -2.561612 |
| 6 | 3.521273  | 1.984332  | -3.623754 |
| 6 | 5.346896  | 3.183036  | -2.411761 |
| 1 | 2.488483  | 5.957724  | -1.470929 |
| 1 | 4.056645  | 5.282227  | -1.025885 |
| 1 | 0.414073  | 5.220033  | -0.350486 |
| 1 | 0.371281  | 3.660125  | 0.523338  |
| 1 | 0.577804  | 3.671364  | -1.231230 |
| 1 | 2.367180  | 6.145998  | 0.997051  |
| 1 | 3.737051  | 5.077000  | 1.399723  |
| 1 | 2.106137  | 4.730213  | 2.028443  |
| 6 | 5.278624  | -4.751543 | -1.318841 |

|   |           |           |           |
|---|-----------|-----------|-----------|
| 6 | 3.865071  | -6.232936 | 0.080070  |
| 6 | 2.840693  | -4.953012 | -1.831621 |
| 1 | 1.734495  | -6.267206 | 0.412251  |
| 1 | 2.639356  | -7.346356 | 1.477230  |
| 1 | 1.082554  | -6.361949 | 3.117917  |
| 1 | 0.482668  | -5.028194 | 2.100743  |
| 1 | 1.237207  | -4.689438 | 3.680113  |
| 1 | 4.746991  | -5.556653 | 2.706512  |
| 1 | 3.717202  | -4.809439 | 3.940282  |
| 1 | 3.571545  | -6.556208 | 3.607748  |
| 6 | -5.279087 | 4.751611  | -1.317694 |
| 6 | -3.865226 | 6.232990  | 0.080928  |
| 6 | -2.841272 | 4.953101  | -1.831015 |
| 1 | -1.734582 | 6.267249  | 0.412671  |
| 1 | -2.639220 | 7.346377  | 1.477860  |
| 1 | -1.236612 | 4.689440  | 3.680407  |
| 1 | -0.482411 | 5.028198  | 2.100876  |
| 1 | -1.082075 | 6.361952  | 3.118181  |
| 1 | -3.716545 | 4.809416  | 3.941094  |
| 1 | -3.570979 | 6.556189  | 3.608543  |
| 1 | -4.746602 | 5.556628  | 2.707545  |
| 6 | -3.031127 | -4.167533 | -2.561207 |
| 6 | -3.522266 | -1.984176 | -3.623181 |
| 6 | -5.347585 | -3.182954 | -2.410805 |

|   |           |           |           |
|---|-----------|-----------|-----------|
| 1 | -2.488901 | -5.957606 | -1.470701 |
| 1 | -4.056985 | -5.282165 | -1.025298 |
| 1 | -0.414265 | -5.219921 | -0.350672 |
| 1 | -0.371313 | -3.660019 | 0.523153  |
| 1 | -0.578228 | -3.671249 | -1.231368 |
| 1 | -2.105811 | -4.730195 | 2.028624  |
| 1 | -3.736870 | -5.076959 | 1.400270  |
| 1 | -2.367097 | -6.145954 | 0.997256  |
| 1 | 1.995572  | 3.910172  | -2.840745 |
| 1 | 3.443311  | 4.743534  | -3.405510 |
| 1 | 2.485074  | 1.616927  | -3.580092 |
| 1 | 3.641706  | 2.570755  | -4.547552 |
| 1 | 4.192260  | 1.117592  | -3.699450 |
| 1 | 5.930608  | 2.256891  | -2.304163 |
| 1 | 5.637650  | 3.667721  | -3.357141 |
| 1 | 5.624021  | 3.845443  | -1.579601 |
| 1 | 6.039355  | -4.601323 | -0.538615 |
| 1 | 5.536876  | -5.661908 | -1.881621 |
| 1 | 5.333296  | -3.906648 | -2.019128 |
| 1 | 4.792275  | -6.313139 | 0.670921  |
| 1 | 3.885737  | -7.066519 | -0.640189 |
| 1 | 3.065401  | -5.775528 | -2.528771 |
| 1 | 1.823977  | -5.094132 | -1.438563 |
| 1 | 2.844973  | -4.009869 | -2.397692 |

|   |           |           |           |
|---|-----------|-----------|-----------|
| 1 | -6.039643 | 4.601384  | -0.537300 |
| 1 | -5.537467 | 5.661977  | -1.880413 |
| 1 | -5.333910 | 3.906717  | -2.017972 |
| 1 | -4.792310 | 6.313188  | 0.671970  |
| 1 | -3.886037 | 7.066585  | -0.639312 |
| 1 | -3.066132 | 5.775636  | -2.528095 |
| 1 | -1.824468 | 5.094208  | -1.438178 |
| 1 | -2.845682 | 4.009973  | -2.397107 |
| 1 | -1.996336 | -3.909990 | -2.840551 |
| 1 | -3.444173 | -4.743374 | -3.405037 |
| 1 | -2.486067 | -1.616742 | -3.579742 |
| 1 | -4.193293 | -1.117453 | -3.698706 |
| 1 | -3.642889 | -2.570579 | -4.546965 |
| 1 | -5.931291 | -2.256824 | -2.303052 |
| 1 | -5.638542 | -3.667621 | -3.356131 |
| 1 | -5.624507 | -3.845387 | -1.578598 |

---

**Table S5**

**[Bi-Rea]<sup>3</sup>**

E : -3008.66842200 Hartree

G : -3007.339454 Hartree

---

Atomic

Coordinates (Angstroms)

| Number | X         | Y         | Z         |
|--------|-----------|-----------|-----------|
| 83     | -0.000525 | 0.000063  | -0.065974 |
| 6      | 0.001076  | 0.000235  | 2.237067  |
| 6      | 1.192643  | -0.027945 | 2.977586  |
| 6      | -1.189522 | 0.028557  | 2.979136  |
| 6      | 2.617499  | -0.121619 | 2.441257  |
| 6      | 1.198384  | -0.012971 | 4.379182  |
| 6      | -2.615054 | 0.122079  | 2.444638  |
| 6      | -1.193452 | 0.013934  | 4.380741  |
| 6      | 3.484518  | 0.186515  | 3.702125  |
| 6      | 2.937865  | 0.822238  | 1.296111  |
| 6      | 2.915212  | -1.470385 | 1.790630  |
| 6      | 2.601561  | -0.012652 | 4.961923  |
| 6      | 0.002931  | 0.000587  | 5.094682  |
| 6      | -3.480454 | -0.185785 | 3.706697  |
| 6      | -2.913673 | 1.470697  | 1.794127  |
| 6      | -2.936961 | -0.822044 | 1.300151  |
| 6      | -2.595876 | 0.013752  | 4.965303  |
| 1      | 4.396667  | -0.426987 | 3.723802  |
| 1      | 3.800394  | 1.238771  | 3.646883  |
| 6      | 3.507504  | 0.140683  | 0.212027  |
| 6      | 2.638617  | 2.167370  | 1.193025  |
| 6      | 3.497069  | -1.298512 | 0.523223  |

|   |           |           |           |
|---|-----------|-----------|-----------|
| 6 | 2.632817  | -2.744880 | 2.245800  |
| 6 | 2.788118  | 1.146475  | 5.947799  |
| 6 | 2.909850  | -1.333122 | 5.680971  |
| 1 | 0.003643  | 0.000724  | 6.188937  |
| 1 | -4.392605 | 0.427677  | 3.729387  |
| 1 | -3.796347 | -1.238070 | 3.652133  |
| 6 | -3.497227 | 1.298531  | 0.527543  |
| 6 | -2.630754 | 2.745300  | 2.248675  |
| 6 | -3.508043 | -0.140731 | 0.216673  |
| 6 | -2.637948 | -2.167224 | 1.197004  |
| 6 | -2.781116 | -1.145105 | 5.951743  |
| 6 | -2.903268 | 1.334422  | 5.684369  |
| 6 | 3.799487  | 0.830130  | -0.957012 |
| 6 | 2.869263  | 2.866328  | -0.003879 |
| 1 | 2.138499  | 2.662977  | 2.029105  |
| 6 | 3.819006  | -2.406490 | -0.246761 |
| 6 | 2.961322  | -3.881567 | 1.483037  |
| 1 | 2.119873  | -2.867241 | 3.200782  |
| 1 | 2.517875  | 2.104497  | 5.479628  |
| 1 | 2.159065  | 1.012203  | 6.841029  |
| 1 | 3.836477  | 1.204615  | 6.279382  |
| 1 | 2.191002  | -1.509414 | 6.495517  |
| 1 | 3.920951  | -1.304551 | 6.115610  |
| 1 | 2.862839  | -2.187641 | 4.992950  |

|   |           |           |           |
|---|-----------|-----------|-----------|
| 6 | -3.820326 | 2.406343  | -0.242201 |
| 6 | -2.960403 | 3.881817  | 1.486152  |
| 1 | -2.116540 | 2.867875  | 3.202948  |
| 6 | -3.801658 | -0.830456 | -0.951795 |
| 6 | -2.870280 | -2.866478 | 0.000602  |
| 1 | -2.136753 | -2.662661 | 2.032540  |
| 1 | -2.511458 | -2.103248 | 5.483483  |
| 1 | -2.150898 | -1.010565 | 6.844111  |
| 1 | -3.829039 | -1.203178 | 6.284711  |
| 1 | -2.183363 | 1.510982  | 6.497925  |
| 1 | -3.913799 | 1.305946  | 6.120337  |
| 1 | -2.857188 | 2.188739  | 4.996036  |
| 6 | 3.471298  | 2.190708  | -1.090737 |
| 1 | 4.240844  | 0.294854  | -1.799332 |
| 6 | 2.319992  | 4.291257  | -0.114824 |
| 6 | 3.576052  | -3.709147 | 0.223140  |
| 1 | 4.245504  | -2.261731 | -1.241417 |
| 6 | 2.689622  | -5.262445 | 2.090254  |
| 6 | -3.576849 | 3.709106  | 0.227130  |
| 1 | -4.248208 | 2.261365  | -1.236231 |
| 6 | -2.687971 | 5.262837  | 2.092722  |
| 6 | -3.473763 | -2.191099 | -1.085608 |
| 1 | -4.244146 | -0.295365 | -1.793639 |
| 6 | -2.321310 | -4.291502 | -0.110703 |

|   |           |           |           |
|---|-----------|-----------|-----------|
| 6 | 3.807450  | 2.894380  | -2.411022 |
| 6 | 2.959077  | 5.023539  | -1.302663 |
| 6 | 0.794125  | 4.190003  | -0.309094 |
| 6 | 2.601013  | 5.110934  | 1.152010  |
| 6 | 3.921888  | -4.882463 | -0.701640 |
| 6 | 2.708453  | -6.336497 | 0.993517  |
| 6 | 1.320668  | -5.326635 | 2.782595  |
| 6 | 3.777217  | -5.549715 | 3.141321  |
| 6 | -3.924103 | 4.882213  | -0.697386 |
| 6 | -2.708312 | 6.336630  | 0.995754  |
| 6 | -1.318101 | 5.327275  | 2.783225  |
| 6 | -3.774184 | 5.550300  | 3.145162  |
| 6 | -3.811918 | -2.895159 | -2.405172 |
| 6 | -2.962073 | -5.024064 | -1.297462 |
| 6 | -0.795698 | -4.190458 | -0.307083 |
| 6 | -2.600674 | -5.110824 | 1.156731  |
| 6 | 2.978568  | 4.178888  | -2.564250 |
| 6 | 3.501846  | 2.001341  | -3.622403 |
| 6 | 5.309517  | 3.228819  | -2.412630 |
| 1 | 2.409925  | 5.962872  | -1.477311 |
| 1 | 3.988179  | 5.312059  | -1.031315 |
| 1 | 0.347341  | 5.197501  | -0.351438 |
| 1 | 0.327906  | 3.637256  | 0.522708  |
| 1 | 0.533616  | 3.652110  | -1.232713 |

|   |           |           |           |
|---|-----------|-----------|-----------|
| 1 | 2.286896  | 6.154025  | 0.991763  |
| 1 | 3.674418  | 5.107458  | 1.393156  |
| 1 | 2.050691  | 4.735743  | 2.025817  |
| 6 | 5.319250  | -4.714137 | -1.315854 |
| 6 | 3.910792  | -6.207443 | 0.075580  |
| 6 | 2.884550  | -4.931109 | -1.837291 |
| 1 | 1.779808  | -6.254903 | 0.403918  |
| 1 | 2.689257  | -7.330513 | 1.468585  |
| 1 | 1.125535  | -6.359599 | 3.109596  |
| 1 | 0.517555  | -5.028263 | 2.094026  |
| 1 | 1.268125  | -4.686903 | 3.674580  |
| 1 | 4.784779  | -5.527728 | 2.703155  |
| 1 | 3.748187  | -4.790230 | 3.937046  |
| 1 | 3.615612  | -6.537435 | 3.601293  |
| 6 | -5.322363 | 4.713671  | -1.309497 |
| 6 | -3.911929 | 6.207367  | 0.079521  |
| 6 | -2.888460 | 4.930676  | -1.834592 |
| 1 | -1.780489 | 6.254877  | 0.404877  |
| 1 | -2.688439 | 7.330762  | 1.470551  |
| 1 | -1.264315 | 4.687741  | 3.675279  |
| 1 | -0.515894 | 5.028818  | 2.093644  |
| 1 | -1.122611 | 6.360326  | 3.109737  |
| 1 | -3.744002 | 4.791061  | 3.941078  |
| 1 | -3.612059 | 6.538173  | 3.604617  |

|   |           |           |           |
|---|-----------|-----------|-----------|
| 1 | -4.782332 | 5.528078  | 2.708360  |
| 6 | -2.983298 | -4.179738 | -2.559238 |
| 6 | -3.508153 | -2.002520 | -3.617301 |
| 6 | -5.314002 | -3.229545 | -2.404384 |
| 1 | -2.413189 | -5.963457 | -1.472630 |
| 1 | -3.990802 | -5.312497 | -1.024612 |
| 1 | -0.349050 | -5.198006 | -0.349623 |
| 1 | -0.328331 | -3.637414 | 0.523877  |
| 1 | -0.536393 | -3.652960 | -1.231270 |
| 1 | -2.049182 | -4.735392 | 2.029697  |
| 1 | -3.673756 | -5.107256 | 1.399304  |
| 1 | -2.286793 | -6.153968 | 0.996364  |
| 1 | 1.947567  | 3.905351  | -2.842667 |
| 1 | 3.382505  | 4.759118  | -3.409480 |
| 1 | 2.470682  | 1.619603  | -3.578503 |
| 1 | 3.614053  | 2.587513  | -4.547387 |
| 1 | 4.184809  | 1.143858  | -3.696290 |
| 1 | 5.906760  | 2.311542  | -2.303424 |
| 1 | 5.593184  | 3.716226  | -3.358763 |
| 1 | 5.576783  | 3.896527  | -1.581512 |
| 1 | 6.076261  | -4.560282 | -0.532734 |
| 1 | 5.585471  | -5.621751 | -1.879381 |
| 1 | 5.370738  | -3.867555 | -2.014364 |
| 1 | 4.837281  | -6.283454 | 0.668062  |

|   |           |           |           |
|---|-----------|-----------|-----------|
| 1 | 3.937681  | -7.039550 | -0.646190 |
| 1 | 3.117622  | -5.750291 | -2.535619 |
| 1 | 1.867665  | -5.080819 | -1.447855 |
| 1 | 2.883746  | -3.986627 | -2.401214 |
| 1 | -6.078219 | 4.559982  | -0.525229 |
| 1 | -5.589449 | 5.621134  | -1.872860 |
| 1 | -5.374841 | 3.866911  | -2.007719 |
| 1 | -4.837592 | 6.283511  | 0.673273  |
| 1 | -3.939825 | 7.039309  | -0.642400 |
| 1 | -3.122685 | 5.749625  | -2.532807 |
| 1 | -1.871021 | 5.080642  | -1.446715 |
| 1 | -2.888368 | 3.986031  | -2.398244 |
| 1 | -1.952678 | -3.906309 | -2.839174 |
| 1 | -3.388449 | -4.760177 | -3.403744 |
| 1 | -2.476923 | -1.620772 | -3.575116 |
| 1 | -4.191224 | -1.145058 | -3.690433 |
| 1 | -3.621779 | -2.588997 | -4.541918 |
| 1 | -5.911035 | -2.312197 | -2.294631 |
| 1 | -5.599121 | -3.717308 | -3.349899 |
| 1 | -5.580043 | -3.896911 | -1.572601 |

---

**Table S6**

HCCPh

E : -465.091555287 Hartree

G : -464.905333 Hartree

---

| Atomic | Coordinates (Angstroms) |           |           |
|--------|-------------------------|-----------|-----------|
| Number | X                       | Y         | Z         |
| 6      | -2.764503               | 0.509830  | -0.639605 |
| 1      | -2.557343               | -0.478623 | -0.274941 |
| 6      | -2.997927               | 1.624149  | -1.050576 |
| 6      | -3.275971               | 2.948857  | -1.536455 |
| 6      | -3.858749               | 3.912008  | -0.697143 |
| 1      | -4.100584               | 3.646182  | 0.332500  |
| 6      | -4.123858               | 5.188304  | -1.173700 |
| 1      | -4.577750               | 5.914626  | -0.496447 |
| 6      | -3.823867               | 5.560279  | -2.494400 |
| 6      | -3.243363               | 4.591766  | -3.321115 |
| 1      | -2.991629               | 4.830098  | -4.353821 |
| 6      | -2.972193               | 3.306964  | -2.855067 |
| 1      | -2.519315               | 2.568179  | -3.517243 |
| 6      | -4.136810               | 6.981591  | -2.970968 |
| 6      | -5.646543               | 7.239547  | -2.834453 |
| 1      | -6.220210               | 6.525922  | -3.443994 |
| 1      | -5.889190               | 8.258427  | -3.173134 |
| 1      | -5.981829               | 7.141463  | -1.792110 |

---

|   |           |          |           |
|---|-----------|----------|-----------|
| 6 | -3.363022 | 7.987941 | -2.103221 |
| 1 | -3.642399 | 7.908202 | -1.042990 |
| 1 | -3.577497 | 9.016090 | -2.432767 |
| 1 | -2.279195 | 7.817737 | -2.182248 |
| 6 | -3.738573 | 7.196360 | -4.433725 |
| 1 | -2.659333 | 7.047126 | -4.585302 |
| 1 | -3.980461 | 8.226375 | -4.733551 |
| 1 | -4.281433 | 6.514878 | -5.105188 |

---

### Table S7

[N-Rea]<sup>1</sup>

E : -2848.70258950 Hartree

G : -2847.368408 Hartree

---

| Atomic<br>Number | Coordinates (Angstroms) |           |          |
|------------------|-------------------------|-----------|----------|
|                  | X                       | Y         | Z        |
| 7                | -0.000385               | -0.000354 | 0.976474 |
| 6                | -0.003616               | -0.000503 | 2.276514 |
| 6                | 1.187317                | -0.217506 | 3.054651 |
| 6                | -1.198417               | 0.216324  | 3.048761 |
| 6                | 2.563350                | -0.376011 | 2.455359 |
| 6                | 1.194072                | -0.101571 | 4.433649 |

|   |           |           |          |
|---|-----------|-----------|----------|
| 6 | -2.571432 | 0.375175  | 2.442661 |
| 6 | -1.212080 | 0.099908  | 4.427681 |
| 6 | 3.484986  | -0.110328 | 3.686956 |
| 6 | 2.744568  | 0.555930  | 1.265978 |
| 6 | 2.759506  | -1.736958 | 1.782540 |
| 6 | 2.613734  | -0.145492 | 4.982871 |
| 6 | -0.010797 | -0.000965 | 5.147167 |
| 6 | -3.499199 | 0.108841  | 3.669501 |
| 6 | -2.764227 | 1.736490  | 1.769591 |
| 6 | -2.746750 | -0.556127 | 1.251904 |
| 6 | -2.634478 | 0.143583  | 4.969787 |
| 1 | 4.311186  | -0.833901 | 3.729599 |
| 1 | 3.932291  | 0.888263  | 3.575143 |
| 6 | 3.054369  | -0.152309 | 0.097268 |
| 6 | 2.449321  | 1.904246  | 1.202353 |
| 6 | 3.105644  | -1.583670 | 0.429712 |
| 6 | 2.635673  | -3.004404 | 2.317078 |
| 6 | 2.889554  | 1.084880  | 5.855478 |
| 6 | 2.850969  | -1.413767 | 5.811686 |
| 1 | -0.013512 | -0.001164 | 6.241196 |
| 1 | -4.325769 | 0.832209  | 3.708279 |
| 1 | -3.945706 | -0.889807 | 3.555017 |
| 6 | -3.103718 | 1.583883  | 0.415001 |
| 6 | -2.643025 | 3.003683  | 2.305340 |

|   |           |           |           |
|---|-----------|-----------|-----------|
| 6 | -3.050808 | 0.152700  | 0.082065  |
| 6 | -2.450988 | -1.904377 | 1.189012  |
| 6 | -2.914581 | -1.087146 | 5.840536  |
| 6 | -2.875936 | 1.411493  | 5.797936  |
| 6 | 3.095366  | 0.513098  | -1.118962 |
| 6 | 2.424881  | 2.579739  | -0.028923 |
| 1 | 2.140518  | 2.425363  | 2.112481  |
| 6 | 3.366456  | -2.701454 | -0.347174 |
| 6 | 2.885613  | -4.152221 | 1.539168  |
| 1 | 2.324288  | -3.121058 | 3.356065  |
| 1 | 2.680617  | 2.011794  | 5.301077  |
| 1 | 2.262673  | 1.077526  | 6.760325  |
| 1 | 3.943419  | 1.101597  | 6.173266  |
| 1 | 2.160289  | -1.454440 | 6.667822  |
| 1 | 3.879601  | -1.430463 | 6.202716  |
| 1 | 2.698776  | -2.321517 | 5.212152  |
| 6 | -3.360674 | 2.702047  | -0.362623 |
| 6 | -2.889188 | 4.151883  | 1.526785  |
| 1 | -2.336729 | 3.119843  | 3.345890  |
| 6 | -3.085724 | -0.512062 | -1.134722 |
| 6 | -2.420280 | -2.579176 | -0.042491 |
| 1 | -2.146538 | -2.425908 | 2.100370  |
| 1 | -2.702695 | -2.013827 | 5.286868  |
| 1 | -2.292288 | -1.080036 | 6.748547  |

|   |           |           |           |
|---|-----------|-----------|-----------|
| 1 | -3.970044 | -1.104115 | 6.152965  |
| 1 | -2.189568 | 1.451794  | 6.657550  |
| 1 | -3.906517 | 1.427976  | 6.183807  |
| 1 | -2.720776 | 2.319522  | 5.199594  |
| 6 | 2.761254  | 1.876112  | -1.206173 |
| 1 | 3.324639  | -0.046788 | -2.026861 |
| 6 | 1.862960  | 4.002785  | -0.037215 |
| 6 | 3.286499  | -3.996961 | 0.195620  |
| 1 | 3.637390  | -2.571633 | -1.397088 |
| 6 | 2.746107  | -5.522649 | 2.210190  |
| 6 | -3.283411 | 3.997287  | 0.181188  |
| 1 | -3.626369 | 2.572731  | -1.413937 |
| 6 | -2.753193 | 5.521967  | 2.199221  |
| 6 | -2.751036 | -1.874978 | -1.221006 |
| 1 | -3.310484 | 0.048325  | -2.043435 |
| 6 | -1.857634 | -4.001953 | -0.048750 |
| 6 | 2.770663  | 2.546883  | -2.584587 |
| 6 | 2.169741  | 4.701427  | -1.368710 |
| 6 | 0.341014  | 3.893298  | 0.171611  |
| 6 | 2.454233  | 4.858011  | 1.091969  |
| 6 | 3.624885  | -5.178961 | -0.722679 |
| 6 | 2.678254  | -6.623902 | 1.142034  |
| 6 | 1.466357  | -5.608919 | 3.056104  |
| 6 | 3.954327  | -5.746398 | 3.136847  |

|   |           |           |           |
|---|-----------|-----------|-----------|
| 6 | -3.617120 | 5.179748  | -0.738226 |
| 6 | -2.679927 | 6.623766  | 1.131994  |
| 6 | -1.477819 | 5.607894  | 3.051743  |
| 6 | -3.966166 | 5.745159  | 3.119791  |
| 6 | -2.753708 | -2.545212 | -2.599700 |
| 6 | -2.156779 | -4.699979 | -1.382312 |
| 6 | -0.336865 | -3.891763 | 0.168254  |
| 6 | -2.454470 | -4.858216 | 1.076715  |
| 6 | 1.896961  | 3.811316  | -2.568070 |
| 6 | 2.210974  | 1.616464  | -3.670828 |
| 6 | 4.222997  | 2.905161  | -2.944351 |
| 1 | 1.569197  | 5.623904  | -1.430294 |
| 1 | 3.225802  | 5.018831  | -1.373091 |
| 1 | -0.112106 | 4.897013  | 0.218428  |
| 1 | 0.106711  | 3.368099  | 1.110665  |
| 1 | -0.149849 | 3.324341  | -0.631631 |
| 1 | 2.102599  | 5.896492  | 0.987687  |
| 1 | 3.553787  | 4.861414  | 1.052177  |
| 1 | 2.146002  | 4.508572  | 2.087420  |
| 6 | 4.960469  | -4.935801 | -1.442800 |
| 6 | 3.763437  | -6.475489 | 0.090764  |
| 6 | 2.521275  | -5.341321 | -1.781991 |
| 1 | 1.686248  | -6.589889 | 0.659678  |
| 1 | 2.748966  | -7.605633 | 1.637306  |

|   |           |           |           |
|---|-----------|-----------|-----------|
| 1 | 1.338870  | -6.638946 | 3.423254  |
| 1 | 0.580238  | -5.342150 | 2.462293  |
| 1 | 1.501087  | -4.950951 | 3.935981  |
| 1 | 4.904582  | -5.707174 | 2.586326  |
| 1 | 3.991179  | -4.965583 | 3.911381  |
| 1 | 3.878968  | -6.724392 | 3.638001  |
| 6 | -4.949051 | 4.937018  | -1.465227 |
| 6 | -3.759738 | 6.475892  | 0.075127  |
| 6 | -2.508149 | 5.342561  | -1.791858 |
| 1 | -1.685479 | 6.590020  | 0.654677  |
| 1 | -2.753195 | 7.605240  | 1.627404  |
| 1 | -1.517102 | 4.949617  | 3.931194  |
| 1 | -0.588678 | 5.341287  | 2.462400  |
| 1 | -1.352181 | 6.637786  | 3.419905  |
| 1 | -4.006857 | 4.964003  | 3.893790  |
| 1 | -3.893490 | 6.722947  | 3.621745  |
| 1 | -4.913600 | 5.706044  | 2.564422  |
| 6 | -1.878805 | -3.808750 | -2.579651 |
| 6 | -2.190234 | -1.613922 | -3.683214 |
| 6 | -4.204120 | -2.904776 | -2.965919 |
| 1 | -1.554881 | -5.621735 | -1.441409 |
| 1 | -3.212429 | -5.018597 | -1.392436 |
| 1 | 0.116510  | -4.895265 | 0.216998  |
| 1 | -0.107827 | -3.366879 | 1.108778  |

|   |           |           |           |
|---|-----------|-----------|-----------|
| 1 | 0.157971  | -3.322173 | -0.632097 |
| 1 | -2.151906 | -4.509143 | 2.074032  |
| 1 | -3.553789 | -4.862317 | 1.030931  |
| 1 | -2.101594 | -5.896409 | 0.973753  |
| 1 | 0.836566  | 3.509097  | -2.569772 |
| 1 | 2.063589  | 4.366538  | -3.505336 |
| 1 | 1.228923  | 1.216690  | -3.377315 |
| 1 | 2.089927  | 2.180523  | -4.608405 |
| 1 | 2.878861  | 0.770653  | -3.885061 |
| 1 | 4.847513  | 1.999600  | -2.958869 |
| 1 | 4.268087  | 3.372814  | -3.940729 |
| 1 | 4.663840  | 3.597070  | -2.213004 |
| 1 | 5.757984  | -4.704320 | -0.721436 |
| 1 | 5.249419  | -5.840988 | -1.999235 |
| 1 | 4.900821  | -4.109467 | -2.164643 |
| 1 | 4.751481  | -6.489606 | 0.579081  |
| 1 | 3.751712  | -7.330718 | -0.603803 |
| 1 | 2.795366  | -6.132360 | -2.497345 |
| 1 | 1.556313  | -5.604940 | -1.327369 |
| 1 | 2.376536  | -4.406056 | -2.343236 |
| 1 | -5.750223 | 4.705189  | -0.748039 |
| 1 | -5.235154 | 5.842512  | -2.022631 |
| 1 | -4.885784 | 4.111073  | -2.187208 |
| 1 | -4.750254 | 6.489824  | 0.558417  |

|   |           |           |           |
|---|-----------|-----------|-----------|
| 1 | -3.744442 | 7.331457  | -0.618957 |
| 1 | -2.778528 | 6.134045  | -2.508133 |
| 1 | -1.545448 | 5.605783  | -1.332235 |
| 1 | -2.360715 | 4.407591  | -2.352890 |
| 1 | -0.818741 | -3.505381 | -2.575743 |
| 1 | -2.040089 | -4.363510 | -3.518125 |
| 1 | -1.209837 | -1.213282 | -3.385382 |
| 1 | -2.858025 | -0.768707 | -3.900081 |
| 1 | -2.064610 | -2.177571 | -4.620433 |
| 1 | -4.829318 | -1.999734 | -2.983183 |
| 1 | -4.244383 | -3.372444 | -3.962501 |
| 1 | -4.647628 | -3.597058 | -2.236543 |

-----

**Table S8**

**[P-Rea]<sup>1</sup>**

E : -3135.35190422 Hartree

G : -3134.017639 Hartree

-----

| Atomic<br>Number | Coordinates (Angstroms) |          |          |
|------------------|-------------------------|----------|----------|
|                  | X                       | Y        | Z        |
| 15               | 0.284028                | 0.399635 | 0.565060 |
| 6                | -0.094841               | 0.071662 | 2.339309 |

-----

|   |           |           |          |
|---|-----------|-----------|----------|
| 6 | 1.030030  | -0.279828 | 3.065627 |
| 6 | -1.275030 | 0.188841  | 3.073620 |
| 6 | 2.330132  | -0.435779 | 2.353922 |
| 6 | 1.117886  | -0.243614 | 4.449755 |
| 6 | -2.661567 | 0.398747  | 2.505297 |
| 6 | -1.269748 | 0.037670  | 4.463672 |
| 6 | 3.303757  | 0.065630  | 3.465504 |
| 6 | 2.172508  | 0.326137  | 1.043554 |
| 6 | 2.696436  | -1.804321 | 1.773547 |
| 6 | 2.594441  | -0.182107 | 4.850590 |
| 6 | -0.068115 | -0.112696 | 5.179311 |
| 6 | -3.566743 | 0.083737  | 3.737301 |
| 6 | -2.890051 | 1.768432  | 1.864620 |
| 6 | -2.845674 | -0.512105 | 1.296881 |
| 6 | -2.683937 | 0.108635  | 5.023850 |
| 1 | 4.291220  | -0.415103 | 3.413508 |
| 1 | 3.446994  | 1.149650  | 3.332212 |
| 6 | 3.016173  | -0.279101 | 0.013036 |
| 6 | 1.688910  | 1.700485  | 0.905531 |
| 6 | 3.213027  | -1.665870 | 0.466989 |
| 6 | 2.558804  | -3.065726 | 2.319852 |
| 6 | 2.833527  | 1.003536  | 5.791272 |
| 6 | 3.085874  | -1.463473 | 5.535057 |
| 1 | -0.069644 | -0.107404 | 6.273413 |

|   |           |           |           |
|---|-----------|-----------|-----------|
| 1 | -4.413320 | 0.781791  | 3.804227  |
| 1 | -3.985602 | -0.924945 | 3.605836  |
| 6 | -3.297789 | 1.633071  | 0.524801  |
| 6 | -2.723099 | 3.033965  | 2.395055  |
| 6 | -3.209524 | 0.211542  | 0.156239  |
| 6 | -2.484807 | -1.842756 | 1.185710  |
| 6 | -2.982382 | -1.106384 | 5.909599  |
| 6 | -2.894942 | 1.389217  | 5.842148  |
| 6 | 3.315284  | 0.415800  | -1.102115 |
| 6 | 2.123798  | 2.436008  | -0.306369 |
| 1 | 1.507514  | 2.273974  | 1.818273  |
| 6 | 3.637962  | -2.789023 | -0.227590 |
| 6 | 2.955170  | -4.217029 | 1.612158  |
| 1 | 2.086353  | -3.174754 | 3.296941  |
| 1 | 2.438996  | 1.933984  | 5.357119  |
| 1 | 2.339438  | 0.841533  | 6.761565  |
| 1 | 3.910799  | 1.134681  | 5.977420  |
| 1 | 2.486146  | -1.673121 | 6.433669  |
| 1 | 4.136887  | -1.353210 | 5.843035  |
| 1 | 3.021821  | -2.332595 | 4.869037  |
| 6 | -3.625821 | 2.754969  | -0.219921 |
| 6 | -3.021124 | 4.187388  | 1.641622  |
| 1 | -2.336584 | 3.144645  | 3.409566  |
| 6 | -3.239562 | -0.417850 | -1.081816 |

|   |           |           |           |
|---|-----------|-----------|-----------|
| 6 | -2.444286 | -2.478176 | -0.065985 |
| 1 | -2.133453 | -2.372689 | 2.074684  |
| 1 | -2.790949 | -2.042866 | 5.365129  |
| 1 | -2.353184 | -1.101055 | 6.812717  |
| 1 | -4.035626 | -1.100262 | 6.230441  |
| 1 | -2.196348 | 1.426997  | 6.691781  |
| 1 | -3.920624 | 1.428232  | 6.240015  |
| 1 | -2.731891 | 2.287530  | 5.231532  |
| 6 | 2.828884  | 1.793860  | -1.286521 |
| 1 | 3.917274  | -0.038567 | -1.890245 |
| 6 | 1.683075  | 3.895560  | -0.369406 |
| 6 | 3.534646  | -4.073800 | 0.333553  |
| 1 | 4.017840  | -2.673213 | -1.244959 |
| 6 | 2.750924  | -5.578676 | 2.283812  |
| 6 | -3.535016 | 4.043401  | 0.336186  |
| 1 | -3.962800 | 2.633918  | -1.251853 |
| 6 | -2.770403 | 5.552735  | 2.289163  |
| 6 | -2.835831 | -1.755770 | -1.217598 |
| 1 | -3.510832 | 0.158118  | -1.967961 |
| 6 | -1.822221 | -3.875895 | -0.136104 |
| 6 | 3.159995  | 2.446657  | -2.630079 |
| 6 | 2.336833  | 4.596715  | -1.568400 |
| 6 | 0.148499  | 3.968895  | -0.465900 |
| 6 | 2.124349  | 4.644284  | 0.900803  |

|   |           |           |           |
|---|-----------|-----------|-----------|
| 6 | 3.993786  | -5.264937 | -0.516018 |
| 6 | 2.852154  | -6.700700 | 1.240598  |
| 6 | 1.366522  | -5.676234 | 2.943347  |
| 6 | 3.823206  | -5.758646 | 3.372693  |
| 6 | -4.010332 | 5.227466  | -0.515360 |
| 6 | -2.855394 | 6.660387  | 1.228722  |
| 6 | -1.364193 | 5.607638  | 2.905732  |
| 6 | -3.806549 | 5.791072  | 3.400164  |
| 6 | -2.831858 | -2.374696 | -2.620503 |
| 6 | -2.163847 | -4.547113 | -1.473115 |
| 6 | -0.295940 | -3.715938 | 0.010384  |
| 6 | -2.330342 | -4.784418 | 0.991643  |
| 6 | 2.331848  | 3.727106  | -2.811259 |
| 6 | 2.796012  | 1.498894  | -3.785935 |
| 6 | 4.663668  | 2.758207  | -2.698512 |
| 1 | 1.813635  | 5.548669  | -1.753284 |
| 1 | 3.375651  | 4.857860  | -1.306859 |
| 1 | -0.172859 | 5.022284  | -0.422601 |
| 1 | -0.339756 | 3.432020  | 0.363153  |
| 1 | -0.225289 | 3.528824  | -1.402714 |
| 1 | 1.929489  | 5.720667  | 0.773270  |
| 1 | 3.201174  | 4.510094  | 1.084465  |
| 1 | 1.575203  | 4.318249  | 1.795076  |
| 6 | 5.393596  | -5.012384 | -1.095482 |

|   |           |           |           |
|---|-----------|-----------|-----------|
| 6 | 4.060942  | -6.541702 | 0.335607  |
| 6 | 3.006153  | -5.462576 | -1.679167 |
| 1 | 1.930631  | -6.703805 | 0.633678  |
| 1 | 2.882893  | -7.670285 | 1.762952  |
| 1 | 1.200339  | -6.706319 | 3.294220  |
| 1 | 0.569576  | -5.422004 | 2.229277  |
| 1 | 1.269563  | -5.014942 | 3.815745  |
| 1 | 4.839403  | -5.718747 | 2.956216  |
| 1 | 3.743769  | -4.958790 | 4.124186  |
| 1 | 3.691674  | -6.725051 | 3.884370  |
| 6 | -5.423475 | 4.953525  | -1.054133 |
| 6 | -4.071425 | 6.506926  | 0.333267  |
| 6 | -3.063784 | 5.434483  | -1.708565 |
| 1 | -1.939174 | 6.631836  | 0.614344  |
| 1 | -2.861363 | 7.639159  | 1.734479  |
| 1 | -1.254381 | 4.926498  | 3.761402  |
| 1 | -0.602271 | 5.345304  | 2.156856  |
| 1 | -1.157671 | 6.627470  | 3.265804  |
| 1 | -3.743318 | 5.000524  | 4.162818  |
| 1 | -3.624428 | 6.758586  | 3.893751  |
| 1 | -4.832889 | 5.787528  | 3.006926  |
| 6 | -1.938229 | -3.624558 | -2.657482 |
| 6 | -2.286200 | -1.389762 | -3.665658 |
| 6 | -4.277024 | -2.744949 | -2.996219 |

|   |           |           |           |
|---|-----------|-----------|-----------|
| 1 | -1.556364 | -5.460967 | -1.576435 |
| 1 | -3.216719 | -4.874730 | -1.449869 |
| 1 | 0.201267  | -4.699878 | -0.028874 |
| 1 | -0.042276 | -3.243822 | 0.972959  |
| 1 | 0.131458  | -3.078040 | -0.777350 |
| 1 | -1.996400 | -4.447582 | 1.983004  |
| 1 | -3.429465 | -4.833713 | 0.995561  |
| 1 | -1.940542 | -5.803996 | 0.844754  |
| 1 | 1.294481  | 3.443874  | -3.056012 |
| 1 | 2.719240  | 4.283241  | -3.680078 |
| 1 | 1.758889  | 1.144420  | -3.687956 |
| 1 | 2.888158  | 2.036171  | -4.742507 |
| 1 | 3.455807  | 0.621917  | -3.837082 |
| 1 | 5.260627  | 1.848827  | -2.533702 |
| 1 | 4.926342  | 3.162524  | -3.688609 |
| 1 | 4.958839  | 3.489688  | -1.933128 |
| 1 | 6.108936  | -4.764540 | -0.297486 |
| 1 | 5.749767  | -5.918631 | -1.609404 |
| 1 | 5.400139  | -4.193338 | -1.828077 |
| 1 | 4.977892  | -6.517735 | 0.946943  |
| 1 | 4.160783  | -7.409469 | -0.335850 |
| 1 | 3.343402  | -6.283852 | -2.330597 |
| 1 | 1.995651  | -5.699063 | -1.316863 |
| 1 | 2.931076  | -4.549604 | -2.288068 |

|   |           |           |           |
|---|-----------|-----------|-----------|
| 1 | -6.112600 | 4.701973  | -0.234596 |
| 1 | -5.805349 | 5.851419  | -1.564552 |
| 1 | -5.438091 | 4.127475  | -1.778810 |
| 1 | -4.983264 | 6.484742  | 0.952473  |
| 1 | -4.175024 | 7.373783  | -0.338743 |
| 1 | -3.451065 | 6.227994  | -2.366457 |
| 1 | -2.054685 | 5.718439  | -1.380904 |
| 1 | -2.970638 | 4.512855  | -2.301834 |
| 1 | -0.882910 | -3.307000 | -2.680652 |
| 1 | -2.121528 | -4.158862 | -3.603688 |
| 1 | -1.314587 | -0.982204 | -3.348215 |
| 1 | -2.969833 | -0.549311 | -3.849114 |
| 1 | -2.147844 | -1.912489 | -4.624626 |
| 1 | -4.921681 | -1.854049 | -2.966810 |
| 1 | -4.313326 | -3.164878 | -4.013877 |
| 1 | -4.700866 | -3.481531 | -2.299043 |

---

**Table S9**

**[As-Rea]<sup>1</sup>**

E : -5029.74123591 Hartree

G : -5028.409565 Hartree

---

Atomic

Coordinates (Angstroms)

| Number | X         | Y         | Z         |
|--------|-----------|-----------|-----------|
| 33     | 0.196257  | 0.464774  | 0.426989  |
| 6      | -0.125628 | 0.098607  | 2.319953  |
| 6      | 1.030549  | -0.208224 | 3.018708  |
| 6      | -1.290296 | 0.169606  | 3.083831  |
| 6      | 2.331201  | -0.363274 | 2.302491  |
| 6      | 1.137027  | -0.198224 | 4.404078  |
| 6      | -2.693689 | 0.345667  | 2.545980  |
| 6      | -1.254534 | 0.012720  | 4.472279  |
| 6      | 3.315864  | 0.118061  | 3.414620  |
| 6      | 2.244900  | 0.415535  | 1.000026  |
| 6      | 2.678252  | -1.739515 | 1.729846  |
| 6      | 2.613931  | -0.137497 | 4.798124  |
| 6      | -0.035650 | -0.113410 | 5.160625  |
| 6      | -3.566754 | 0.008975  | 3.794846  |
| 6      | -2.952510 | 1.712058  | 1.911779  |
| 6      | -2.892834 | -0.566019 | 1.341465  |
| 6      | -2.657756 | 0.049233  | 5.062146  |
| 1      | 4.298428  | -0.370888 | 3.348623  |
| 1      | 3.467893  | 1.201875  | 3.290390  |
| 6      | 3.067830  | -0.220561 | -0.017089 |
| 6      | 1.805512  | 1.783993  | 0.851116  |
| 6      | 3.221982  | -1.613362 | 0.434301  |

|   |           |           |           |
|---|-----------|-----------|-----------|
| 6 | 2.507503  | -2.996124 | 2.277391  |
| 6 | 2.856544  | 1.042684  | 5.745301  |
| 6 | 3.108374  | -1.422797 | 5.473438  |
| 1 | -0.012783 | -0.129712 | 6.254343  |
| 1 | -4.426051 | 0.689151  | 3.881420  |
| 1 | -3.967513 | -1.007784 | 3.669219  |
| 6 | -3.388652 | 1.574191  | 0.581671  |
| 6 | -2.758912 | 2.977578  | 2.432279  |
| 6 | -3.303113 | 0.152290  | 0.212423  |
| 6 | -2.522098 | -1.893129 | 1.219723  |
| 6 | -2.911101 | -1.173138 | 5.951543  |
| 6 | -2.879448 | 1.324443  | 5.886145  |
| 6 | 3.405848  | 0.465906  | -1.131297 |
| 6 | 2.257273  | 2.509883  | -0.346885 |
| 1 | 1.561271  | 2.352409  | 1.751021  |
| 6 | 3.636361  | -2.744874 | -0.252186 |
| 6 | 2.901462  | -4.155730 | 1.581523  |
| 1 | 2.015466  | -3.091806 | 3.246330  |
| 1 | 2.460445  | 1.975561  | 5.317856  |
| 1 | 2.364954  | 0.874830  | 6.715843  |
| 1 | 3.934377  | 1.172734  | 5.929233  |
| 1 | 2.509009  | -1.640635 | 6.370377  |
| 1 | 4.158956  | -1.311843 | 5.782809  |
| 1 | 3.047140  | -2.286964 | 4.800618  |

|   |           |           |           |
|---|-----------|-----------|-----------|
| 6 | -3.712734 | 2.696030  | -0.164521 |
| 6 | -3.049231 | 4.130781  | 1.676130  |
| 1 | -2.347584 | 3.086605  | 3.437226  |
| 6 | -3.374802 | -0.481906 | -1.021857 |
| 6 | -2.527541 | -2.533800 | -0.030135 |
| 1 | -2.132586 | -2.416199 | 2.096733  |
| 1 | -2.710676 | -2.104407 | 5.401338  |
| 1 | -2.263494 | -1.155520 | 6.841398  |
| 1 | -3.957246 | -1.190672 | 6.294500  |
| 1 | -2.160988 | 1.379621  | 6.718058  |
| 1 | -3.895762 | 1.338690  | 6.309030  |
| 1 | -2.753910 | 2.226002  | 5.271208  |
| 6 | 2.964704  | 1.850042  | -1.321251 |
| 1 | 4.002385  | -0.009738 | -1.910844 |
| 6 | 1.866767  | 3.985281  | -0.413622 |
| 6 | 3.502257  | -4.026146 | 0.311091  |
| 1 | 4.035714  | -2.638581 | -1.263087 |
| 6 | 2.681124  | -5.511913 | 2.259281  |
| 6 | -3.585295 | 3.986353  | 0.379342  |
| 1 | -4.063709 | 2.574507  | -1.191615 |
| 6 | -2.765072 | 5.495691  | 2.311255  |
| 6 | -2.971489 | -1.819274 | -1.167613 |
| 1 | -3.685258 | 0.088298  | -1.898823 |
| 6 | -1.902613 | -3.929414 | -0.118276 |

|   |           |           |           |
|---|-----------|-----------|-----------|
| 6 | 3.342331  | 2.498919  | -2.654441 |
| 6 | 2.583356  | 4.668394  | -1.587041 |
| 6 | 0.340512  | 4.120695  | -0.560306 |
| 6 | 2.294816  | 4.710348  | 0.874556  |
| 6 | 3.953428  | -5.227123 | -0.529250 |
| 6 | 2.770049  | -6.638794 | 1.220356  |
| 6 | 1.297714  | -5.594169 | 2.922121  |
| 6 | 3.753280  | -5.697191 | 3.347681  |
| 6 | -4.026896 | 5.174872  | -0.482964 |
| 6 | -2.839253 | 6.599527  | 1.245865  |
| 6 | -1.352103 | 5.528893  | 2.913994  |
| 6 | -3.786212 | 5.760133  | 3.430292  |
| 6 | -3.029313 | -2.448843 | -2.564518 |
| 6 | -2.293799 | -4.609636 | -1.437109 |
| 6 | -0.372349 | -3.763833 | -0.033082 |
| 6 | -2.363457 | -4.833316 | 1.033378  |
| 6 | 2.570603  | 3.813348  | -2.839958 |
| 6 | 2.962404  | 1.573682  | -3.823188 |
| 6 | 4.858238  | 2.751885  | -2.694256 |
| 1 | 2.109008  | 5.645157  | -1.773591 |
| 1 | 3.625798  | 4.878621  | -1.295617 |
| 1 | 0.065333  | 5.187809  | -0.534412 |
| 1 | -0.194960 | 3.606768  | 0.253617  |
| 1 | -0.020458 | 3.690522  | -1.506498 |

|   |           |           |           |
|---|-----------|-----------|-----------|
| 1 | 2.145759  | 5.793931  | 0.747752  |
| 1 | 3.359062  | 4.533667  | 1.092282  |
| 1 | 1.704880  | 4.400868  | 1.748482  |
| 6 | 5.364482  | -4.999758 | -1.091658 |
| 6 | 3.988366  | -6.503992 | 0.324302  |
| 6 | 2.976972  | -5.410727 | -1.704099 |
| 1 | 1.852882  | -6.626987 | 0.606827  |
| 1 | 2.780031  | -7.607280 | 1.745572  |
| 1 | 1.125811  | -6.620103 | 3.282240  |
| 1 | 0.501171  | -5.341809 | 2.207396  |
| 1 | 1.206742  | -4.924975 | 3.789121  |
| 1 | 4.769632  | -5.661799 | 2.931305  |
| 1 | 3.677437  | -4.896749 | 4.098893  |
| 1 | 3.617263  | -6.662844 | 3.859669  |
| 6 | -5.441370 | 4.936356  | -1.033876 |
| 6 | -4.061483 | 6.460929  | 0.356576  |
| 6 | -3.060684 | 5.344437  | -1.666584 |
| 1 | -1.926672 | 6.555311  | 0.627450  |
| 1 | -2.828653 | 7.580382  | 1.747552  |
| 1 | -1.245316 | 4.851497  | 3.772874  |
| 1 | -0.602805 | 5.248909  | 2.158589  |
| 1 | -1.124084 | 6.547285  | 3.265086  |
| 1 | -3.732380 | 4.971972  | 4.196105  |
| 1 | -3.580382 | 6.726186  | 3.917380  |

|   |           |           |           |
|---|-----------|-----------|-----------|
| 1 | -4.815689 | 5.775554  | 3.045538  |
| 6 | -2.126957 | -3.690889 | -2.634184 |
| 6 | -2.545175 | -1.468622 | -3.643555 |
| 6 | -4.487884 | -2.834539 | -2.866024 |
| 1 | -1.682820 | -5.518429 | -1.561783 |
| 1 | -3.341570 | -4.946915 | -1.368542 |
| 1 | 0.124452  | -4.747999 | -0.073658 |
| 1 | -0.082226 | -3.273204 | 0.909620  |
| 1 | 0.023284  | -3.140021 | -0.848067 |
| 1 | -1.995014 | -4.488626 | 2.009660  |
| 1 | -3.461430 | -4.887672 | 1.078526  |
| 1 | -1.974332 | -5.851961 | 0.878384  |
| 1 | 1.528425  | 3.576086  | -3.111343 |
| 1 | 3.000125  | 4.361789  | -3.693622 |
| 1 | 1.909334  | 1.263403  | -3.749009 |
| 1 | 3.097558  | 2.111318  | -4.774415 |
| 1 | 3.585056  | 0.669467  | -3.865170 |
| 1 | 5.416726  | 1.818552  | -2.529273 |
| 1 | 5.152467  | 3.155323  | -3.675704 |
| 1 | 5.168734  | 3.464145  | -1.916904 |
| 1 | 6.073713  | -4.760922 | -0.285477 |
| 1 | 5.712038  | -5.913718 | -1.597778 |
| 1 | 5.394142  | -4.183868 | -1.827205 |
| 1 | 4.900825  | -6.498408 | 0.942616  |

|   |           |           |           |
|---|-----------|-----------|-----------|
| 1 | 4.076084  | -7.374093 | -0.345830 |
| 1 | 3.307593  | -6.239782 | -2.349041 |
| 1 | 1.958286  | -5.627955 | -1.352929 |
| 1 | 2.925323  | -4.498355 | -2.316279 |
| 1 | -6.145963 | 4.712320  | -0.219515 |
| 1 | -5.792012 | 5.840180  | -1.556074 |
| 1 | -5.472877 | 4.105021  | -1.751863 |
| 1 | -4.971377 | 6.458833  | 0.979210  |
| 1 | -4.152127 | 7.324801  | -0.321166 |
| 1 | -3.402472 | 6.159189  | -2.323863 |
| 1 | -2.041925 | 5.574730  | -1.326672 |
| 1 | -3.006896 | 4.422026  | -2.263506 |
| 1 | -1.076574 | -3.363689 | -2.703879 |
| 1 | -2.345801 | -4.231551 | -3.569148 |
| 1 | -1.561317 | -1.051805 | -3.380657 |
| 1 | -3.243640 | -0.634648 | -3.798312 |
| 1 | -2.452540 | -1.998233 | -4.604226 |
| 1 | -5.137470 | -1.948226 | -2.814749 |
| 1 | -4.569851 | -3.265704 | -3.876291 |
| 1 | -4.871734 | -3.566594 | -2.141517 |

**Table S10**

**[Sb-Rea]<sup>1</sup>**

E : -3034.29490835 Hartree

G : -3032.965122 Hartree

---

| Atomic | Coordinates (Angstroms) |           |          |
|--------|-------------------------|-----------|----------|
| Number | X                       | Y         | Z        |
| 51     | 0.000393                | -0.000048 | 0.088042 |
| 6      | 0.000192                | -0.000038 | 2.245081 |
| 6      | 1.182277                | -0.052812 | 2.996859 |
| 6      | -1.181975               | 0.052783  | 2.996756 |
| 6      | 2.582817                | -0.173214 | 2.425144 |
| 6      | 1.195454                | -0.009400 | 4.392097 |
| 6      | -2.582517               | 0.173208  | 2.425000 |
| 6      | -1.195224               | 0.009505  | 4.392006 |
| 6      | 3.479321                | 0.167450  | 3.652845 |
| 6      | 2.780256                | 0.735188  | 1.223698 |
| 6      | 2.847463                | -1.541275 | 1.795047 |
| 6      | 2.613020                | 0.039599  | 4.942318 |
| 6      | 0.000090                | 0.000087  | 5.115170 |
| 6      | -3.479043               | -0.167453 | 3.652680 |
| 6      | -2.847172               | 1.541287  | 1.794949 |
| 6      | -2.780068               | -0.735167 | 1.223548 |
| 6      | -2.612817               | -0.039343 | 4.942164 |
| 1      | 4.373858                | -0.470842 | 3.686852 |

---

|   |           |           |           |
|---|-----------|-----------|-----------|
| 1 | 3.825171  | 1.206820  | 3.549608  |
| 6 | 3.166694  | 0.009293  | 0.082963  |
| 6 | 2.555544  | 2.099584  | 1.133907  |
| 6 | 3.241675  | -1.415899 | 0.452680  |
| 6 | 2.681702  | -2.801234 | 2.336497  |
| 6 | 2.798378  | 1.269610  | 5.839739  |
| 6 | 2.954364  | -1.219311 | 5.749922  |
| 1 | 0.000051  | 0.000164  | 6.209042  |
| 1 | -4.373657 | 0.470736  | 3.686580  |
| 1 | -3.824756 | -1.206878 | 3.549530  |
| 6 | -3.241514 | 1.415951  | 0.452619  |
| 6 | -2.681345 | 2.801226  | 2.336427  |
| 6 | -3.166611 | -0.009240 | 0.082866  |
| 6 | -2.555494 | -2.099587 | 1.133733  |
| 6 | -2.798257 | -1.269140 | 5.839862  |
| 6 | -2.954172 | 1.219773  | 5.749438  |
| 6 | 3.329631  | 0.673264  | -1.130142 |
| 6 | 2.702757  | 2.780413  | -0.084285 |
| 1 | 2.205639  | 2.633974  | 2.020659  |
| 6 | 3.530824  | -2.543232 | -0.299259 |
| 6 | 2.956512  | -3.960506 | 1.586186  |
| 1 | 2.304745  | -2.897939 | 3.355243  |
| 1 | 2.513459  | 2.187850  | 5.305015  |
| 1 | 2.176552  | 1.195124  | 6.744760  |

|   |           |           |           |
|---|-----------|-----------|-----------|
| 1 | 3.849122  | 1.362019  | 6.156209  |
| 1 | 2.261286  | -1.335433 | 6.596808  |
| 1 | 3.977422  | -1.153229 | 6.151246  |
| 1 | 2.890673  | -2.126186 | 5.133905  |
| 6 | -3.530676 | 2.543311  | -0.299274 |
| 6 | -2.956174 | 3.960527  | 1.586167  |
| 1 | -2.304341 | 2.897882  | 3.355161  |
| 6 | -3.329711 | -0.673193 | -1.130230 |
| 6 | -2.702907 | -2.780399 | -0.084443 |
| 1 | -2.205589 | -2.634023 | 2.020460  |
| 1 | -2.513316 | -2.187512 | 5.305377  |
| 1 | -2.176495 | -1.194449 | 6.744910  |
| 1 | -3.849026 | -1.361456 | 6.156280  |
| 1 | -2.261127 | 1.336098  | 6.596323  |
| 1 | -3.977250 | 1.153813  | 6.150734  |
| 1 | -2.890440 | 2.126487  | 5.133184  |
| 6 | 3.091465  | 2.054295  | -1.234592 |
| 1 | 3.624688  | 0.105643  | -2.014093 |
| 6 | 2.295037  | 4.254675  | -0.128031 |
| 6 | 3.419471  | -3.828436 | 0.258894  |
| 1 | 3.829838  | -2.431135 | -1.343459 |
| 6 | 2.777436  | -5.319308 | 2.271764  |
| 6 | -3.419216 | 3.828498  | 0.258896  |
| 1 | -3.829805 | 2.431247  | -1.343445 |

|   |           |           |           |
|---|-----------|-----------|-----------|
| 6 | -2.777139 | 5.319314  | 2.271797  |
| 6 | -3.091643 | -2.054242 | -1.234718 |
| 1 | -3.624862 | -0.105549 | -2.014133 |
| 6 | -2.295444 | -4.254728 | -0.128181 |
| 6 | 3.279375  | 2.718917  | -2.603303 |
| 6 | 2.829138  | 4.918792  | -1.404365 |
| 6 | 0.756600  | 4.321586  | -0.090863 |
| 6 | 2.850475  | 5.028223  | 1.076171  |
| 6 | 3.765188  | -5.028947 | -0.630432 |
| 6 | 2.756513  | -6.440959 | 1.223366  |
| 6 | 1.455924  | -5.386280 | 3.052023  |
| 6 | 3.937878  | -5.529420 | 3.260452  |
| 6 | -3.764951 | 5.029036  | -0.630382 |
| 6 | -2.756352 | 6.441030  | 1.223462  |
| 6 | -1.455594 | 5.386365  | 3.051989  |
| 6 | -3.937538 | 5.529282  | 3.260571  |
| 6 | -3.279826 | -2.718885 | -2.603388 |
| 6 | -2.829749 | -4.918793 | -1.404456 |
| 6 | -0.757017 | -4.321934 | -0.091111 |
| 6 | -2.850947 | -5.028120 | 1.076092  |
| 6 | 2.569582  | 4.081205  | -2.643751 |
| 6 | 2.687531  | 1.856695  | -3.728311 |
| 6 | 4.786551  | 2.897942  | -2.855693 |
| 1 | 2.363969  | 5.912324  | -1.507299 |

|   |           |           |           |
|---|-----------|-----------|-----------|
| 1 | 3.912240  | 5.093052  | -1.291037 |
| 1 | 0.426599  | 5.373696  | -0.060824 |
| 1 | 0.361181  | 3.801395  | 0.795422  |
| 1 | 0.300090  | 3.829140  | -0.961201 |
| 1 | 2.643237  | 6.101836  | 0.948468  |
| 1 | 3.939165  | 4.895678  | 1.163803  |
| 1 | 2.386740  | 4.717756  | 2.022928  |
| 6 | 5.110530  | -4.813231 | -1.339691 |
| 6 | 3.880811  | -6.308399 | 0.212025  |
| 6 | 2.667770  | -5.198802 | -1.694581 |
| 1 | 1.784344  | -6.418415 | 0.702492  |
| 1 | 2.810887  | -7.412485 | 1.740275  |
| 1 | 1.312501  | -6.406270 | 3.440757  |
| 1 | 0.603783  | -5.143296 | 2.401037  |
| 1 | 1.439037  | -4.702452 | 3.912121  |
| 1 | 4.913689  | -5.506631 | 2.755362  |
| 1 | 3.942105  | -4.733462 | 4.020179  |
| 1 | 3.832457  | -6.496820 | 3.776315  |
| 6 | -5.110252 | 4.813307  | -1.339711 |
| 6 | -3.880653 | 6.308442  | 0.212129  |
| 6 | -2.667476 | 5.198985  | -1.694460 |
| 1 | -1.784192 | 6.418608  | 0.702568  |
| 1 | -2.810806 | 7.412520  | 1.740432  |
| 1 | -1.438614 | 4.702536  | 3.912084  |

|   |           |           |           |
|---|-----------|-----------|-----------|
| 1 | -0.603464 | 5.143450  | 2.400960  |
| 1 | -1.312225 | 6.406361  | 3.440725  |
| 1 | -3.941613 | 4.733316  | 4.020290  |
| 1 | -3.832198 | 6.496692  | 3.776434  |
| 1 | -4.913382 | 5.506377  | 2.755551  |
| 6 | -2.570200 | -4.081257 | -2.643877 |
| 6 | -2.688040 | -1.856803 | -3.728535 |
| 6 | -4.787059 | -2.897744 | -2.855554 |
| 1 | -2.364713 | -5.912384 | -1.507416 |
| 1 | -3.912863 | -5.092917 | -1.291029 |
| 1 | -0.427241 | -5.374114 | -0.061041 |
| 1 | -0.361416 | -3.801788 | 0.795120  |
| 1 | -0.300463 | -3.829633 | -0.961508 |
| 1 | -2.387137 | -4.717645 | 2.022810  |
| 1 | -3.939615 | -4.895422 | 1.163754  |
| 1 | -2.643856 | -6.101770 | 0.948457  |
| 1 | 1.485931  | 3.913617  | -2.755232 |
| 1 | 2.894457  | 4.618962  | -3.548894 |
| 1 | 1.643725  | 1.587591  | -3.506846 |
| 1 | 2.705768  | 2.423607  | -4.671700 |
| 1 | 3.256112  | 0.931161  | -3.893830 |
| 1 | 5.300981  | 1.926049  | -2.826205 |
| 1 | 4.957058  | 3.349085  | -3.845755 |
| 1 | 5.251302  | 3.540541  | -2.094639 |

|   |           |           |           |
|---|-----------|-----------|-----------|
| 1 | 5.903767  | -4.580903 | -0.613910 |
| 1 | 5.393941  | -5.730179 | -1.879351 |
| 1 | 5.068938  | -3.997800 | -2.075130 |
| 1 | 4.850384  | -6.306349 | 0.736668  |
| 1 | 3.898606  | -7.176942 | -0.465714 |
| 1 | 2.919332  | -6.027746 | -2.374631 |
| 1 | 1.691328  | -5.406025 | -1.235864 |
| 1 | 2.560603  | -4.282124 | -2.293369 |
| 1 | -5.903521 | 4.580935  | -0.613978 |
| 1 | -5.393664 | 5.730264  | -1.879356 |
| 1 | -5.068602 | 3.997902  | -2.075174 |
| 1 | -4.850225 | 6.306319  | 0.736772  |
| 1 | -3.898497 | 7.177010  | -0.465576 |
| 1 | -2.919026 | 6.027961  | -2.374477 |
| 1 | -1.691068 | 5.406213  | -1.235672 |
| 1 | -2.560247 | 4.282344  | -2.293293 |
| 1 | -1.486539 | -3.913798 | -2.755458 |
| 1 | -2.895222 | -4.618992 | -3.548980 |
| 1 | -1.644187 | -1.587761 | -3.507212 |
| 1 | -3.256568 | -0.931241 | -3.894080 |
| 1 | -2.706427 | -2.423796 | -4.671872 |
| 1 | -5.301365 | -1.925786 | -2.826044 |
| 1 | -4.957763 | -3.348921 | -3.845567 |
| 1 | -5.251780 | -3.540244 | -2.094398 |

---

**Table S11****[Bi-Rea]<sup>1</sup>**

E : -3008.63354730 Hartree

G : -3007.303814 Hartree

---

| Atomic<br>Number | Coordinates (Angstroms) |           |           |
|------------------|-------------------------|-----------|-----------|
|                  | X                       | Y         | Z         |
| 83               | 0.000441                | 0.000179  | -0.033894 |
| 6                | -0.000928               | -0.000258 | 2.241499  |
| 6                | 1.180517                | -0.069466 | 2.993214  |
| 6                | -1.183195               | 0.068634  | 2.991948  |
| 6                | 2.592517                | -0.200226 | 2.432752  |
| 6                | 1.192698                | -0.027986 | 4.390096  |
| 6                | -2.594577               | 0.199683  | 2.429978  |
| 6                | -1.196910               | 0.026583  | 4.388795  |
| 6                | 3.487188                | 0.094899  | 3.671345  |
| 6                | 2.796396                | 0.732941  | 1.251895  |
| 6                | 2.833890                | -1.557731 | 1.772892  |
| 6                | 2.604722                | 0.002068  | 4.952417  |
| 6                | -0.002501               | -0.000853 | 5.110742  |
| 6                | -3.490622               | -0.095842 | 3.667474  |

|   |           |           |           |
|---|-----------|-----------|-----------|
| 6 | -2.835066 | 1.557450  | 1.770333  |
| 6 | -2.797134 | -0.733046 | 1.248537  |
| 6 | -2.609550 | -0.003615 | 4.949550  |
| 1 | 4.348301  | -0.587533 | 3.711693  |
| 1 | 3.888745  | 1.114871  | 3.577358  |
| 6 | 3.082000  | 0.019323  | 0.074614  |
| 6 | 2.635032  | 2.106789  | 1.206076  |
| 6 | 3.152096  | -1.414272 | 0.413207  |
| 6 | 2.723773  | -2.825992 | 2.310260  |
| 6 | 2.805021  | 1.241170  | 5.834420  |
| 6 | 2.910551  | -1.251340 | 5.782222  |
| 1 | -0.003104 | -0.001078 | 6.204794  |
| 1 | -4.351713 | 0.586656  | 3.707158  |
| 1 | -3.892179 | -1.115736 | 3.572637  |
| 6 | -3.151538 | 1.414520  | 0.410189  |
| 6 | -2.725556 | 2.825507  | 2.308308  |
| 6 | -3.081070 | -0.018948 | 0.071141  |
| 6 | -2.635961 | -2.106903 | 1.202423  |
| 6 | -2.810906 | -1.243061 | 5.830824  |
| 6 | -2.916191 | 1.249481  | 5.779532  |
| 6 | 3.178088  | 0.702584  | -1.137196 |
| 6 | 2.719309  | 2.807481  | -0.006671 |
| 1 | 2.370406  | 2.636249  | 2.124653  |
| 6 | 3.401623  | -2.530051 | -0.370428 |

|   |           |           |           |
|---|-----------|-----------|-----------|
| 6 | 2.969024  | -3.973333 | 1.532754  |
| 1 | 2.427031  | -2.939203 | 3.353182  |
| 1 | 2.550054  | 2.157341  | 5.281251  |
| 1 | 2.167194  | 1.195799  | 6.730136  |
| 1 | 3.852641  | 1.314337  | 6.166118  |
| 1 | 2.218532  | -1.329004 | 6.634365  |
| 1 | 3.937336  | -1.212057 | 6.177608  |
| 1 | 2.810606  | -2.167547 | 5.184725  |
| 6 | -3.400084 | 2.530598  | -0.373327 |
| 6 | -2.969807 | 3.973153  | 1.530930  |
| 1 | -2.430139 | 2.938311  | 3.351652  |
| 6 | -3.175499 | -0.701717 | -1.141072 |
| 6 | -2.718648 | -2.807119 | -0.010720 |
| 1 | -2.372716 | -2.636766 | 2.121163  |
| 1 | -2.555435 | -2.159029 | 5.277549  |
| 1 | -2.174026 | -1.198119 | 6.727236  |
| 1 | -3.858884 | -1.316267 | 6.161375  |
| 1 | -2.225104 | 1.326740  | 6.632467  |
| 1 | -3.943413 | 1.210120  | 6.173772  |
| 1 | -2.815512 | 2.165923  | 5.182518  |
| 6 | 2.979107  | 2.092271  | -1.199115 |
| 1 | 3.387652  | 0.142674  | -2.050394 |
| 6 | 2.358322  | 4.293944  | 0.009482  |
| 6 | 3.335598  | -3.822098 | 0.176793  |

|   |           |           |           |
|---|-----------|-----------|-----------|
| 1 | 3.637896  | -2.401714 | -1.428651 |
| 6 | 2.881908  | -5.340344 | 2.219894  |
| 6 | -3.334775 | 3.822431  | 0.174481  |
| 1 | -3.635074 | 2.402674  | -1.431888 |
| 6 | -2.883341 | 5.339908  | 2.218667  |
| 6 | -2.976537 | -2.091400 | -1.203263 |
| 1 | -3.383692 | -0.141429 | -2.054353 |
| 6 | -2.358060 | -4.293680 | 0.005384  |
| 6 | 3.056179  | 2.774356  | -2.569757 |
| 6 | 2.777510  | 4.964476  | -1.305679 |
| 6 | 0.833454  | 4.394997  | 0.203173  |
| 6 | 3.056485  | 5.031821  | 1.160100  |
| 6 | 3.625016  | -5.009808 | -0.749541 |
| 6 | 2.797458  | -6.455745 | 1.168171  |
| 6 | 1.637926  | -5.447256 | 3.114047  |
| 6 | 4.130556  | -5.525979 | 3.100587  |
| 6 | -3.623329 | 5.010471  | -0.751691 |
| 6 | -2.797816 | 6.455697  | 1.167444  |
| 6 | -1.640205 | 5.446430  | 3.114055  |
| 6 | -4.132823 | 5.525293  | 3.098219  |
| 6 | -3.051434 | -2.772851 | -2.574346 |
| 6 | -2.775417 | -4.963544 | -1.310701 |
| 6 | -0.833524 | -4.395209 | 0.201382  |
| 6 | -3.058215 | -5.031841 | 1.154607  |

|   |           |           |           |
|---|-----------|-----------|-----------|
| 6 | 2.374814  | 4.151123  | -2.522508 |
| 6 | 2.339925  | 1.944118  | -3.645523 |
| 6 | 4.536113  | 2.924301  | -2.961986 |
| 1 | 2.328629  | 5.969815  | -1.348537 |
| 1 | 3.870298  | 5.112698  | -1.300340 |
| 1 | 0.522945  | 5.453000  | 0.236225  |
| 1 | 0.528374  | 3.908877  | 1.142424  |
| 1 | 0.281932  | 3.880766  | -0.596970 |
| 1 | 2.856333  | 6.111207  | 1.077775  |
| 1 | 4.145539  | 4.880006  | 1.123321  |
| 1 | 2.695410  | 4.707353  | 2.145888  |
| 6 | 4.901739  | -4.768577 | -1.568868 |
| 6 | 3.830699  | -6.294333 | 0.067707  |
| 6 | 2.444006  | -5.189707 | -1.718956 |
| 1 | 1.784917  | -6.451390 | 0.730434  |
| 1 | 2.915361  | -7.428877 | 1.671331  |
| 1 | 1.555043  | -6.473807 | 3.503085  |
| 1 | 0.725189  | -5.219776 | 2.545337  |
| 1 | 1.682028  | -4.771984 | 3.979942  |
| 1 | 5.057370  | -5.469798 | 2.512651  |
| 1 | 4.178702  | -4.737256 | 3.866331  |
| 1 | 4.098046  | -6.500921 | 3.612096  |
| 6 | -4.899235 | 4.769427  | -1.572343 |
| 6 | -3.829915 | 6.294670  | 0.065849  |

|   |           |           |           |
|---|-----------|-----------|-----------|
| 6 | -2.441404 | 5.190821  | -1.719901 |
| 1 | -1.784824 | 6.451514  | 0.730751  |
| 1 | -2.916245 | 7.428643  | 1.670840  |
| 1 | -1.685177 | 4.770843  | 3.979657  |
| 1 | -0.726939 | 5.219097  | 2.546132  |
| 1 | -1.557631 | 6.472836  | 3.503541  |
| 1 | -4.181772 | 4.736290  | 3.863621  |
| 1 | -4.100736 | 6.500040  | 3.610127  |
| 1 | -5.059074 | 5.469409  | 2.509364  |
| 6 | -2.370529 | -4.149826 | -2.526555 |
| 6 | -2.333030 | -1.942304 | -3.648446 |
| 6 | -4.530706 | -2.922210 | -2.969267 |
| 1 | -2.326827 | -5.969025 | -1.353265 |
| 1 | -3.868267 | -5.111375 | -1.307125 |
| 1 | -0.523272 | -5.453293 | 0.234246  |
| 1 | -0.529822 | -3.909760 | 1.141423  |
| 1 | -0.280655 | -3.880569 | -0.597569 |
| 1 | -2.698636 | -4.707831 | 2.141091  |
| 1 | -4.147173 | -4.879762 | 1.116153  |
| 1 | -2.858179 | -6.111241 | 1.072186  |
| 1 | 1.281708  | 4.006516  | -2.523782 |
| 1 | 2.617867  | 4.694847  | -3.449482 |
| 1 | 1.314251  | 1.699117  | -3.330016 |
| 1 | 2.284294  | 2.524793  | -4.579009 |

|   |           |           |           |
|---|-----------|-----------|-----------|
| 1 | 2.865909  | 1.007289  | -3.876047 |
| 1 | 5.026746  | 1.940350  | -2.998716 |
| 1 | 4.623155  | 3.390696  | -3.955832 |
| 1 | 5.087173  | 3.540491  | -2.237703 |
| 1 | 5.748435  | -4.519650 | -0.912271 |
| 1 | 5.156639  | -5.680746 | -2.130327 |
| 1 | 4.783009  | -3.956067 | -2.299079 |
| 1 | 4.840744  | -6.281076 | 0.509185  |
| 1 | 3.805355  | -7.156429 | -0.618056 |
| 1 | 2.657753  | -5.998509 | -2.435278 |
| 1 | 1.516596  | -5.433840 | -1.182909 |
| 1 | 2.261508  | -4.264758 | -2.286459 |
| 1 | -5.746545 | 4.520205  | -0.916652 |
| 1 | -5.153661 | 5.681770  | -2.133733 |
| 1 | -4.779732 | 3.957172  | -2.302712 |
| 1 | -4.840409 | 6.281186  | 0.506292  |
| 1 | -3.803917 | 7.157036  | -0.619549 |
| 1 | -2.654521 | 5.999875  | -2.436124 |
| 1 | -1.514533 | 5.434822  | -1.182868 |
| 1 | -2.258284 | 4.266103  | -2.287580 |
| 1 | -1.277383 | -4.005522 | -2.525997 |
| 1 | -2.612232 | -4.693104 | -3.454144 |
| 1 | -1.307834 | -1.697801 | -3.331000 |
| 1 | -2.858305 | -1.005188 | -3.879422 |

|   |           |           |           |
|---|-----------|-----------|-----------|
| 1 | -2.275941 | -2.522533 | -4.582122 |
| 1 | -5.021052 | -1.938128 | -3.006305 |
| 1 | -4.616099 | -3.388015 | -3.963531 |
| 1 | -5.083184 | -3.538694 | -2.246314 |

---

### Table S12

[N-TS]<sup>3</sup>

E : -3313.85538652 Hartree

G : -3312.32141363 Hartree

---

| Atomic | Coordinates (Angstroms) |           |           |
|--------|-------------------------|-----------|-----------|
| Number | X                       | Y         | Z         |
| 7      | 0.199435                | -0.672011 | -0.200261 |
| 6      | 1.453181                | 0.802512  | 0.240453  |
| 6      | 0.826617                | 1.880966  | 0.231096  |
| 6      | 0.841954                | -1.879819 | -0.190386 |
| 6      | 1.630174                | -2.348418 | -1.265903 |
| 6      | 0.624623                | -2.779371 | 0.879884  |
| 6      | 2.041509                | -1.561565 | -2.490044 |
| 6      | 2.107268                | -3.657543 | -1.298586 |
| 6      | -0.246396               | -2.514443 | 2.090113  |
| 6      | 1.166428                | -4.059045 | 0.875597  |

|   |           |           |           |
|---|-----------|-----------|-----------|
| 6 | 2.467818  | -2.696886 | -3.469222 |
| 6 | 3.137750  | -0.546539 | -2.163311 |
| 6 | 0.956294  | -0.642387 | -3.028048 |
| 6 | 2.773771  | -3.973327 | -2.631668 |
| 6 | 1.902786  | -4.523603 | -0.220703 |
| 6 | 0.043590  | -3.759058 | 2.986851  |
| 6 | -1.713511 | -2.328893 | 1.698782  |
| 6 | 0.043743  | -1.178790 | 2.763804  |
| 6 | 0.817047  | -4.819208 | 2.145187  |
| 1 | 3.316234  | -2.391894 | -4.098116 |
| 1 | 1.617992  | -2.900111 | -4.137934 |
| 6 | 2.782043  | 0.734181  | -2.612409 |
| 6 | 4.281619  | -0.712353 | -1.403069 |
| 6 | 1.422579  | 0.672320  | -3.167611 |
| 6 | -0.384339 | -0.921479 | -3.205575 |
| 6 | 4.279375  | -4.228804 | -2.481136 |
| 6 | 2.125201  | -5.207205 | -3.271470 |
| 1 | 2.290743  | -5.546016 | -0.241582 |
| 1 | -0.888276 | -4.167819 | 3.402493  |
| 1 | 0.662431  | -3.439795 | 3.837816  |
| 6 | -2.190658 | -1.075147 | 2.113351  |
| 6 | -2.559034 | -3.196429 | 1.035169  |
| 6 | -1.093075 | -0.358170 | 2.778637  |
| 6 | 1.238031  | -0.710635 | 3.277551  |

|   |           |           |           |
|---|-----------|-----------|-----------|
| 6 | -0.046725 | -6.047873 | 1.833702  |
| 6 | 2.091254  | -5.269073 | 2.870333  |
| 6 | 3.580870  | 1.823888  | -2.299042 |
| 6 | 5.104242  | 0.381689  | -1.074913 |
| 1 | 4.515695  | -1.697493 | -0.999095 |
| 6 | 0.562918  | 1.667482  | -3.607966 |
| 6 | -1.292258 | 0.102691  | -3.526415 |
| 1 | -0.752958 | -1.929970 | -2.997160 |
| 1 | 4.465023  | -5.054001 | -1.776815 |
| 1 | 4.715998  | -4.505315 | -3.452941 |
| 1 | 4.810740  | -3.340211 | -2.116926 |
| 1 | 2.333585  | -6.114443 | -2.683973 |
| 1 | 2.520577  | -5.364220 | -4.286897 |
| 1 | 1.034177  | -5.084603 | -3.338124 |
| 6 | -3.498824 | -0.704759 | 1.835569  |
| 6 | -3.906232 | -2.861639 | 0.792117  |
| 1 | -2.178051 | -4.162238 | 0.696475  |
| 6 | -1.025866 | 0.907861  | 3.339389  |
| 6 | 1.332826  | 0.584964  | 3.820260  |
| 1 | 2.124952  | -1.348816 | 3.234268  |
| 1 | 0.489035  | -6.746230 | 1.173100  |
| 1 | -0.302270 | -6.582767 | 2.761116  |
| 1 | -0.983869 | -5.763047 | 1.335388  |
| 1 | 2.656376  | -5.993290 | 2.263928  |

|   |           |           |           |
|---|-----------|-----------|-----------|
| 1 | 1.840228  | -5.750178 | 3.828235  |
| 1 | 2.747067  | -4.409781 | 3.074916  |
| 6 | 4.742700  | 1.671181  | -1.525363 |
| 1 | 3.259310  | 2.822843  | -2.600117 |
| 6 | 6.382903  | 0.117502  | -0.274457 |
| 6 | -0.799184 | 1.391871  | -3.818988 |
| 1 | 0.936130  | 2.684704  | -3.748534 |
| 6 | -2.786375 | -0.213403 | -3.423182 |
| 6 | -4.373134 | -1.585188 | 1.172278  |
| 1 | -3.852893 | 0.280882  | 2.147695  |
| 6 | -4.795502 | -3.926070 | 0.134434  |
| 6 | 0.175910  | 1.392111  | 3.882904  |
| 1 | -1.914771 | 1.542761  | 3.342203  |
| 6 | 2.699500  | 1.062601  | 4.320885  |
| 6 | 5.489359  | 2.939471  | -1.096480 |
| 6 | 6.845993  | 1.408374  | 0.415722  |
| 6 | 6.169484  | -0.944978 | 0.812328  |
| 6 | 7.463266  | -0.393019 | -1.244995 |
| 6 | -1.694431 | 2.520850  | -4.338834 |
| 6 | -3.204444 | -1.206755 | -4.517559 |
| 6 | -3.608800 | 1.080504  | -3.527009 |
| 6 | -3.071758 | -0.833419 | -2.045800 |
| 6 | -5.816368 | -1.130056 | 0.929191  |
| 6 | -6.275265 | -3.516697 | 0.206497  |

|   |           |           |           |
|---|-----------|-----------|-----------|
| 6 | -4.383636 | -4.128067 | -1.333529 |
| 6 | -4.646247 | -5.268386 | 0.869241  |
| 6 | 0.163583  | 2.799180  | 4.492573  |
| 6 | 2.691277  | 2.588024  | 4.493748  |
| 6 | 3.023067  | 0.368234  | 5.654536  |
| 6 | 3.802617  | 0.715763  | 3.310016  |
| 6 | 6.875718  | 2.595087  | -0.531633 |
| 6 | 5.688440  | 3.900599  | -2.276745 |
| 6 | 4.645133  | 3.644259  | -0.017910 |
| 1 | 7.843450  | 1.239847  | 0.852762  |
| 1 | 6.166890  | 1.619005  | 1.259342  |
| 1 | 5.305444  | -0.692371 | 1.443368  |
| 1 | 7.061817  | -0.996483 | 1.454796  |
| 1 | 6.011162  | -1.949267 | 0.394828  |
| 1 | 7.133267  | -1.328142 | -1.722008 |
| 1 | 8.402011  | -0.593196 | -0.704472 |
| 1 | 7.667658  | 0.329827  | -2.046899 |
| 6 | -3.103859 | 1.986097  | -4.636352 |
| 6 | -1.769699 | 3.643553  | -3.294825 |
| 6 | -1.112874 | 3.087226  | -5.642748 |
| 1 | -2.610444 | -2.130532 | -4.454076 |
| 1 | -4.266208 | -1.476909 | -4.402254 |
| 1 | -3.060346 | -0.787487 | -5.523889 |
| 1 | -3.551042 | 1.615792  | -2.562859 |

|   |           |           |           |
|---|-----------|-----------|-----------|
| 1 | -4.668901 | 0.819455  | -3.678303 |
| 1 | -2.715079 | -0.177702 | -1.236561 |
| 1 | -4.157721 | -0.975624 | -1.922676 |
| 1 | -2.592136 | -1.813168 | -1.909102 |
| 6 | -6.488233 | -2.045883 | -0.104509 |
| 6 | -5.867384 | 0.308132  | 0.389598  |
| 6 | -6.584820 | -1.172924 | 2.261677  |
| 1 | -6.661976 | -3.737822 | 1.214491  |
| 1 | -6.850600 | -4.148679 | -0.488767 |
| 1 | -3.309671 | -4.355216 | -1.413335 |
| 1 | -4.944959 | -4.968921 | -1.769764 |
| 1 | -4.578561 | -3.231778 | -1.937716 |
| 1 | -4.822515 | -5.146161 | 1.948173  |
| 1 | -5.381867 | -5.987880 | 0.477238  |
| 1 | -3.648422 | -5.709021 | 0.732439  |
| 6 | 1.469806  | 3.072567  | 5.253370  |
| 6 | -0.998683 | 2.947443  | 5.486176  |
| 6 | -0.015757 | 3.830999  | 3.367990  |
| 1 | 3.617339  | 2.893090  | 5.007203  |
| 1 | 2.716351  | 3.055151  | 3.494471  |
| 1 | 3.039028  | -0.724093 | 5.524356  |
| 1 | 4.011601  | 0.685063  | 6.022937  |
| 1 | 2.273425  | 0.596206  | 6.425016  |
| 1 | 3.547193  | 1.093076  | 2.307065  |

|   |           |           |           |
|---|-----------|-----------|-----------|
| 1 | 4.752610  | 1.178272  | 3.622615  |
| 1 | 3.974391  | -0.367472 | 3.240954  |
| 1 | 7.278989  | 3.485105  | -0.022340 |
| 1 | 7.561523  | 2.382401  | -1.367989 |
| 1 | 6.184390  | 3.392988  | -3.117242 |
| 1 | 6.321296  | 4.744558  | -1.961582 |
| 1 | 4.739878  | 4.319548  | -2.639821 |
| 1 | 3.640291  | 3.876102  | -0.401280 |
| 1 | 5.127194  | 4.584507  | 0.293032  |
| 1 | 4.512808  | 3.008749  | 0.870014  |
| 1 | -3.783130 | 2.840127  | -4.789646 |
| 1 | -3.084767 | 1.427332  | -5.587272 |
| 1 | -0.772193 | 4.053779  | -3.079644 |
| 1 | -2.404299 | 4.467598  | -3.660803 |
| 1 | -2.178761 | 3.278071  | -2.343103 |
| 1 | -0.980577 | 2.291688  | -6.390857 |
| 1 | -1.797671 | 3.843148  | -6.058246 |
| 1 | -0.138463 | 3.569832  | -5.481476 |
| 1 | -7.563564 | -1.809059 | -0.143938 |
| 1 | -6.081877 | -1.814949 | -1.104071 |
| 1 | -5.215167 | 0.426857  | -0.489323 |
| 1 | -6.898066 | 0.554706  | 0.091175  |
| 1 | -5.564935 | 1.044101  | 1.149054  |
| 1 | -6.111959 | -0.506350 | 2.997840  |

|   |           |           |           |
|---|-----------|-----------|-----------|
| 1 | -7.625392 | -0.842413 | 2.115969  |
| 1 | -6.596142 | -2.182934 | 2.694201  |
| 1 | 1.540235  | 4.152987  | 5.456955  |
| 1 | 1.426476  | 2.575560  | 6.236451  |
| 1 | -0.966005 | 2.156561  | 6.250181  |
| 1 | -0.927337 | 3.921931  | 5.993993  |
| 1 | -1.977805 | 2.904920  | 4.988866  |
| 1 | -0.944743 | 3.645636  | 2.806587  |
| 1 | -0.062901 | 4.848816  | 3.787151  |
| 1 | 0.811483  | 3.785600  | 2.644638  |
| 1 | 2.376268  | 0.250508  | 0.364306  |
| 6 | -0.373255 | 2.664530  | 0.142328  |
| 6 | -0.387893 | 4.053484  | -0.012520 |
| 6 | -1.599916 | 1.983978  | 0.262107  |
| 6 | -1.596419 | 4.752114  | -0.019410 |
| 1 | 0.556913  | 4.591841  | -0.106907 |
| 6 | -2.793014 | 2.689455  | 0.249133  |
| 1 | -1.586592 | 0.898377  | 0.370233  |
| 6 | -2.821430 | 4.088652  | 0.114845  |
| 1 | -1.568349 | 5.834991  | -0.136187 |
| 1 | -3.726262 | 2.129523  | 0.339377  |
| 6 | -4.171824 | 4.806979  | 0.106820  |
| 6 | -4.019416 | 6.310533  | -0.134763 |
| 1 | -5.010791 | 6.786461  | -0.145905 |

|   |           |          |           |
|---|-----------|----------|-----------|
| 1 | -3.425850 | 6.789470 | 0.657835  |
| 1 | -3.535378 | 6.513839 | -1.101787 |
| 6 | -5.050830 | 4.217833 | -1.010151 |
| 1 | -5.249291 | 3.147699 | -0.849037 |
| 1 | -6.020346 | 4.738049 | -1.044878 |
| 1 | -4.562018 | 4.328138 | -1.990156 |
| 6 | -4.858786 | 4.590780 | 1.465493  |
| 1 | -4.242965 | 4.996628 | 2.282090  |
| 1 | -5.838004 | 5.093550 | 1.484445  |
| 1 | -5.022535 | 3.521079 | 1.663319  |

---

**Table S13**

**[P-TS]<sup>3</sup>**

E : -3600.44991511 Hartree

G : -3598.909518 Hartree

---

| Atomic<br>Number | Coordinates (Angstroms) |           |           |
|------------------|-------------------------|-----------|-----------|
|                  | X                       | Y         | Z         |
| 15               | 0.000000                | 0.000000  | 0.000000  |
| 6                | 0.000000                | 0.000000  | 2.382000  |
| 6                | 1.132412                | 0.000000  | 2.887798  |
| 6                | -1.724679               | -0.608711 | -0.095656 |

|   |           |           |           |
|---|-----------|-----------|-----------|
| 6 | -2.038042 | -1.982568 | -0.027565 |
| 6 | -2.819285 | 0.270239  | -0.253825 |
| 6 | -1.067587 | -3.142660 | 0.134426  |
| 6 | -3.354048 | -2.448309 | -0.124731 |
| 6 | -2.763447 | 1.770542  | -0.525835 |
| 6 | -4.137468 | -0.191392 | -0.290879 |
| 6 | -1.940566 | -4.366112 | -0.287393 |
| 6 | -0.480424 | -3.269020 | 1.539796  |
| 6 | 0.201606  | -3.041649 | -0.693494 |
| 6 | -3.432285 | -3.966872 | -0.144065 |
| 6 | -4.419466 | -1.556399 | -0.230439 |
| 6 | -4.256317 | 2.205732  | -0.417262 |
| 6 | -2.127625 | 2.044381  | -1.888418 |
| 6 | -1.842168 | 2.563819  | 0.388870  |
| 6 | -5.149727 | 0.933379  | -0.420561 |
| 1 | -1.682848 | -5.265659 | 0.289695  |
| 1 | -1.728322 | -4.580400 | -1.345551 |
| 6 | 0.910778  | -3.466090 | 1.481634  |
| 6 | -1.100312 | -3.160647 | 2.768997  |
| 6 | 1.340503  | -3.298155 | 0.084506  |
| 6 | 0.331976  | -2.627752 | -2.003657 |
| 6 | -4.064229 | -4.523540 | 1.138895  |
| 6 | -4.244471 | -4.455480 | -1.349096 |
| 1 | -5.450250 | -1.918452 | -0.288376 |

|   |           |           |           |
|---|-----------|-----------|-----------|
| 1 | -4.521184 | 2.898116  | -1.228918 |
| 1 | -4.393947 | 2.751886  | 0.527106  |
| 6 | -1.012460 | 2.887707  | -1.765468 |
| 6 | -2.505864 | 1.583913  | -3.135236 |
| 6 | -0.825689 | 3.199302  | -0.339775 |
| 6 | -1.892886 | 2.693295  | 1.764674  |
| 6 | -5.972160 | 0.807329  | -1.709074 |
| 6 | -6.101451 | 0.933042  | 0.782923  |
| 6 | 1.634439  | -3.650406 | 2.649934  |
| 6 | -0.373346 | -3.302310 | 3.967049  |
| 1 | -2.163365 | -2.914443 | 2.812704  |
| 6 | 2.599627  | -3.200377 | -0.491308 |
| 6 | 1.603583  | -2.410208 | -2.564324 |
| 1 | -0.566380 | -2.369960 | -2.572151 |
| 1 | -5.074397 | -4.111505 | 1.284871  |
| 1 | -4.147219 | -5.619402 | 1.076446  |
| 1 | -3.462860 | -4.282936 | 2.024657  |
| 1 | -5.305131 | -4.177484 | -1.252272 |
| 1 | -4.190167 | -5.552279 | -1.427680 |
| 1 | -3.859591 | -4.020426 | -2.283169 |
| 6 | -0.296292 | 3.254535  | -2.896058 |
| 6 | -1.824331 | 1.987443  | -4.299595 |
| 1 | -3.351353 | 0.897648  | -3.217865 |
| 6 | 0.156060  | 3.913247  | 0.328981  |

|   |           |           |           |
|---|-----------|-----------|-----------|
| 6 | -0.907922 | 3.417914  | 2.460452  |
| 1 | -2.700643 | 2.205366  | 2.316624  |
| 1 | -6.530704 | -0.140738 | -1.727528 |
| 1 | -6.697956 | 1.631668  | -1.781620 |
| 1 | -5.331328 | 0.841536  | -2.600777 |
| 1 | -6.711630 | 0.017168  | 0.804262  |
| 1 | -6.783720 | 1.795893  | 0.735441  |
| 1 | -5.536475 | 0.988337  | 1.725354  |
| 6 | 1.002335  | -3.604768 | 3.905567  |
| 1 | 2.714377  | -3.806522 | 2.596735  |
| 6 | -1.131079 | -3.103657 | 5.283865  |
| 6 | 2.748965  | -2.757351 | -1.818233 |
| 1 | 3.486605  | -3.415912 | 0.109883  |
| 6 | 1.658203  | -1.706879 | -3.923935 |
| 6 | -0.689137 | 2.817809  | -4.173971 |
| 1 | 0.576489  | 3.901693  | -2.790848 |
| 6 | -2.370764 | 1.499335  | -5.648373 |
| 6 | 0.137589  | 4.027524  | 1.729456  |
| 1 | 0.965264  | 4.373779  | -0.240406 |
| 6 | -1.044445 | 3.574144  | 3.979570  |
| 6 | 1.853673  | -3.858744 | 5.154399  |
| 6 | -0.152922 | -3.041501 | 6.467217  |
| 6 | -1.906500 | -1.776766 | 5.253092  |
| 6 | -2.123987 | -4.260998 | 5.480975  |

|   |           |           |           |
|---|-----------|-----------|-----------|
| 6 | 4.163061  | -2.613888 | -2.386173 |
| 6 | 1.017990  | -2.597251 | -5.000477 |
| 6 | 3.106566  | -1.371505 | -4.322470 |
| 6 | 0.883002  | -0.381872 | -3.828318 |
| 6 | 0.110334  | 3.307232  | -5.386553 |
| 6 | -1.713680 | 2.263694  | -6.808640 |
| 6 | -2.112083 | -0.008694 | -5.806758 |
| 6 | -3.886771 | 1.741751  | -5.728553 |
| 6 | 1.314610  | 4.746612  | 2.399426  |
| 6 | 0.314694  | 3.941851  | 4.591116  |
| 6 | -2.079991 | 4.679317  | 4.255594  |
| 6 | -1.517409 | 2.284066  | 4.662859  |
| 6 | 0.942211  | -4.088209 | 6.368968  |
| 6 | 2.719578  | -5.114169 | 4.972012  |
| 6 | 2.778126  | -2.656097 | 5.401972  |
| 1 | -0.722144 | -3.155936 | 7.403596  |
| 1 | 0.301588  | -2.037968 | 6.501740  |
| 1 | -1.229749 | -0.943431 | 5.010753  |
| 1 | -2.353823 | -1.584896 | 6.240982  |
| 1 | -2.722702 | -1.784698 | 4.516128  |
| 1 | -2.823267 | -4.324833 | 4.633992  |
| 1 | -2.712371 | -4.108336 | 6.399198  |
| 1 | -1.605987 | -5.227919 | 5.555995  |
| 6 | 4.089205  | -2.453001 | -3.911742 |

|   |           |           |           |
|---|-----------|-----------|-----------|
| 6 | 4.842958  | -1.393124 | -1.743077 |
| 6 | 5.003267  | -3.863365 | -2.085650 |
| 1 | -0.014857 | -2.865202 | -4.734008 |
| 1 | 0.992959  | -2.067396 | -5.965751 |
| 1 | 1.582804  | -3.532005 | -5.133440 |
| 1 | 3.399756  | -0.418158 | -3.854775 |
| 1 | 3.144089  | -1.201036 | -5.410182 |
| 1 | 1.289384  | 0.256474  | -3.027708 |
| 1 | 0.965575  | 0.166348  | -4.780856 |
| 1 | -0.187538 | -0.524847 | -3.620014 |
| 6 | -0.218823 | 2.445467  | -6.614536 |
| 6 | 1.623529  | 3.217193  | -5.138132 |
| 6 | -0.249773 | 4.779251  | -5.654887 |
| 1 | -2.193517 | 3.250913  | -6.907244 |
| 1 | -1.921466 | 1.726103  | -7.747685 |
| 1 | -2.515918 | -0.568970 | -4.949359 |
| 1 | -2.600892 | -0.381415 | -6.720372 |
| 1 | -1.038856 | -0.232630 | -5.873252 |
| 1 | -4.128575 | 2.790966  | -5.503079 |
| 1 | -4.243648 | 1.514677  | -6.745164 |
| 1 | -4.447942 | 1.102599  | -5.032090 |
| 6 | 0.989516  | 5.088245  | 3.861102  |
| 6 | 1.659222  | 6.059225  | 1.681196  |
| 6 | 2.534281  | 3.809769  | 2.338525  |

|   |           |           |           |
|---|-----------|-----------|-----------|
| 1 | 0.171168  | 4.190476  | 5.655038  |
| 1 | 0.961726  | 3.048485  | 4.559951  |
| 1 | -3.060343 | 4.391144  | 3.847746  |
| 1 | -2.191001 | 4.840610  | 5.339679  |
| 1 | -1.797113 | 5.631668  | 3.786018  |
| 1 | -0.830986 | 1.454457  | 4.443468  |
| 1 | -1.534693 | 2.436893  | 5.753114  |
| 1 | -2.533327 | 1.990263  | 4.362338  |
| 1 | 1.560002  | -4.092730 | 7.281296  |
| 1 | 0.490396  | -5.091653 | 6.292049  |
| 1 | 2.103401  | -5.980001 | 4.687811  |
| 1 | 3.231360  | -5.349385 | 5.918130  |
| 1 | 3.493768  | -4.976059 | 4.204198  |
| 1 | 3.427510  | -2.471286 | 4.531738  |
| 1 | 3.419669  | -2.841445 | 6.278677  |
| 1 | 2.205904  | -1.734187 | 5.575174  |
| 1 | 5.097057  | -2.230750 | -4.297684 |
| 1 | 3.787099  | -3.418097 | -4.353625 |
| 1 | 4.922824  | -1.529290 | -0.654422 |
| 1 | 5.858273  | -1.255752 | -2.147842 |
| 1 | 4.269722  | -0.470276 | -1.908224 |
| 1 | 4.499515  | -4.771282 | -2.448502 |
| 1 | 5.978121  | -3.783585 | -2.590984 |
| 1 | 5.198575  | -3.986443 | -1.011074 |

|   |           |           |           |
|---|-----------|-----------|-----------|
| 1 | 0.234303  | 2.908602  | -7.505724 |
| 1 | 0.263021  | 1.459621  | -6.497869 |
| 1 | 1.914365  | 2.205749  | -4.819668 |
| 1 | 2.162638  | 3.455646  | -6.067944 |
| 1 | 1.963374  | 3.928124  | -4.372399 |
| 1 | 0.002557  | 5.399615  | -4.782366 |
| 1 | 0.311870  | 5.160085  | -6.522542 |
| 1 | -1.323604 | 4.908520  | -5.849061 |
| 1 | 1.923524  | 5.375167  | 4.370504  |
| 1 | 0.338663  | 5.977539  | 3.888086  |
| 1 | 0.772876  | 6.705099  | 1.593853  |
| 1 | 2.425233  | 6.601450  | 2.256864  |
| 1 | 2.065388  | 5.893218  | 0.673975  |
| 1 | 2.783551  | 3.565264  | 1.295401  |
| 1 | 3.411904  | 4.288075  | 2.801974  |
| 1 | 2.339346  | 2.858689  | 2.853376  |
| 1 | -1.076600 | -0.064402 | 2.482239  |
| 6 | 2.546724  | -0.076880 | 3.073234  |
| 6 | 3.198430  | 0.543834  | 4.146765  |
| 6 | 3.315431  | -0.829246 | 2.164655  |
| 6 | 4.571816  | 0.392889  | 4.326896  |
| 1 | 2.614697  | 1.128471  | 4.860260  |
| 6 | 4.680492  | -0.975852 | 2.360758  |
| 1 | 2.818225  | -1.299251 | 1.313816  |

|   |          |           |          |
|---|----------|-----------|----------|
| 6 | 5.340866 | -0.380184 | 3.448973 |
| 1 | 5.038316 | 0.881986  | 5.181195 |
| 1 | 5.249585 | -1.579207 | 1.649553 |
| 6 | 6.842137 | -0.610433 | 3.635328 |
| 6 | 7.388464 | 0.132216  | 4.857463 |
| 1 | 8.467927 | -0.055656 | 4.951331 |
| 1 | 7.242185 | 1.218803  | 4.768081 |
| 1 | 6.906253 | -0.208024 | 5.785707 |
| 6 | 7.093251 | -2.115949 | 3.826540 |
| 1 | 6.760882 | -2.694660 | 2.952571 |
| 1 | 8.167459 | -2.308297 | 3.971269 |
| 1 | 6.551188 | -2.491083 | 4.707673 |
| 6 | 7.593422 | -0.116782 | 2.387873 |
| 1 | 7.421403 | 0.958197  | 2.230595 |
| 1 | 8.675297 | -0.281387 | 2.506758 |
| 1 | 7.269293 | -0.647364 | 1.481100 |

---

**Table S14**

**[As-TS]<sup>3</sup>**

E : -5494.85780557 Hartree

G : -5493.318336 Hartree

---

Atomic

Coordinates (Angstroms)

| Number | X         | Y         | Z         |
|--------|-----------|-----------|-----------|
| 33     | 0.000000  | 0.000000  | 0.000000  |
| 6      | 0.000000  | 0.000000  | 2.396902  |
| 6      | 1.125727  | 0.000000  | 2.934018  |
| 6      | -1.848397 | -0.661011 | -0.057237 |
| 6      | -2.150029 | -2.031056 | 0.062364  |
| 6      | -2.945820 | 0.207792  | -0.226870 |
| 6      | -1.176384 | -3.187764 | 0.246352  |
| 6      | -3.467549 | -2.505237 | 0.008275  |
| 6      | -2.909583 | 1.698744  | -0.557604 |
| 6      | -4.264002 | -0.259874 | -0.221554 |
| 6      | -2.056050 | -4.424540 | -0.119905 |
| 6      | -0.567006 | -3.273486 | 1.645428  |
| 6      | 0.079153  | -3.127092 | -0.605741 |
| 6      | -3.543886 | -4.023258 | 0.045014  |
| 6      | -4.538099 | -1.622153 | -0.107033 |
| 6      | -4.400786 | 2.129923  | -0.420534 |
| 6      | -2.316409 | 1.922459  | -1.948008 |
| 6      | -1.969328 | 2.533560  | 0.296942  |
| 6      | -5.285984 | 0.853841  | -0.368181 |
| 1      | -1.782756 | -5.306687 | 0.476577  |
| 1      | -1.867390 | -4.668339 | -1.176158 |
| 6      | 0.819803  | -3.494286 | 1.570050  |

|   |           |           |           |
|---|-----------|-----------|-----------|
| 6 | -1.162769 | -3.115573 | 2.881394  |
| 6 | 1.227655  | -3.374604 | 0.161331  |
| 6 | 0.192740  | -2.762408 | -1.932215 |
| 6 | -4.143383 | -4.534512 | 1.362004  |
| 6 | -4.383792 | -4.556228 | -1.121565 |
| 1 | -5.568190 | -1.990169 | -0.130788 |
| 1 | -4.691177 | 2.802062  | -1.240448 |
| 1 | -4.515137 | 2.696965  | 0.514638  |
| 6 | -1.212677 | 2.788096  | -1.892850 |
| 6 | -2.712632 | 1.392105  | -3.161104 |
| 6 | -0.985472 | 3.154406  | -0.485903 |
| 6 | -1.967516 | 2.694680  | 1.671010  |
| 6 | -6.131703 | 0.683316  | -1.636417 |
| 6 | -6.215681 | 0.885885  | 0.852045  |
| 6 | 1.560975  | -3.655979 | 2.730862  |
| 6 | -0.416824 | -3.232144 | 4.070528  |
| 1 | -2.220771 | -2.850085 | 2.936013  |
| 6 | 2.478253  | -3.308082 | -0.436909 |
| 6 | 1.457376  | -2.582185 | -2.521869 |
| 1 | -0.712054 | -2.515630 | -2.495424 |
| 1 | -5.150241 | -4.118056 | 1.517944  |
| 1 | -4.226322 | -5.631955 | 1.340274  |
| 1 | -3.520682 | -4.262463 | 2.223475  |
| 1 | -5.442679 | -4.277653 | -1.008473 |

|   |           |           |           |
|---|-----------|-----------|-----------|
| 1 | -4.327853 | -5.655004 | -1.162449 |
| 1 | -4.023493 | -4.153720 | -2.079739 |
| 6 | -0.527541 | 3.108426  | -3.056490 |
| 6 | -2.063170 | 1.746220  | -4.359267 |
| 1 | -3.544599 | 0.685264  | -3.189431 |
| 6 | 0.028658  | 3.873333  | 0.128374  |
| 6 | -0.950743 | 3.425088  | 2.310722  |
| 1 | -2.752114 | 2.218181  | 2.264111  |
| 1 | -6.680007 | -0.270707 | -1.617448 |
| 1 | -6.867843 | 1.497680  | -1.717147 |
| 1 | -5.509140 | 0.700205  | -2.541292 |
| 1 | -6.821725 | -0.031037 | 0.911642  |
| 1 | -6.902244 | 1.744504  | 0.791317  |
| 1 | -5.633935 | 0.971116  | 1.781936  |
| 6 | 0.952140  | -3.561208 | 3.995107  |
| 1 | 2.636951  | -3.832721 | 2.663943  |
| 6 | -1.147657 | -2.976892 | 5.392948  |
| 6 | 2.610994  | -2.911530 | -1.780192 |
| 1 | 3.372275  | -3.512068 | 0.157539  |
| 6 | 1.496343  | -1.943854 | -3.914295 |
| 6 | -0.940238 | 2.600619  | -4.301563 |
| 1 | 0.338076  | 3.771410  | -3.003569 |
| 6 | -2.627950 | 1.178074  | -5.668546 |
| 6 | 0.075632  | 4.002289  | 1.526283  |

|   |           |           |           |
|---|-----------|-----------|-----------|
| 1 | 0.821237  | 4.309957  | -0.481870 |
| 6 | -1.022975 | 3.628811  | 3.828003  |
| 6 | 1.819280  | -3.794053 | 5.237252  |
| 6 | -0.150438 | -2.907997 | 6.560080  |
| 6 | -1.887055 | -1.630544 | 5.335759  |
| 6 | -2.167363 | -4.101263 | 5.638099  |
| 6 | 4.017105  | -2.792639 | -2.372425 |
| 6 | 0.822806  | -2.876877 | -4.933118 |
| 6 | 2.940793  | -1.650101 | -4.359067 |
| 6 | 0.742560  | -0.603619 | -3.870185 |
| 6 | -0.174224 | 3.037965  | -5.554856 |
| 6 | -2.009507 | 1.892268  | -6.880713 |
| 6 | -2.342652 | -0.331032 | -5.753198 |
| 6 | -4.149647 | 1.388199  | -5.728343 |
| 6 | 1.312700  | 4.673585  | 2.135427  |
| 6 | 0.381464  | 3.915876  | 4.376479  |
| 6 | -1.969298 | 4.811799  | 4.103222  |
| 6 | -1.561000 | 2.398065  | 4.568736  |
| 6 | 0.921908  | -3.978609 | 6.469820  |
| 6 | 2.664118  | -5.066571 | 5.075841  |
| 6 | 2.764905  | -2.599309 | 5.440427  |
| 1 | -0.707686 | -2.989502 | 7.507028  |
| 1 | 0.324902  | -1.913664 | 6.565224  |
| 1 | -1.189023 | -0.823090 | 5.067577  |

|   |           |           |           |
|---|-----------|-----------|-----------|
| 1 | -2.319651 | -1.401870 | 6.322398  |
| 1 | -2.709701 | -1.633668 | 4.605852  |
| 1 | -2.881534 | -4.171486 | 4.804180  |
| 1 | -2.737048 | -3.906493 | 6.560097  |
| 1 | -1.673178 | -5.078800 | 5.734115  |
| 6 | 3.921533  | -2.715037 | -3.903265 |
| 6 | 4.694921  | -1.534278 | -1.803301 |
| 6 | 4.871043  | -4.018037 | -2.017102 |
| 1 | -0.207914 | -3.117593 | -4.634486 |
| 1 | 0.785918  | -2.394935 | -5.922748 |
| 1 | 1.373532  | -3.824427 | -5.029984 |
| 1 | 3.253487  | -0.673661 | -3.956587 |
| 1 | 2.958852  | -1.546079 | -5.455573 |
| 1 | 1.182854  | 0.069492  | -3.117497 |
| 1 | 0.807288  | -0.108405 | -4.852807 |
| 1 | -0.323781 | -0.717508 | -3.625012 |
| 6 | -0.514288 | 2.107795  | -6.728719 |
| 6 | 1.344884  | 2.983227  | -5.334188 |
| 6 | -0.563295 | 4.488226  | -5.892152 |
| 1 | -2.508574 | 2.865110  | -7.018798 |
| 1 | -2.227742 | 1.303622  | -7.786163 |
| 1 | -2.716728 | -0.852809 | -4.858749 |
| 1 | -2.842832 | -0.761051 | -6.634929 |
| 1 | -1.266637 | -0.536841 | -5.831785 |

|   |           |           |           |
|---|-----------|-----------|-----------|
| 1 | -4.407043 | 2.443186  | -5.552506 |
| 1 | -4.522999 | 1.101762  | -6.723813 |
| 1 | -4.683827 | 0.776194  | -4.987678 |
| 6 | 1.085807  | 5.023467  | 3.614346  |
| 6 | 1.677929  | 5.970375  | 1.399732  |
| 6 | 2.482116  | 3.679364  | 2.010788  |
| 1 | 0.302103  | 4.172780  | 5.445210  |
| 1 | 0.970902  | 2.984656  | 4.315687  |
| 1 | -2.983300 | 4.574437  | 3.748349  |
| 1 | -2.020972 | 5.020168  | 5.183837  |
| 1 | -1.646803 | 5.725023  | 3.584293  |
| 1 | -0.945687 | 1.513977  | 4.352410  |
| 1 | -1.523207 | 2.584115  | 5.653158  |
| 1 | -2.607197 | 2.173299  | 4.317131  |
| 1 | 1.552954  | -3.975257 | 7.373018  |
| 1 | 0.449338  | -4.974324 | 6.421543  |
| 1 | 2.031330  | -5.930473 | 4.824084  |
| 1 | 3.186646  | -5.284027 | 6.020316  |
| 1 | 3.428756  | -4.960447 | 4.293529  |
| 1 | 3.410821  | -2.452674 | 4.560436  |
| 1 | 3.409911  | -2.768352 | 6.317826  |
| 1 | 2.209550  | -1.662775 | 5.588438  |
| 1 | 4.924738  | -2.521008 | -4.315666 |
| 1 | 3.606884  | -3.701090 | -4.286379 |

|   |           |           |           |
|---|-----------|-----------|-----------|
| 1 | 4.791210  | -1.613212 | -0.710231 |
| 1 | 5.702878  | -1.408675 | -2.229873 |
| 1 | 4.110229  | -0.626308 | -2.006689 |
| 1 | 4.368483  | -4.948256 | -2.320254 |
| 1 | 5.836651  | -3.959831 | -2.542590 |
| 1 | 5.086225  | -4.079843 | -0.941067 |
| 1 | -0.087398 | 2.530299  | -7.652411 |
| 1 | -0.013929 | 1.137128  | -6.570418 |
| 1 | 1.657438  | 1.993965  | -4.969908 |
| 1 | 1.861228  | 3.180439  | -6.286301 |
| 1 | 1.689239  | 3.737986  | -4.613749 |
| 1 | -0.303389 | 5.157597  | -5.058966 |
| 1 | -0.025480 | 4.831014  | -6.790222 |
| 1 | -1.642710 | 4.591086  | -6.070442 |
| 1 | 2.061546  | 5.248877  | 4.074000  |
| 1 | 0.494246  | 5.950991  | 3.681206  |
| 1 | 0.818793  | 6.656587  | 1.360773  |
| 1 | 2.498027  | 6.475547  | 1.933003  |
| 1 | 2.020931  | 5.788620  | 0.371933  |
| 1 | 2.666606  | 3.427641  | 0.955894  |
| 1 | 3.403941  | 4.112222  | 2.431036  |
| 1 | 2.266288  | 2.736762  | 2.533636  |
| 1 | -1.072177 | -0.081010 | 2.542854  |
| 6 | 2.544855  | -0.083283 | 3.069975  |

|   |          |           |          |
|---|----------|-----------|----------|
| 6 | 3.245716 | 0.577122  | 4.088365 |
| 6 | 3.271717 | -0.884557 | 2.167343 |
| 6 | 4.623306 | 0.417757  | 4.221473 |
| 1 | 2.696900 | 1.200191  | 4.796982 |
| 6 | 4.641922 | -1.037895 | 2.316048 |
| 1 | 2.738365 | -1.387604 | 1.358600 |
| 6 | 5.350366 | -0.402506 | 3.350102 |
| 1 | 5.127990 | 0.938832  | 5.034183 |
| 1 | 5.176248 | -1.678689 | 1.610396 |
| 6 | 6.855549 | -0.640876 | 3.488088 |
| 6 | 7.455869 | 0.147526  | 4.654970 |
| 1 | 8.536360 | -0.048024 | 4.715586 |
| 1 | 7.316288 | 1.230797  | 4.524191 |
| 1 | 7.006499 | -0.147113 | 5.614753 |
| 6 | 7.100666 | -2.139397 | 3.734121 |
| 1 | 6.729435 | -2.751286 | 2.899266 |
| 1 | 8.177927 | -2.336783 | 3.845640 |
| 1 | 6.589826 | -2.470866 | 4.650687 |
| 6 | 7.561808 | -0.209232 | 2.192259 |
| 1 | 7.394435 | 0.860062  | 1.996037 |
| 1 | 8.645862 | -0.381369 | 2.275410 |
| 1 | 7.196323 | -0.773886 | 1.322508 |

**Table S15****[Sb-TS]<sup>3</sup>**

E : -3499.42298532 Hartree

G : -3497.885789 Hartree

---

| Atomic | Coordinates (Angstroms) |           |           |
|--------|-------------------------|-----------|-----------|
| Number | X                       | Y         | Z         |
| 51     | 0.000000                | 0.000000  | 0.000000  |
| 6      | 0.000000                | 0.000000  | 2.478751  |
| 6      | 1.121452                | 0.000000  | 3.046891  |
| 6      | -2.058178               | -0.771780 | 0.037330  |
| 6      | -2.325385               | -2.141318 | 0.212378  |
| 6      | -3.179939               | 0.067301  | -0.109397 |
| 6      | -1.327253               | -3.278055 | 0.412043  |
| 6      | -3.635083               | -2.645437 | 0.230988  |
| 6      | -3.198585               | 1.553780  | -0.473145 |
| 6      | -4.488293               | -0.427051 | -0.038962 |
| 6      | -2.196070               | -4.542617 | 0.122053  |
| 6      | -0.682598               | -3.302541 | 1.798058  |
| 6      | -0.093912               | -3.254439 | -0.473306 |
| 6      | -3.682633               | -4.161457 | 0.329441  |
| 6      | -4.727525               | -1.789695 | 0.128856  |
| 6      | -4.694273               | 1.950912  | -0.288045 |

---

|   |           |           |           |
|---|-----------|-----------|-----------|
| 6 | -2.662941 | 1.766499  | -1.887316 |
| 6 | -2.257773 | 2.437382  | 0.329087  |
| 6 | -5.543475 | 0.655192  | -0.182818 |
| 1 | -1.882962 | -5.398752 | 0.736713  |
| 1 | -2.042826 | -4.818749 | -0.932008 |
| 6 | 0.700252  | -3.537158 | 1.697872  |
| 6 | -1.244962 | -3.088047 | 3.041519  |
| 6 | 1.072584  | -3.476850 | 0.275445  |
| 6 | -0.010827 | -2.958995 | -1.819827 |
| 6 | -4.220956 | -4.631355 | 1.687758  |
| 6 | -4.556567 | -4.754838 | -0.781737 |
| 1 | -5.749490 | -2.179627 | 0.158182  |
| 1 | -5.031800 | 2.603518  | -1.105769 |
| 1 | -4.788010 | 2.528691  | 0.642821  |
| 6 | -1.594997 | 2.678387  | -1.891627 |
| 6 | -3.069891 | 1.180738  | -3.070948 |
| 6 | -1.334753 | 3.087652  | -0.501841 |
| 6 | -2.201976 | 2.612795  | 1.701108  |
| 6 | -6.415234 | 0.432597  | -1.425348 |
| 6 | -6.443938 | 0.693182  | 1.058784  |
| 6 | 1.469033  | -3.663118 | 2.845434  |
| 6 | -0.470373 | -3.166861 | 4.215420  |
| 1 | -2.298969 | -2.810018 | 3.111036  |
| 6 | 2.308153  | -3.443216 | -0.354873 |

|   |           |           |           |
|---|-----------|-----------|-----------|
| 6 | 1.240089  | -2.820871 | -2.450608 |
| 1 | -0.928624 | -2.739017 | -2.373106 |
| 1 | -5.227936 | -4.225073 | 1.867967  |
| 1 | -4.285790 | -5.730040 | 1.710345  |
| 1 | -3.569498 | -4.317077 | 2.512832  |
| 1 | -5.615465 | -4.491045 | -0.637705 |
| 1 | -4.481010 | -5.853249 | -0.782490 |
| 1 | -4.241628 | -4.383726 | -1.768171 |
| 6 | -0.947776 | 2.977792  | -3.082134 |
| 6 | -2.464148 | 1.516083  | -4.297012 |
| 1 | -3.873685 | 0.441646  | -3.052732 |
| 6 | -0.318295 | 3.846277  | 0.061486  |
| 6 | -1.184067 | 3.382783  | 2.288976  |
| 1 | -2.941584 | 2.113440  | 2.331727  |
| 1 | -6.934011 | -0.536528 | -1.372350 |
| 1 | -7.177043 | 1.223259  | -1.504417 |
| 1 | -5.816152 | 0.448142  | -2.345978 |
| 1 | -7.027197 | -0.235530 | 1.152961  |
| 1 | -7.151713 | 1.534309  | 0.996323  |
| 1 | -5.842406 | 0.812094  | 1.972230  |
| 6 | 0.892837  | -3.515104 | 4.119646  |
| 1 | 2.541001  | -3.855306 | 2.759091  |
| 6 | -1.165479 | -2.851828 | 5.544414  |
| 6 | 2.410029  | -3.114802 | -1.719192 |

|   |           |           |           |
|---|-----------|-----------|-----------|
| 1 | 3.215305  | -3.622760 | 0.227095  |
| 6 | 1.248839  | -2.279384 | -3.884858 |
| 6 | -1.367510 | 2.405707  | -4.296821 |
| 1 | -0.103057 | 3.669434  | -3.074596 |
| 6 | -3.050636 | 0.896861  | -5.572923 |
| 6 | -0.208308 | 3.980508  | 1.454840  |
| 1 | 0.433866  | 4.299490  | -0.586589 |
| 6 | -1.202087 | 3.610841  | 3.804526  |
| 6 | 1.785503  | -3.716413 | 5.349453  |
| 6 | -0.141367 | -2.762958 | 6.686675  |
| 6 | -1.878086 | -1.493015 | 5.456420  |
| 6 | -2.200975 | -3.946246 | 5.850956  |
| 6 | 3.802920  | -3.029193 | -2.347078 |
| 6 | 0.551910  | -3.282806 | -4.817887 |
| 6 | 2.682980  | -2.021172 | -4.382120 |
| 6 | 0.497386  | -0.937476 | -3.926911 |
| 6 | -0.627700 | 2.802683  | -5.578806 |
| 6 | -2.480306 | 1.591282  | -6.819376 |
| 6 | -2.736707 | -0.607795 | -5.625061 |
| 6 | -4.577519 | 1.074937  | -5.594512 |
| 6 | 1.050056  | 4.659473  | 2.009317  |
| 6 | 0.215849  | 3.930450  | 4.297821  |
| 6 | -2.155935 | 4.785453  | 4.091090  |
| 6 | -1.695046 | 2.387210  | 4.586111  |

|   |           |           |           |
|---|-----------|-----------|-----------|
| 6 | 0.912393  | -3.852340 | 6.605495  |
| 6 | 2.612540  | -5.003316 | 5.211440  |
| 6 | 2.748717  | -2.526964 | 5.495593  |
| 1 | -0.678293 | -2.806453 | 7.647740  |
| 1 | 0.349417  | -1.776860 | 6.650258  |
| 1 | -1.165246 | -0.709516 | 5.158227  |
| 1 | -2.293801 | -1.226378 | 6.440849  |
| 1 | -2.708850 | -1.499384 | 4.735577  |
| 1 | -2.935950 | -4.030944 | 5.036718  |
| 1 | -2.745052 | -3.708358 | 6.778243  |
| 1 | -1.723444 | -4.929564 | 5.970090  |
| 6 | 3.674823  | -3.052972 | -3.877216 |
| 6 | 4.483427  | -1.732855 | -1.874075 |
| 6 | 4.673199  | -4.223810 | -1.931435 |
| 1 | -0.470820 | -3.500622 | -4.477277 |
| 1 | 0.490568  | -2.873426 | -5.838348 |
| 1 | 1.101046  | -4.235261 | -4.858717 |
| 1 | 3.005809  | -1.019747 | -4.056490 |
| 1 | 2.675119  | -1.993911 | -5.483292 |
| 1 | 0.959298  | -0.208008 | -3.242834 |
| 1 | 0.539898  | -0.522209 | -4.947449 |
| 1 | -0.562275 | -1.029619 | -3.645974 |
| 6 | -0.985040 | 1.831682  | -6.713832 |
| 6 | 0.894564  | 2.751064  | -5.379723 |

|   |           |           |           |
|---|-----------|-----------|-----------|
| 6 | -1.022413 | 4.239875  | -5.960355 |
| 1 | -2.998290 | 2.553365  | -6.964177 |
| 1 | -2.715286 | 0.978399  | -7.704280 |
| 1 | -3.073892 | -1.112275 | -4.706450 |
| 1 | -3.253205 | -1.071763 | -6.479714 |
| 1 | -1.659398 | -0.793777 | -5.730296 |
| 1 | -4.851549 | 2.129357  | -5.442244 |
| 1 | -4.973374 | 0.751411  | -6.569727 |
| 1 | -5.076992 | 0.475130  | -4.820399 |
| 6 | 0.876120  | 5.032380  | 3.489047  |
| 6 | 1.397554  | 5.941948  | 1.241557  |
| 6 | 2.208241  | 3.654220  | 1.860019  |
| 1 | 0.167761  | 4.210604  | 5.362565  |
| 1 | 0.817695  | 3.007047  | 4.239395  |
| 1 | -3.178175 | 4.527066  | 3.776893  |
| 1 | -2.172278 | 5.013162  | 5.168897  |
| 1 | -1.865267 | 5.693252  | 3.544532  |
| 1 | -1.076280 | 1.508012  | 4.361227  |
| 1 | -1.617085 | 2.592073  | 5.664938  |
| 1 | -2.747136 | 2.145046  | 4.379395  |
| 1 | 1.562696  | -3.832879 | 7.494687  |
| 1 | 0.424278  | -4.841726 | 6.595493  |
| 1 | 1.964504  | -5.867703 | 5.003980  |
| 1 | 3.154894  | -5.194974 | 6.150293  |

|   |           |           |           |
|---|-----------|-----------|-----------|
| 1 | 3.359622  | -4.932669 | 4.408508  |
| 1 | 3.388670  | -2.425658 | 4.605061  |
| 1 | 3.399490  | -2.670220 | 6.373190  |
| 1 | 2.207736  | -1.577229 | 5.609964  |
| 1 | 4.668463  | -2.885249 | -4.322932 |
| 1 | 3.355048  | -4.062715 | -4.187390 |
| 1 | 4.598006  | -1.738651 | -0.779731 |
| 1 | 5.483251  | -1.631306 | -2.325539 |
| 1 | 3.890506  | -0.842892 | -2.127230 |
| 1 | 4.169085  | -5.175047 | -2.156810 |
| 1 | 5.624089  | -4.197090 | -2.485393 |
| 1 | 4.918043  | -4.210721 | -0.860080 |
| 1 | -0.586543 | 2.229254  | -7.660924 |
| 1 | -0.468459 | 0.873096  | -6.536101 |
| 1 | 1.207706  | 1.770218  | -4.993367 |
| 1 | 1.397569  | 2.919934  | -6.344419 |
| 1 | 1.251595  | 3.523455  | -4.684561 |
| 1 | -0.754601 | 4.938582  | -5.154207 |
| 1 | -0.495321 | 4.552241  | -6.875613 |
| 1 | -2.103924 | 4.334709  | -6.130617 |
| 1 | 1.866439  | 5.276308  | 3.906145  |
| 1 | 0.276937  | 5.954563  | 3.562320  |
| 1 | 0.541917  | 6.633311  | 1.220930  |
| 1 | 2.238355  | 6.449797  | 1.738634  |

|   |           |           |          |
|---|-----------|-----------|----------|
| 1 | 1.704955  | 5.742286  | 0.205858 |
| 1 | 2.363941  | 3.398810  | 0.801057 |
| 1 | 3.144404  | 4.079974  | 2.255313 |
| 1 | 1.996767  | 2.714785  | 2.391540 |
| 1 | -1.062118 | -0.110059 | 2.687028 |
| 6 | 2.546240  | -0.070786 | 3.095231 |
| 6 | 3.308864  | 0.658179  | 4.019681 |
| 6 | 3.221420  | -0.929224 | 2.202777 |
| 6 | 4.692843  | 0.511823  | 4.072568 |
| 1 | 2.802451  | 1.326505  | 4.718691 |
| 6 | 4.599751  | -1.066718 | 2.270314 |
| 1 | 2.643250  | -1.491215 | 1.467011 |
| 6 | 5.369223  | -0.361748 | 3.211245 |
| 1 | 5.245404  | 1.087755  | 4.814079 |
| 1 | 5.091414  | -1.751483 | 1.574819 |
| 6 | 6.882405  | -0.583172 | 3.264363 |
| 6 | 7.550881  | 0.282250  | 4.335751 |
| 1 | 8.634708  | 0.095855  | 4.337698 |
| 1 | 7.393761  | 1.354080  | 4.144564 |
| 1 | 7.167825  | 0.048982  | 5.340120 |
| 6 | 7.158360  | -2.061209 | 3.588813 |
| 1 | 6.739375  | -2.727593 | 2.821020 |
| 1 | 8.242575  | -2.244718 | 3.641293 |
| 1 | 6.711925  | -2.336127 | 4.556239 |

|   |          |           |          |
|---|----------|-----------|----------|
| 6 | 7.497967 | -0.232344 | 1.899580 |
| 1 | 7.307515 | 0.821025  | 1.646552 |
| 1 | 8.586822 | -0.392681 | 1.921677 |
| 1 | 7.081789 | -0.854136 | 1.093867 |

---

**Table S16**

**[Bi-TS]<sup>3</sup>**

E : -3473.75910665 Hartree

G : -3472.221471 Hartree

---

| Atomic | Coordinates (Angstroms) |           |           |
|--------|-------------------------|-----------|-----------|
| Number | X                       | Y         | Z         |
| 83     | 0.010312                | 0.004584  | -0.033495 |
| 6      | 0.004589                | 0.045099  | 2.399506  |
| 6      | 1.116762                | 0.068751  | 3.014753  |
| 6      | -2.161895               | -0.775213 | 0.024147  |
| 6      | -2.442685               | -2.126631 | 0.280113  |
| 6      | -3.270521               | 0.067076  | -0.169196 |
| 6      | -1.456203               | -3.266248 | 0.522988  |
| 6      | -3.759070               | -2.613018 | 0.334660  |
| 6      | -3.272465               | 1.529383  | -0.623489 |
| 6      | -4.585748               | -0.403401 | -0.060255 |

|   |           |           |           |
|---|-----------|-----------|-----------|
| 6 | -2.346009 | -4.531455 | 0.305849  |
| 6 | -0.782850 | -3.243569 | 1.895649  |
| 6 | -0.240849 | -3.298541 | -0.386094 |
| 6 | -3.823855 | -4.120429 | 0.518103  |
| 6 | -4.841205 | -1.750306 | 0.190017  |
| 6 | -4.760786 | 1.958693  | -0.451634 |
| 6 | -2.749152 | 1.650418  | -2.053018 |
| 6 | -2.308389 | 2.441299  | 0.116074  |
| 6 | -5.626806 | 0.684084  | -0.257157 |
| 1 | -2.034599 | -5.362796 | 0.954542  |
| 1 | -2.214194 | -4.857843 | -0.736737 |
| 6 | 0.591658  | -3.516676 | 1.777599  |
| 6 | -1.312137 | -2.961972 | 3.140553  |
| 6 | 0.936581  | -3.517811 | 0.346715  |
| 6 | -0.179628 | -3.044594 | -1.741937 |
| 6 | -4.341536 | -4.505862 | 1.910642  |
| 6 | -4.725450 | -4.764863 | -0.541085 |
| 1 | -5.867876 | -2.124272 | 0.249083  |
| 1 | -5.096813 | 2.561203  | -1.307565 |
| 1 | -4.838818 | 2.597205  | 0.440206  |
| 6 | -1.668530 | 2.544692  | -2.121772 |
| 6 | -3.180976 | 1.008542  | -3.198425 |
| 6 | -1.383954 | 3.026366  | -0.760262 |
| 6 | -2.223342 | 2.680924  | 1.477179  |

|   |           |           |           |
|---|-----------|-----------|-----------|
| 6 | -6.518876 | 0.400200  | -1.472415 |
| 6 | -6.509414 | 0.811536  | 0.991393  |
| 6 | 1.382001  | -3.614756 | 2.913461  |
| 6 | -0.513433 | -3.006294 | 4.300145  |
| 1 | -2.357135 | -2.653171 | 3.219254  |
| 6 | 2.159503  | -3.526291 | -0.308857 |
| 6 | 1.060867  | -2.946949 | -2.400913 |
| 1 | -1.104710 | -2.824791 | -2.282795 |
| 1 | -5.340845 | -4.078563 | 2.084784  |
| 1 | -4.416775 | -5.600651 | 1.998170  |
| 1 | -3.672207 | -4.151457 | 2.704497  |
| 1 | -5.778520 | -4.481482 | -0.391755 |
| 1 | -4.661431 | -5.862428 | -0.481782 |
| 1 | -4.426407 | -4.452946 | -1.552633 |
| 6 | -1.035027 | 2.771760  | -3.335740 |
| 6 | -2.588767 | 1.269450  | -4.449163 |
| 1 | -3.995487 | 0.284301  | -3.129777 |
| 6 | -0.336687 | 3.782536  | -0.251773 |
| 6 | -1.173626 | 3.448673  | 2.008803  |
| 1 | -2.959436 | 2.226405  | 2.144107  |
| 1 | -7.057646 | -0.551544 | -1.349643 |
| 1 | -7.264474 | 1.200694  | -1.595265 |
| 1 | -5.931305 | 0.341047  | -2.398825 |
| 1 | -7.101021 | -0.102589 | 1.152344  |

|   |           |           |           |
|---|-----------|-----------|-----------|
| 1 | -7.208926 | 1.655231  | 0.884965  |
| 1 | -5.893624 | 0.981259  | 1.887106  |
| 6 | 0.838330  | -3.393072 | 4.190684  |
| 1 | 2.446332  | -3.838737 | 2.813590  |
| 6 | -1.171965 | -2.602397 | 5.624767  |
| 6 | 2.240065  | -3.241914 | -1.685010 |
| 1 | 3.075486  | -3.703007 | 0.260328  |
| 6 | 1.051410  | -2.445886 | -3.849263 |
| 6 | -1.481320 | 2.143389  | -4.512509 |
| 1 | -0.183019 | 3.453256  | -3.377053 |
| 6 | -3.201651 | 0.590052  | -5.681455 |
| 6 | -0.194259 | 3.974598  | 1.131576  |
| 1 | 0.418430  | 4.178543  | -0.933580 |
| 6 | -1.143818 | 3.746559  | 3.510605  |
| 6 | 1.747520  | -3.547526 | 5.413852  |
| 6 | -0.146531 | -2.562668 | 6.771629  |
| 6 | -1.773898 | -1.194278 | 5.491813  |
| 6 | -2.286519 | -3.604284 | 5.968588  |
| 6 | 3.623096  | -3.207947 | -2.340009 |
| 6 | 0.350298  | -3.477797 | -4.747203 |
| 6 | 2.480476  | -2.192647 | -4.359747 |
| 6 | 0.293367  | -1.109390 | -3.924797 |
| 6 | -0.761254 | 2.467518  | -5.826032 |
| 6 | -2.641391 | 1.207097  | -6.972541 |

|   |           |           |           |
|---|-----------|-----------|-----------|
| 6 | -2.908095 | -0.919419 | -5.655417 |
| 6 | -4.726342 | 0.787363  | -5.691557 |
| 6 | 1.105838  | 4.621233  | 1.628210  |
| 6 | 0.308893  | 3.963584  | 3.955178  |
| 6 | -1.988447 | 5.010809  | 3.756145  |
| 6 | -1.723665 | 2.608015  | 4.357587  |
| 6 | 0.879615  | -3.676518 | 6.673574  |
| 6 | 2.605925  | -4.815773 | 5.304300  |
| 6 | 2.681152  | -2.330139 | 5.522758  |
| 1 | -0.688410 | -2.614799 | 7.729399  |
| 1 | 0.370007  | -1.589833 | 6.763904  |
| 1 | -0.997018 | -0.480268 | 5.178053  |
| 1 | -2.175488 | -0.865979 | 6.463552  |
| 1 | -2.595191 | -1.156726 | 4.760495  |
| 1 | -3.022837 | -3.677348 | 5.154876  |
| 1 | -2.816450 | -3.286045 | 6.879627  |
| 1 | -1.877633 | -4.611204 | 6.138875  |
| 6 | 3.471227  | -3.232078 | -3.868353 |
| 6 | 4.360859  | -1.936771 | -1.885459 |
| 6 | 4.453813  | -4.433619 | -1.932848 |
| 1 | -0.671590 | -3.680683 | -4.394609 |
| 1 | 0.285593  | -3.102190 | -5.780498 |
| 1 | 0.895505  | -4.433074 | -4.758685 |
| 1 | 2.809937  | -1.194784 | -4.028803 |

|   |           |           |           |
|---|-----------|-----------|-----------|
| 1 | 2.462497  | -2.157160 | -5.460620 |
| 1 | 0.761426  | -0.356398 | -3.270435 |
| 1 | 0.324763  | -0.723609 | -4.956922 |
| 1 | -0.763946 | -1.194548 | -3.633693 |
| 6 | -1.142799 | 1.439613  | -6.901568 |
| 6 | 0.764280  | 2.421479  | -5.652287 |
| 6 | -1.157556 | 3.884555  | -6.275896 |
| 1 | -3.152842 | 2.164060  | -7.165817 |
| 1 | -2.893573 | 0.547145  | -7.817969 |
| 1 | -3.237735 | -1.368212 | -4.705700 |
| 1 | -3.443853 | -1.422268 | -6.475470 |
| 1 | -1.835125 | -1.126280 | -5.766360 |
| 1 | -4.984595 | 1.852213  | -5.594103 |
| 1 | -5.140548 | 0.415989  | -6.641767 |
| 1 | -5.222070 | 0.238107  | -4.878539 |
| 6 | 1.018098  | 5.009088  | 3.112929  |
| 6 | 1.456304  | 5.885582  | 0.832301  |
| 6 | 2.224886  | 3.578301  | 1.440223  |
| 1 | 0.318497  | 4.256093  | 5.017685  |
| 1 | 0.835881  | 2.995937  | 3.885257  |
| 1 | -3.039959 | 4.816544  | 3.497279  |
| 1 | -1.941524 | 5.304945  | 4.816952  |
| 1 | -1.651786 | 5.856893  | 3.141447  |
| 1 | -1.201936 | 1.663574  | 4.151646  |

|   |           |           |           |
|---|-----------|-----------|-----------|
| 1 | -1.590033 | 2.846035  | 5.423950  |
| 1 | -2.800618 | 2.463519  | 4.192001  |
| 1 | 1.534017  | -3.682056 | 7.560001  |
| 1 | 0.367709  | -4.654093 | 6.652360  |
| 1 | 1.979322  | -5.702699 | 5.128226  |
| 1 | 3.161247  | -4.965735 | 6.243041  |
| 1 | 3.345348  | -4.749408 | 4.494139  |
| 1 | 3.354072  | -2.275646 | 4.652575  |
| 1 | 3.298905  | -2.402425 | 6.432546  |
| 1 | 2.119631  | -1.385805 | 5.550148  |
| 1 | 4.459659  | -3.073096 | -4.328519 |
| 1 | 3.139442  | -4.239177 | -4.173842 |
| 1 | 4.470430  | -1.927071 | -0.790780 |
| 1 | 5.366075  | -1.889579 | -2.333632 |
| 1 | 3.811079  | -1.025106 | -2.159067 |
| 1 | 3.909279  | -5.365198 | -2.145758 |
| 1 | 5.395959  | -4.446203 | -2.502124 |
| 1 | 4.715134  | -4.425669 | -0.865362 |
| 1 | -0.755867 | 1.782357  | -7.874559 |
| 1 | -0.630656 | 0.487426  | -6.680968 |
| 1 | 1.083751  | 1.462004  | -5.220214 |
| 1 | 1.249618  | 2.537386  | -6.633657 |
| 1 | 1.135859  | 3.229043  | -5.006466 |
| 1 | -0.871017 | 4.623306  | -5.513028 |

|   |           |           |           |
|---|-----------|-----------|-----------|
| 1 | -0.647253 | 4.145487  | -7.216434 |
| 1 | -2.241784 | 3.975992  | -6.429641 |
| 1 | 2.040421  | 5.176859  | 3.488391  |
| 1 | 0.496619  | 5.975092  | 3.208107  |
| 1 | 0.625323  | 6.606394  | 0.853578  |
| 1 | 2.340528  | 6.366539  | 1.278306  |
| 1 | 1.697234  | 5.668817  | -0.217604 |
| 1 | 2.313164  | 3.288756  | 0.382082  |
| 1 | 3.193864  | 3.985719  | 1.769908  |
| 1 | 2.017449  | 2.662687  | 2.014375  |
| 1 | -1.037884 | -0.080982 | 2.696575  |
| 6 | 2.542655  | 0.002029  | 3.008196  |
| 6 | 3.341807  | 0.799100  | 3.843467  |
| 6 | 3.187966  | -0.927454 | 2.163718  |
| 6 | 4.727139  | 0.658233  | 3.851600  |
| 1 | 2.861883  | 1.520086  | 4.508128  |
| 6 | 4.568066  | -1.059833 | 2.187629  |
| 1 | 2.583450  | -1.548963 | 1.500649  |
| 6 | 5.372857  | -0.280181 | 3.035706  |
| 1 | 5.306675  | 1.291841  | 4.522195  |
| 1 | 5.033751  | -1.799072 | 1.530982  |
| 6 | 6.888106  | -0.493683 | 3.042828  |
| 6 | 7.596689  | 0.460266  | 4.008039  |
| 1 | 8.680937  | 0.278669  | 3.977394  |

|   |          |           |          |
|---|----------|-----------|----------|
| 1 | 7.423264 | 1.511852  | 3.735712 |
| 1 | 7.259904 | 0.310131  | 5.044338 |
| 6 | 7.186451 | -1.938629 | 3.477800 |
| 1 | 6.738620 | -2.667874 | 2.787302 |
| 1 | 8.272990 | -2.114877 | 3.498618 |
| 1 | 6.783418 | -2.132422 | 4.483123 |
| 6 | 7.443852 | -0.257797 | 1.628555 |
| 1 | 7.238526 | 0.770674  | 1.296835 |
| 1 | 8.533329 | -0.415201 | 1.617326 |
| 1 | 6.996282 | -0.944985 | 0.896090 |

---

**Table S17**

**[N-Int]<sup>3</sup>**

E : -3313.93388839 Hartree

G : -3312.380112 Hartree

---

| Atomic<br>Number | Coordinates (Angstroms) |           |           |
|------------------|-------------------------|-----------|-----------|
|                  | X                       | Y         | Z         |
| 7                | 0.501880                | -0.514091 | -0.056431 |
| 6                | 1.359706                | 0.437217  | 0.141221  |
| 6                | 0.981537                | 1.797205  | 0.141868  |
| 6                | 0.950923                | -1.837524 | -0.117714 |

|   |           |           |           |
|---|-----------|-----------|-----------|
| 6 | 1.651836  | -2.337802 | -1.226784 |
| 6 | 0.626197  | -2.748328 | 0.898369  |
| 6 | 2.055077  | -1.561508 | -2.468532 |
| 6 | 2.022930  | -3.682369 | -1.303940 |
| 6 | -0.249520 | -2.476062 | 2.107884  |
| 6 | 1.068257  | -4.070416 | 0.856910  |
| 6 | 2.445522  | -2.705118 | -3.455642 |
| 6 | 3.152852  | -0.538161 | -2.179158 |
| 6 | 0.952193  | -0.653260 | -2.997537 |
| 6 | 2.682081  | -4.006154 | -2.636579 |
| 6 | 1.764510  | -4.559901 | -0.250426 |
| 6 | 0.003032  | -3.736092 | 2.992480  |
| 6 | -1.710671 | -2.274884 | 1.703529  |
| 6 | 0.042879  | -1.152811 | 2.800045  |
| 6 | 0.706847  | -4.824792 | 2.127026  |
| 1 | 3.317163  | -2.429898 | -4.066462 |
| 1 | 1.601098  | -2.861354 | -4.143138 |
| 6 | 2.760738  | 0.744326  | -2.592246 |
| 6 | 4.319039  | -0.694175 | -1.450928 |
| 6 | 1.403051  | 0.665207  | -3.146509 |
| 6 | -0.386411 | -0.944387 | -3.172980 |
| 6 | 4.174458  | -4.319128 | -2.463570 |
| 6 | 1.997315  | -5.202349 | -3.307579 |
| 1 | 2.084606  | -5.604676 | -0.296763 |

|   |           |           |           |
|---|-----------|-----------|-----------|
| 1 | -0.935303 | -4.102128 | 3.432998  |
| 1 | 0.659937  | -3.448542 | 3.826410  |
| 6 | -2.184992 | -1.024217 | 2.129713  |
| 6 | -2.561172 | -3.136565 | 1.037679  |
| 6 | -1.084530 | -0.318753 | 2.802785  |
| 6 | 1.244693  | -0.688383 | 3.297556  |
| 6 | -0.204808 | -6.023780 | 1.839135  |
| 6 | 1.980515  | -5.324955 | 2.821817  |
| 6 | 3.520549  | 1.850234  | -2.237455 |
| 6 | 5.102018  | 0.414677  | -1.080638 |
| 1 | 4.591315  | -1.685237 | -1.087797 |
| 6 | 0.537322  | 1.649170  | -3.600931 |
| 6 | -1.300638 | 0.066778  | -3.519028 |
| 1 | -0.746983 | -1.953441 | -2.953701 |
| 1 | 4.315640  | -5.174363 | -1.785488 |
| 1 | 4.627049  | -4.572542 | -3.434533 |
| 1 | 4.722820  | -3.462578 | -2.049596 |
| 1 | 2.156863  | -6.125605 | -2.730014 |
| 1 | 2.404831  | -5.361443 | -4.317966 |
| 1 | 0.913554  | -5.034334 | -3.392137 |
| 6 | -3.493424 | -0.648820 | 1.856138  |
| 6 | -3.910711 | -2.802686 | 0.810585  |
| 1 | -2.182882 | -4.099741 | 0.689805  |
| 6 | -0.999605 | 0.959112  | 3.334011  |

|   |           |           |           |
|---|-----------|-----------|-----------|
| 6 | 1.361166  | 0.622535  | 3.797557  |
| 1 | 2.125254  | -1.335085 | 3.254133  |
| 1 | 0.290110  | -6.735906 | 1.161649  |
| 1 | -0.447820 | -6.553982 | 2.772668  |
| 1 | -1.148287 | -5.712527 | 1.371040  |
| 1 | 2.501738  | -6.069933 | 2.201543  |
| 1 | 1.734007  | -5.795889 | 3.786147  |
| 1 | 2.673969  | -4.491608 | 3.008748  |
| 6 | 4.685038  | 1.709448  | -1.466223 |
| 1 | 3.162256  | 2.847673  | -2.500984 |
| 6 | 6.389855  | 0.169241  | -0.288917 |
| 6 | -0.818079 | 1.356985  | -3.826622 |
| 1 | 0.903812  | 2.667531  | -3.752141 |
| 6 | -2.793588 | -0.261515 | -3.438793 |
| 6 | -4.372688 | -1.525228 | 1.193798  |
| 1 | -3.845638 | 0.335018  | 2.176449  |
| 6 | -4.812544 | -3.876275 | 0.184945  |
| 6 | 0.213433  | 1.444740  | 3.850835  |
| 1 | -1.880404 | 1.605407  | 3.324014  |
| 6 | 2.741176  | 1.102482  | 4.256861  |
| 6 | 5.369908  | 2.987108  | -0.968120 |
| 6 | 6.788864  | 1.443017  | 0.470223  |
| 6 | 6.222272  | -0.955521 | 0.742160  |
| 6 | 7.496162  | -0.239094 | -1.277993 |

|   |           |           |           |
|---|-----------|-----------|-----------|
| 6 | -1.714022 | 2.467611  | -4.383817 |
| 6 | -3.182576 | -1.269270 | -4.530924 |
| 6 | -3.624573 | 1.024376  | -3.569342 |
| 6 | -3.101473 | -0.871377 | -2.062320 |
| 6 | -5.814333 | -1.064264 | 0.951333  |
| 6 | -6.289601 | -3.461090 | 0.275421  |
| 6 | -4.427362 | -4.113938 | -1.284599 |
| 6 | -4.653847 | -5.202911 | 0.946412  |
| 6 | 0.224610  | 2.868910  | 4.418574  |
| 6 | 2.749210  | 2.632616  | 4.380223  |
| 6 | 3.086859  | 0.447665  | 5.604689  |
| 6 | 3.819977  | 0.714373  | 3.234499  |
| 6 | 6.768047  | 2.678815  | -0.412180 |
| 6 | 5.527783  | 4.018903  | -2.093594 |
| 6 | 4.486550  | 3.591779  | 0.140291  |
| 1 | 7.790653  | 1.298141  | 0.905737  |
| 1 | 6.095861  | 1.577071  | 1.318048  |
| 1 | 5.342223  | -0.777730 | 1.377168  |
| 1 | 7.112202  | -0.995443 | 1.388748  |
| 1 | 6.115932  | -1.944076 | 0.274040  |
| 1 | 7.210555  | -1.160675 | -1.806854 |
| 1 | 8.440583  | -0.425770 | -0.742566 |
| 1 | 7.671225  | 0.534742  | -2.038254 |
| 6 | -3.116396 | 1.917742  | -4.686847 |

|   |           |           |           |
|---|-----------|-----------|-----------|
| 6 | -1.809871 | 3.614765  | -3.368608 |
| 6 | -1.118499 | 3.006770  | -5.693115 |
| 1 | -2.584076 | -2.188168 | -4.444000 |
| 1 | -4.244842 | -1.545024 | -4.435307 |
| 1 | -3.019213 | -0.860654 | -5.538612 |
| 1 | -3.579204 | 1.573521  | -2.612099 |
| 1 | -4.681219 | 0.753041  | -3.726318 |
| 1 | -2.770500 | -0.203821 | -1.252067 |
| 1 | -4.188478 | -1.020764 | -1.959573 |
| 1 | -2.616538 | -1.845340 | -1.906788 |
| 6 | -6.501452 | -1.995465 | -0.058538 |
| 6 | -5.853134 | 0.360659  | 0.377648  |
| 6 | -6.576163 | -1.069623 | 2.287949  |
| 1 | -6.658835 | -3.661834 | 1.294239  |
| 1 | -6.879404 | -4.103596 | -0.397693 |
| 1 | -3.354480 | -4.340625 | -1.378985 |
| 1 | -4.993967 | -4.967497 | -1.688009 |
| 1 | -4.637107 | -3.234960 | -1.908636 |
| 1 | -4.809506 | -5.056395 | 2.025485  |
| 1 | -5.398593 | -5.928481 | 0.583866  |
| 1 | -3.659760 | -5.649039 | 0.800775  |
| 6 | 1.546960  | 3.153071  | 5.146928  |
| 6 | -0.919382 | 3.056529  | 5.426467  |
| 6 | 0.035219  | 3.867900  | 3.267034  |

|   |           |           |           |
|---|-----------|-----------|-----------|
| 1 | 3.688096  | 2.946585  | 4.864079  |
| 1 | 2.758207  | 3.066312  | 3.365163  |
| 1 | 3.088613  | -0.648253 | 5.509275  |
| 1 | 4.086282  | 0.765342  | 5.941505  |
| 1 | 2.356524  | 0.708562  | 6.383192  |
| 1 | 3.545147  | 1.059070  | 2.224245  |
| 1 | 4.779049  | 1.181569  | 3.510541  |
| 1 | 3.983980  | -0.371485 | 3.194290  |
| 1 | 7.126440  | 3.558085  | 0.146924  |
| 1 | 7.466891  | 2.543722  | -1.253792 |
| 1 | 6.049237  | 3.580766  | -2.957347 |
| 1 | 6.120093  | 4.872649  | -1.729839 |
| 1 | 4.562179  | 4.413215  | -2.438971 |
| 1 | 3.473355  | 3.795023  | -0.240143 |
| 1 | 4.917880  | 4.536923  | 0.506151  |
| 1 | 4.382027  | 2.903706  | 0.992531  |
| 1 | -3.800803 | 2.763928  | -4.859352 |
| 1 | -3.084234 | 1.345198  | -5.629029 |
| 1 | -0.817200 | 4.032560  | -3.145452 |
| 1 | -2.440235 | 4.427854  | -3.764860 |
| 1 | -2.234303 | 3.269460  | -2.416344 |
| 1 | -0.970361 | 2.194351  | -6.419756 |
| 1 | -1.802664 | 3.747487  | -6.136191 |
| 1 | -0.149593 | 3.499845  | -5.530176 |

|   |           |           |           |
|---|-----------|-----------|-----------|
| 1 | -7.576095 | -1.754484 | -0.090457 |
| 1 | -6.105091 | -1.784209 | -1.066414 |
| 1 | -5.214936 | 0.445181  | -0.515534 |
| 1 | -6.884601 | 0.617308  | 0.090461  |
| 1 | -5.524511 | 1.110282  | 1.112460  |
| 1 | -6.093088 | -0.392646 | 3.007788  |
| 1 | -7.613926 | -0.731373 | 2.140244  |
| 1 | -6.596093 | -2.070188 | 2.741712  |
| 1 | 1.631447  | 4.238547  | 5.315261  |
| 1 | 1.517541  | 2.687107  | 6.145553  |
| 1 | -0.880536 | 2.287842  | 6.212448  |
| 1 | -0.831717 | 4.044745  | 5.904329  |
| 1 | -1.906843 | 3.007386  | 4.946397  |
| 1 | -0.893466 | 3.660431  | 2.712982  |
| 1 | -0.016347 | 4.897250  | 3.656569  |
| 1 | 0.861309  | 3.807511  | 2.543380  |
| 1 | 2.430666  | 0.221832  | 0.298176  |
| 6 | -0.239063 | 2.521327  | 0.048695  |
| 6 | -0.257862 | 3.923329  | -0.075639 |
| 6 | -1.478346 | 1.845345  | 0.156631  |
| 6 | -1.458079 | 4.626947  | -0.050978 |
| 1 | 0.688806  | 4.460305  | -0.166692 |
| 6 | -2.662876 | 2.561890  | 0.183369  |
| 1 | -1.476175 | 0.758130  | 0.236725  |

|   |           |          |           |
|---|-----------|----------|-----------|
| 6 | -2.686198 | 3.965798 | 0.091771  |
| 1 | -1.425891 | 5.712069 | -0.142582 |
| 1 | -3.598194 | 2.005425 | 0.275080  |
| 6 | -4.028885 | 4.694407 | 0.150377  |
| 6 | -3.873373 | 6.201407 | -0.067276 |
| 1 | -4.860731 | 6.684432 | -0.033129 |
| 1 | -3.248155 | 6.660786 | 0.712387  |
| 1 | -3.422929 | 6.420034 | -1.047159 |
| 6 | -4.962965 | 4.136507 | -0.937334 |
| 1 | -5.162258 | 3.064503 | -0.792171 |
| 1 | -5.929031 | 4.663568 | -0.913108 |
| 1 | -4.521472 | 4.268068 | -1.936883 |
| 6 | -4.656080 | 4.455565 | 1.534471  |
| 1 | -4.001496 | 4.841847 | 2.330315  |
| 1 | -5.630365 | 4.962963 | 1.607586  |
| 1 | -4.816354 | 3.382686 | 1.718114  |

---

**Table S18**

**[P-Int]<sup>3</sup>**

E : -3600.47984284 Hartree

G : -3598.936658 Hartree

---

Atomic

Coordinates (Angstroms)

| Number | X         | Y         | Z         |
|--------|-----------|-----------|-----------|
| 15     | -0.195534 | -0.414044 | -0.369838 |
| 6      | 1.007818  | 0.753705  | 0.257884  |
| 6      | 0.708439  | 2.055192  | 0.352288  |
| 6      | 0.742152  | -1.997283 | -0.200550 |
| 6      | 1.584835  | -2.490455 | -1.213046 |
| 6      | 0.516291  | -2.836963 | 0.905318  |
| 6      | 2.100417  | -1.745002 | -2.447150 |
| 6      | 2.114713  | -3.783997 | -1.159024 |
| 6      | -0.313402 | -2.522732 | 2.151751  |
| 6      | 1.076492  | -4.116097 | 0.976802  |
| 6      | 2.729753  | -2.881976 | -3.301964 |
| 6      | 3.069697  | -0.636890 | -2.031599 |
| 6      | 1.024299  | -0.935011 | -3.154873 |
| 6      | 2.904562  | -4.143384 | -2.406840 |
| 6      | 1.863657  | -4.608501 | -0.063710 |
| 6      | -0.039522 | -3.756038 | 3.072592  |
| 6      | -1.793143 | -2.274401 | 1.861230  |
| 6      | 0.069876  | -1.207034 | 2.823057  |
| 6      | 0.688876  | -4.851955 | 2.246429  |
| 1      | 3.679540  | -2.557788 | -3.750605 |
| 1      | 2.044875  | -3.113015 | -4.131151 |
| 6      | 2.598283  | 0.619763  | -2.434020 |

|   |           |           |           |
|---|-----------|-----------|-----------|
| 6 | 4.236172  | -0.722129 | -1.290965 |
| 6 | 1.312180  | 0.437052  | -3.116036 |
| 6 | -0.183793 | -1.371158 | -3.665548 |
| 6 | 4.375357  | -4.436793 | -2.084740 |
| 6 | 2.291931  | -5.375162 | -3.086759 |
| 1 | 2.272359  | -5.622793 | -0.022492 |
| 1 | -0.973801 | -4.129699 | 3.515106  |
| 1 | 0.603271  | -3.434926 | 3.904557  |
| 6 | -2.198934 | -1.018543 | 2.346199  |
| 6 | -2.710489 | -3.086438 | 1.224027  |
| 6 | -1.034823 | -0.352916 | 2.947269  |
| 6 | 1.312307  | -0.789610 | 3.259064  |
| 6 | -0.238677 | -6.030914 | 1.922101  |
| 6 | 1.925091  | -5.370061 | 2.989628  |
| 6 | 3.273665  | 1.771880  | -2.057644 |
| 6 | 4.959521  | 0.431219  | -0.937847 |
| 1 | 4.590683  | -1.697968 | -0.959798 |
| 6 | 0.370207  | 1.357103  | -3.549531 |
| 6 | -1.160968 | -0.452653 | -4.089744 |
| 1 | -0.403834 | -2.441692 | -3.675198 |
| 1 | 4.458830  | -5.283411 | -1.386481 |
| 1 | 4.924106  | -4.696623 | -3.002869 |
| 1 | 4.872506  | -3.571515 | -1.626319 |
| 1 | 2.385643  | -6.267761 | -2.449594 |

|   |           |           |           |
|---|-----------|-----------|-----------|
| 1 | 2.803843  | -5.582660 | -4.039241 |
| 1 | 1.223673  | -5.214035 | -3.294102 |
| 6 | -3.499779 | -0.584184 | 2.148581  |
| 6 | -4.051467 | -2.683691 | 1.058904  |
| 1 | -2.391403 | -4.056338 | 0.836444  |
| 6 | -0.881820 | 0.904877  | 3.512298  |
| 6 | 1.490997  | 0.490949  | 3.815450  |
| 1 | 2.170106  | -1.456252 | 3.138363  |
| 1 | 0.264715  | -6.754731 | 1.263411  |
| 1 | -0.534817 | -6.553138 | 2.844852  |
| 1 | -1.151650 | -5.690522 | 1.413384  |
| 1 | 2.453302  | -6.133099 | 2.397811  |
| 1 | 1.634864  | -5.827280 | 3.948149  |
| 1 | 2.628739  | -4.549865 | 3.195664  |
| 6 | 4.453504  | 1.701099  | -1.302745 |
| 1 | 2.854532  | 2.744802  | -2.321572 |
| 6 | 6.316492  | 0.265516  | -0.247529 |
| 6 | -0.878741 | 0.930594  | -4.029761 |
| 1 | 0.584372  | 2.424492  | -3.468464 |
| 6 | -2.500245 | -1.012376 | -4.580043 |
| 6 | -4.439483 | -1.398090 | 1.490761  |
| 1 | -3.794268 | 0.406345  | 2.504112  |
| 6 | -5.023917 | -3.682232 | 0.419650  |
| 6 | 0.374920  | 1.344602  | 3.962188  |

|   |           |           |           |
|---|-----------|-----------|-----------|
| 1 | -1.745685 | 1.568898  | 3.591748  |
| 6 | 2.900529  | 0.898510  | 4.251607  |
| 6 | 5.076880  | 3.014619  | -0.814845 |
| 6 | 6.674000  | 1.546914  | 0.518588  |
| 6 | 6.326643  | -0.901849 | 0.747486  |
| 6 | 7.368208  | -0.022191 | -1.335278 |
| 6 | -1.919008 | 1.998622  | -4.377830 |
| 6 | -2.304491 | -1.622809 | -5.977981 |
| 6 | -3.568088 | 0.091328  | -4.632003 |
| 6 | -3.012260 | -2.100426 | -3.624840 |
| 6 | -5.851918 | -0.842088 | 1.283529  |
| 6 | -6.472762 | -3.197043 | 0.581324  |
| 6 | -4.695994 | -3.848837 | -1.072077 |
| 6 | -4.906941 | -5.052648 | 1.105594  |
| 6 | 0.467576  | 2.754403  | 4.562141  |
| 6 | 2.977941  | 2.423000  | 4.408094  |
| 6 | 3.239720  | 0.198010  | 5.578679  |
| 6 | 3.942021  | 0.480591  | 3.205038  |
| 6 | 6.519060  | 2.795917  | -0.332162 |
| 6 | 5.108758  | 4.074329  | -1.924919 |
| 6 | 4.214007  | 3.541182  | 0.347338  |
| 1 | 7.707923  | 1.462920  | 0.890686  |
| 1 | 6.025439  | 1.615558  | 1.407764  |
| 1 | 5.496057  | -0.819222 | 1.461375  |

|   |           |           |           |
|---|-----------|-----------|-----------|
| 1 | 7.270957  | -0.892541 | 1.312972  |
| 1 | 6.257438  | -1.878756 | 0.248450  |
| 1 | 7.121311  | -0.956323 | -1.861566 |
| 1 | 8.367279  | -0.132082 | -0.884134 |
| 1 | 7.408830  | 0.776981  | -2.088154 |
| 6 | -3.043297 | 1.385989  | -5.224522 |
| 6 | -2.483389 | 2.564098  | -3.061800 |
| 6 | -1.300245 | 3.149877  | -5.182854 |
| 1 | -1.527889 | -2.401541 | -5.954771 |
| 1 | -3.242114 | -2.081065 | -6.330028 |
| 1 | -1.990831 | -0.864318 | -6.709454 |
| 1 | -3.938354 | 0.278389  | -3.610817 |
| 1 | -4.429574 | -0.280528 | -5.209840 |
| 1 | -3.004916 | -1.737806 | -2.585283 |
| 1 | -4.045190 | -2.371801 | -3.894511 |
| 1 | -2.412041 | -3.020297 | -3.668824 |
| 6 | -6.620907 | -1.715814 | 0.281948  |
| 6 | -5.793645 | 0.585334  | 0.715074  |
| 6 | -6.588606 | -0.802550 | 2.632977  |
| 1 | -6.807526 | -3.399884 | 1.611889  |
| 1 | -7.121770 | -3.795309 | -0.077975 |
| 1 | -3.643434 | -4.134638 | -1.216859 |
| 1 | -5.329965 | -4.632703 | -1.515426 |
| 1 | -4.861989 | -2.915048 | -1.625214 |

|   |           |           |           |
|---|-----------|-----------|-----------|
| 1 | -5.030863 | -4.957981 | 2.194515  |
| 1 | -5.692003 | -5.724368 | 0.724966  |
| 1 | -3.937782 | -5.533736 | 0.911303  |
| 6 | 1.830763  | 2.971043  | 5.237135  |
| 6 | -0.621041 | 2.963274  | 5.625686  |
| 6 | 0.271771  | 3.795114  | 3.446723  |
| 1 | 3.947826  | 2.687254  | 4.859535  |
| 1 | 2.961296  | 2.879686  | 3.403616  |
| 1 | 3.198369  | -0.894433 | 5.455218  |
| 1 | 4.255505  | 0.469138  | 5.907487  |
| 1 | 2.531262  | 0.465282  | 6.374833  |
| 1 | 3.664484  | 0.838124  | 2.199800  |
| 1 | 4.923242  | 0.908420  | 3.466812  |
| 1 | 4.065536  | -0.610248 | 3.157331  |
| 1 | 6.838473  | 3.686933  | 0.232043  |
| 1 | 7.185792  | 2.731798  | -1.207397 |
| 1 | 5.602722  | 3.684711  | -2.827323 |
| 1 | 5.670788  | 4.954429  | -1.576313 |
| 1 | 4.103392  | 4.418539  | -2.204455 |
| 1 | 3.164970  | 3.656094  | 0.033101  |
| 1 | 4.587554  | 4.517938  | 0.693438  |
| 1 | 4.220768  | 2.845167  | 1.199029  |
| 1 | -3.855949 | 2.123729  | -5.322296 |
| 1 | -2.663138 | 1.203125  | -6.243856 |

|   |           |           |           |
|---|-----------|-----------|-----------|
| 1 | -1.686254 | 3.033100  | -2.464088 |
| 1 | -3.251781 | 3.325540  | -3.271394 |
| 1 | -2.928555 | 1.777426  | -2.435520 |
| 1 | -0.774245 | 2.772332  | -6.072282 |
| 1 | -2.096540 | 3.832758  | -5.517030 |
| 1 | -0.592083 | 3.742340  | -4.587332 |
| 1 | -7.682031 | -1.419558 | 0.292838  |
| 1 | -6.248366 | -1.503672 | -0.734289 |
| 1 | -5.144881 | 0.629971  | -0.173338 |
| 1 | -6.804825 | 0.909834  | 0.424094  |
| 1 | -5.418747 | 1.307764  | 1.454625  |
| 1 | -6.039302 | -0.180954 | 3.355250  |
| 1 | -7.595733 | -0.374913 | 2.507275  |
| 1 | -6.688106 | -1.805335 | 3.071389  |
| 1 | 1.964095  | 4.048763  | 5.422231  |
| 1 | 1.827228  | 2.486559  | 6.227173  |
| 1 | -0.580150 | 2.173642  | 6.390627  |
| 1 | -0.468879 | 3.934102  | 6.122444  |
| 1 | -1.630581 | 2.969859  | 5.191658  |
| 1 | -0.697801 | 3.660220  | 2.943645  |
| 1 | 0.302108  | 4.811990  | 3.869115  |
| 1 | 1.050368  | 3.712024  | 2.673718  |
| 1 | 2.008221  | 0.393742  | 0.534530  |
| 6 | -0.427564 | 2.921846  | 0.206276  |

|   |           |          |           |
|---|-----------|----------|-----------|
| 6 | -0.281321 | 4.250809 | -0.222337 |
| 6 | -1.726677 | 2.472821 | 0.530892  |
| 6 | -1.382506 | 5.099118 | -0.321171 |
| 1 | 0.716313  | 4.620593 | -0.468616 |
| 6 | -2.813317 | 3.326957 | 0.424411  |
| 1 | -1.872495 | 1.445828 | 0.870817  |
| 6 | -2.672394 | 4.660411 | 0.003472  |
| 1 | -1.218588 | 6.123446 | -0.654287 |
| 1 | -3.802165 | 2.940190 | 0.679140  |
| 6 | -3.905689 | 5.564624 | -0.058172 |
| 6 | -3.557917 | 6.975470 | -0.539944 |
| 1 | -4.469817 | 7.589179 | -0.576088 |
| 1 | -2.846325 | 7.469838 | 0.137738  |
| 1 | -3.121879 | 6.960174 | -1.549814 |
| 6 | -4.938083 | 4.960364 | -1.023878 |
| 1 | -5.232872 | 3.944851 | -0.721250 |
| 1 | -5.845015 | 5.583884 | -1.048492 |
| 1 | -4.529443 | 4.904731 | -2.043269 |
| 6 | -4.520771 | 5.665961 | 1.348108  |
| 1 | -3.793208 | 6.079358 | 2.062263  |
| 1 | -5.403570 | 6.323454 | 1.330980  |
| 1 | -4.839750 | 4.681502 | 1.719929  |

**Table S19****[As-Int]<sup>3</sup>**

E : -5494.87227526 Hartree

G : -5493.330873 Hartree

---

| Atomic | Coordinates (Angstroms) |           |           |
|--------|-------------------------|-----------|-----------|
| Number | X                       | Y         | Z         |
| 33     | -0.338295               | -0.368202 | -0.401475 |
| 6      | 0.951679                | 0.893906  | 0.317838  |
| 6      | 0.617597                | 2.167421  | 0.429405  |
| 6      | 0.733632                | -2.013567 | -0.244821 |
| 6      | 1.595723                | -2.463483 | -1.261062 |
| 6      | 0.529255                | -2.875326 | 0.847259  |
| 6      | 2.112158                | -1.684581 | -2.478453 |
| 6      | 2.155539                | -3.746100 | -1.227713 |
| 6      | -0.278367               | -2.592013 | 2.117058  |
| 6      | 1.109926                | -4.147273 | 0.891899  |
| 6      | 2.789132                | -2.787775 | -3.340517 |
| 6      | 3.043656                | -0.555827 | -2.034206 |
| 6      | 1.024799                | -0.895479 | -3.190967 |
| 6      | 2.968472                | -4.065573 | -2.470855 |
| 6      | 1.910888                | -4.601047 | -0.154743 |
| 6      | 0.001000                | -3.853338 | 2.999672  |

---

|   |           |           |           |
|---|-----------|-----------|-----------|
| 6 | -1.762477 | -2.314380 | 1.880940  |
| 6 | 0.142605  | -1.305847 | 2.822791  |
| 6 | 0.718058  | -4.924855 | 2.134503  |
| 1 | 3.743859  | -2.431809 | -3.753172 |
| 1 | 2.134933  | -3.013719 | -4.195413 |
| 6 | 2.532870  | 0.693936  | -2.407649 |
| 6 | 4.224663  | -0.622478 | -1.314157 |
| 6 | 1.258767  | 0.484660  | -3.106011 |
| 6 | -0.152095 | -1.362411 | -3.745434 |
| 6 | 4.438046  | -4.344773 | -2.131326 |
| 6 | 2.384761  | -5.290687 | -3.187498 |
| 1 | 2.336893  | -5.608822 | -0.135233 |
| 1 | -0.929983 | -4.238286 | 3.439360  |
| 1 | 0.652439  | -3.559016 | 3.834677  |
| 6 | -2.140263 | -1.081927 | 2.443669  |
| 6 | -2.704360 | -3.075436 | 1.216598  |
| 6 | -0.949694 | -0.453188 | 3.032605  |
| 6 | 1.404495  | -0.918209 | 3.230490  |
| 6 | -0.227459 | -6.075641 | 1.762838  |
| 6 | 1.945287  | -5.488747 | 2.857856  |
| 6 | 3.176703  | 1.858049  | -2.011612 |
| 6 | 4.920557  | 0.543927  | -0.951060 |
| 1 | 4.617417  | -1.594672 | -1.017372 |
| 6 | 0.282719  | 1.380533  | -3.516693 |

|   |           |           |           |
|---|-----------|-----------|-----------|
| 6 | -1.158738 | -0.470635 | -4.156947 |
| 1 | -0.324212 | -2.440015 | -3.801652 |
| 1 | 4.523568  | -5.211796 | -1.458862 |
| 1 | 5.008189  | -4.565593 | -3.046631 |
| 1 | 4.910998  | -3.486862 | -1.634870 |
| 1 | 2.478990  | -6.195405 | -2.567786 |
| 1 | 2.916273  | -5.470985 | -4.134795 |
| 1 | 1.318233  | -5.139297 | -3.410655 |
| 6 | -3.438913 | -0.621278 | 2.302207  |
| 6 | -4.040036 | -2.640124 | 1.093666  |
| 1 | -2.406758 | -4.024273 | 0.764803  |
| 6 | -0.763807 | 0.776687  | 3.647775  |
| 6 | 1.614928  | 0.331517  | 3.842853  |
| 1 | 2.250031  | -1.586696 | 3.049227  |
| 1 | 0.264553  | -6.779246 | 1.074320  |
| 1 | -0.532384 | -6.630278 | 2.663600  |
| 1 | -1.134445 | -5.698918 | 1.268820  |
| 1 | 2.461842  | -6.237819 | 2.238578  |
| 1 | 1.647672  | -5.976736 | 3.798752  |
| 1 | 2.661525  | -4.687871 | 3.094287  |
| 6 | 4.367157  | 1.806301  | -1.273129 |
| 1 | 2.725201  | 2.823045  | -2.249352 |
| 6 | 6.304947  | 0.408927  | -0.310386 |
| 6 | -0.943642 | 0.919990  | -4.022971 |

|   |           |           |           |
|---|-----------|-----------|-----------|
| 1 | 0.448564  | 2.451728  | -3.387787 |
| 6 | -2.451422 | -1.064825 | -4.725755 |
| 6 | -4.401893 | -1.379464 | 1.612566  |
| 1 | -3.711716 | 0.350077  | 2.721642  |
| 6 | -5.033463 | -3.568982 | 0.385944  |
| 6 | 0.513418  | 1.187882  | 4.065132  |
| 1 | -1.618411 | 1.441310  | 3.793158  |
| 6 | 3.039621  | 0.695294  | 4.269421  |
| 6 | 4.950479  | 3.124318  | -0.748453 |
| 6 | 6.631283  | 1.672003  | 0.498815  |
| 6 | 6.403750  | -0.800043 | 0.627854  |
| 6 | 7.329443  | 0.217619  | -1.444961 |
| 6 | -2.044288 | 1.948690  | -4.295307 |
| 6 | -2.185895 | -1.538270 | -6.165027 |
| 6 | -3.581437 | -0.023917 | -4.713419 |
| 6 | -2.915568 | -2.262014 | -3.883275 |
| 6 | -5.808669 | -0.790185 | 1.466038  |
| 6 | -6.473215 | -3.079315 | 0.603827  |
| 6 | -4.718537 | -3.609030 | -1.117523 |
| 6 | -4.931344 | -4.995052 | 0.949068  |
| 6 | 0.648629  | 2.578770  | 4.698610  |
| 6 | 3.151021  | 2.208343  | 4.499456  |
| 6 | 3.385929  | -0.073784 | 5.556471  |
| 6 | 4.056754  | 0.308936  | 3.188062  |

|   |           |           |           |
|---|-----------|-----------|-----------|
| 6 | 6.408986  | 2.946022  | -0.298746 |
| 6 | 4.919227  | 4.226708  | -1.815868 |
| 6 | 4.089432  | 3.570278  | 0.448502  |
| 1 | 7.676438  | 1.614584  | 0.843681  |
| 1 | 6.002008  | 1.680489  | 1.404290  |
| 1 | 5.596725  | -0.790931 | 1.372330  |
| 1 | 7.366393  | -0.771677 | 1.160794  |
| 1 | 6.362289  | -1.754986 | 0.085065  |
| 1 | 7.108976  | -0.706413 | -1.999913 |
| 1 | 8.348516  | 0.140349  | -1.033344 |
| 1 | 7.303703  | 1.046291  | -2.165811 |
| 6 | -3.127118 | 1.341282  | -5.197667 |
| 6 | -2.645858 | 2.363820  | -2.939268 |
| 6 | -1.497066 | 3.201919  | -4.991812 |
| 1 | -1.364850 | -2.270148 | -6.184564 |
| 1 | -3.085782 | -2.017314 | -6.582031 |
| 1 | -1.899878 | -0.702798 | -6.819769 |
| 1 | -3.975812 | 0.062227  | -3.687656 |
| 1 | -4.411530 | -0.399512 | -5.333293 |
| 1 | -2.924135 | -2.000058 | -2.814905 |
| 1 | -3.935667 | -2.553514 | -4.179339 |
| 1 | -2.273690 | -3.144710 | -4.013944 |
| 6 | -6.606138 | -1.578444 | 0.417122  |
| 6 | -5.736928 | 0.673263  | 0.999796  |

|   |           |           |           |
|---|-----------|-----------|-----------|
| 6 | -6.524641 | -0.837261 | 2.826389  |
| 1 | -6.796284 | -3.354472 | 1.621325  |
| 1 | -7.138962 | -3.618777 | -0.088666 |
| 1 | -3.678844 | -3.922643 | -1.293960 |
| 1 | -5.384022 | -4.322808 | -1.628274 |
| 1 | -4.847472 | -2.621856 | -1.582264 |
| 1 | -5.047087 | -4.993708 | 2.042988  |
| 1 | -5.728475 | -5.620314 | 0.517828  |
| 1 | -3.970797 | -5.471184 | 0.706275  |
| 6 | 2.023483  | 2.741821  | 5.364071  |
| 6 | -0.421927 | 2.797408  | 5.778090  |
| 6 | 0.469489  | 3.645064  | 3.604116  |
| 1 | 4.129816  | 2.428372  | 4.955387  |
| 1 | 3.138697  | 2.715105  | 3.519723  |
| 1 | 3.318788  | -1.158186 | 5.383475  |
| 1 | 4.412683  | 0.160827  | 5.879146  |
| 1 | 2.696861  | 0.171228  | 6.376542  |
| 1 | 3.773414  | 0.720534  | 2.205400  |
| 1 | 5.050055  | 0.704322  | 3.455083  |
| 1 | 4.158327  | -0.780330 | 3.084157  |
| 1 | 6.701677  | 3.826585  | 0.295551  |
| 1 | 7.062370  | 2.944622  | -1.186179 |
| 1 | 5.409866  | 3.892713  | -2.742128 |
| 1 | 5.453221  | 5.114205  | -1.442861 |

|   |           |           |           |
|---|-----------|-----------|-----------|
| 1 | 3.895779  | 4.541656  | -2.062615 |
| 1 | 3.032153  | 3.664965  | 0.156054  |
| 1 | 4.437758  | 4.541813  | 0.833530  |
| 1 | 4.131746  | 2.836426  | 1.267120  |
| 1 | -3.980634 | 2.036736  | -5.243910 |
| 1 | -2.733215 | 1.262175  | -6.224990 |
| 1 | -1.879052 | 2.827680  | -2.299975 |
| 1 | -3.457315 | 3.094110  | -3.089064 |
| 1 | -3.045059 | 1.501503  | -2.385432 |
| 1 | -0.936129 | 2.937835  | -5.900645 |
| 1 | -2.334857 | 3.854989  | -5.280949 |
| 1 | -0.839569 | 3.789296  | -4.335833 |
| 1 | -7.662848 | -1.270937 | 0.469204  |
| 1 | -6.248797 | -1.296601 | -0.587347 |
| 1 | -5.096224 | 0.773019  | 0.109935  |
| 1 | -6.746741 | 1.030370  | 0.744120  |
| 1 | -5.344807 | 1.336242  | 1.784741  |
| 1 | -5.953483 | -0.279896 | 3.583334  |
| 1 | -7.525528 | -0.384373 | 2.748306  |
| 1 | -6.636035 | -1.867741 | 3.191689  |
| 1 | 2.179685  | 3.808400  | 5.591258  |
| 1 | 2.021028  | 2.216768  | 6.333347  |
| 1 | -0.399710 | 1.989088  | 6.524060  |
| 1 | -0.232435 | 3.750528  | 6.295660  |

|   |           |          |           |
|---|-----------|----------|-----------|
| 1 | -1.435267 | 2.849296 | 5.356347  |
| 1 | -0.511615 | 3.545611 | 3.115658  |
| 1 | 0.535772  | 4.653539 | 4.042305  |
| 1 | 1.231179  | 3.551817 | 2.815457  |
| 1 | 1.943765  | 0.513164 | 0.593228  |
| 6 | -0.527794 | 3.018826 | 0.268172  |
| 6 | -0.429190 | 4.283981 | -0.332449 |
| 6 | -1.796915 | 2.602054 | 0.726075  |
| 6 | -1.551095 | 5.098134 | -0.477547 |
| 1 | 0.545438  | 4.628633 | -0.684659 |
| 6 | -2.904712 | 3.421911 | 0.572755  |
| 1 | -1.898916 | 1.622532 | 1.199072  |
| 6 | -2.812922 | 4.689234 | -0.027787 |
| 1 | -1.426130 | 6.071450 | -0.951138 |
| 1 | -3.870495 | 3.062083 | 0.933074  |
| 6 | -4.064211 | 5.564600 | -0.134754 |
| 6 | -3.781044 | 6.880747 | -0.863611 |
| 1 | -4.706633 | 7.470401 | -0.935088 |
| 1 | -3.036901 | 7.488324 | -0.327960 |
| 1 | -3.413577 | 6.703222 | -1.885364 |
| 6 | -5.161521 | 4.810277 | -0.903055 |
| 1 | -5.420153 | 3.858317 | -0.417010 |
| 1 | -6.075208 | 5.421998 | -0.955296 |
| 1 | -4.835771 | 4.589047 | -1.929681 |

|   |           |          |          |
|---|-----------|----------|----------|
| 6 | -4.566307 | 5.887043 | 1.283075 |
| 1 | -3.793154 | 6.417152 | 1.858608 |
| 1 | -5.462454 | 6.524714 | 1.234392 |
| 1 | -4.830546 | 4.971881 | 1.832531 |

---

**Table S20**

[Sb-Int]<sup>3</sup>

E : -3499.42411789 Hartree

G : -3497.886076 Hartree

---

| Atomic | Coordinates (Angstroms) |           |           |
|--------|-------------------------|-----------|-----------|
| Number | X                       | Y         | Z         |
| 51     | -0.692827               | -0.306736 | -0.150172 |
| 6      | 0.773153                | 1.149395  | 0.648760  |
| 6      | 0.542793                | 2.418080  | 0.519479  |
| 6      | 0.629920                | -2.068720 | -0.171294 |
| 6      | 1.419705                | -2.412782 | -1.283685 |
| 6      | 0.593017                | -3.003471 | 0.879634  |
| 6      | 1.821220                | -1.532426 | -2.471305 |
| 6      | 2.066776                | -3.653231 | -1.376713 |
| 6      | -0.151415               | -2.883981 | 2.210618  |
| 6      | 1.266396                | -4.229894 | 0.803436  |

|   |           |           |           |
|---|-----------|-----------|-----------|
| 6 | 2.443426  | -2.547842 | -3.472265 |
| 6 | 2.782133  | -0.441434 | -2.000740 |
| 6 | 0.711658  | -0.695207 | -3.082377 |
| 6 | 2.781086  | -3.854256 | -2.702936 |
| 6 | 1.990769  | -4.574037 | -0.335232 |
| 6 | 0.369053  | -4.116849 | 3.018971  |
| 6 | -1.668958 | -2.842338 | 2.054988  |
| 6 | 0.093133  | -1.590335 | 2.976502  |
| 6 | 1.074379  | -5.089561 | 2.039474  |
| 1 | 3.321381  | -2.119196 | -3.976297 |
| 1 | 1.697976  | -2.764824 | -4.251554 |
| 6 | 2.306626  | 0.831085  | -2.342193 |
| 6 | 3.957735  | -0.562800 | -1.280661 |
| 6 | 0.997076  | 0.675515  | -2.991166 |
| 6 | -0.498379 | -1.116862 | -3.602613 |
| 6 | 4.291328  | -4.056671 | -2.523656 |
| 6 | 2.204033  | -5.074958 | -3.432889 |
| 1 | 2.490068  | -5.545121 | -0.408548 |
| 1 | -0.446656 | -4.601225 | 3.574435  |
| 1 | 1.097184  | -3.759197 | 3.761036  |
| 6 | -2.218132 | -1.754247 | 2.754744  |
| 6 | -2.495841 | -3.668631 | 1.318826  |
| 6 | -1.113404 | -0.966745 | 3.324500  |
| 6 | 1.298484  | -1.012460 | 3.332169  |

|   |           |           |           |
|---|-----------|-----------|-----------|
| 6 | 0.204038  | -6.313780 | 1.723777  |
| 6 | 2.418628  | -5.560229 | 2.605589  |
| 6 | 3.017360  | 1.961385  | -1.963336 |
| 6 | 4.703185  | 0.569456  | -0.909481 |
| 1 | 4.299165  | -1.553513 | -0.980490 |
| 6 | 0.038470  | 1.607398  | -3.364417 |
| 6 | -1.489931 | -0.188603 | -3.967499 |
| 1 | -0.704496 | -2.188194 | -3.671372 |
| 1 | 4.495139  | -4.930376 | -1.886114 |
| 1 | 4.770469  | -4.228786 | -3.499630 |
| 1 | 4.769235  | -3.180883 | -2.065213 |
| 1 | 2.417920  | -6.003499 | -2.881843 |
| 1 | 2.645738  | -5.166585 | -4.437351 |
| 1 | 1.112865  | -4.984707 | -3.539309 |
| 6 | -3.584048 | -1.523226 | 2.715411  |
| 6 | -3.888469 | -3.461560 | 1.283167  |
| 1 | -2.058002 | -4.478395 | 0.731690  |
| 6 | -1.094243 | 0.243441  | 4.003617  |
| 6 | 1.335567  | 0.217522  | 4.013443  |
| 1 | 2.228970  | -1.507843 | 3.044434  |
| 1 | 0.669780  | -6.933222 | 0.942352  |
| 1 | 0.075423  | -6.934571 | 2.623803  |
| 1 | -0.793414 | -6.015710 | 1.373002  |
| 1 | 2.925130  | -6.244840 | 1.908244  |

|   |           |           |           |
|---|-----------|-----------|-----------|
| 1 | 2.269716  | -6.096467 | 3.555557  |
| 1 | 3.085533  | -4.704988 | 2.790263  |
| 6 | 4.213186  | 1.854909  | -1.238112 |
| 1 | 2.623332  | 2.946614  | -2.215220 |
| 6 | 6.068443  | 0.360247  | -0.247457 |
| 6 | -1.219382 | 1.192422  | -3.833260 |
| 1 | 0.245353  | 2.671705  | -3.240750 |
| 6 | -2.819956 | -0.737980 | -4.497547 |
| 6 | -4.437746 | -2.361915 | 1.976418  |
| 1 | -3.997637 | -0.664059 | 3.247095  |
| 6 | -4.733853 | -4.435542 | 0.455573  |
| 6 | 0.121157  | 0.855317  | 4.355424  |
| 1 | -2.037755 | 0.737088  | 4.246701  |
| 6 | 2.691662  | 0.821034  | 4.386404  |
| 6 | 4.872602  | 3.144383  | -0.734105 |
| 6 | 6.477759  | 1.622235  | 0.524310  |
| 6 | 6.063674  | -0.818816 | 0.733900  |
| 6 | 7.091174  | 0.055435  | -1.358005 |
| 6 | -2.296375 | 2.253580  | -4.068949 |
| 6 | -2.593345 | -1.275798 | -5.921042 |
| 6 | -3.904634 | 0.351405  | -4.520887 |
| 6 | -3.331696 | -1.879947 | -3.606039 |
| 6 | -5.936158 | -2.038915 | 1.970273  |
| 6 | -6.220803 | -4.278112 | 0.805171  |

|   |           |           |           |
|---|-----------|-----------|-----------|
| 6 | -4.507605 | -4.154571 | -1.039454 |
| 6 | -4.335049 | -5.890375 | 0.747566  |
| 6 | 0.050949  | 2.229691  | 5.037970  |
| 6 | 2.541234  | 2.342042  | 4.523653  |
| 6 | 3.163279  | 0.188498  | 5.708590  |
| 6 | 3.761946  | 0.543669  | 3.324048  |
| 6 | 6.325042  | 2.885841  | -0.305540 |
| 6 | 4.886669  | 4.235462  | -1.813516 |
| 6 | 4.058103  | 3.653710  | 0.469876  |
| 1 | 7.520171  | 1.509905  | 0.863838  |
| 1 | 5.858280  | 1.694035  | 1.433971  |
| 1 | 5.246286  | -0.721950 | 1.460994  |
| 1 | 7.016497  | -0.841327 | 1.284631  |
| 1 | 5.959440  | -1.787627 | 0.225247  |
| 1 | 6.806561  | -0.863151 | -1.892748 |
| 1 | 8.094096  | -0.091698 | -0.926480 |
| 1 | 7.143469  | 0.863778  | -2.100310 |
| 6 | -3.383201 | 1.695261  | -4.996968 |
| 6 | -2.887271 | 2.625026  | -2.696204 |
| 6 | -1.726945 | 3.525681  | -4.710535 |
| 1 | -1.802179 | -2.039958 | -5.927012 |
| 1 | -3.517592 | -1.732463 | -6.308371 |
| 1 | -2.285639 | -0.474497 | -6.608250 |
| 1 | -4.325364 | 0.462349  | -3.508738 |

|   |           |           |           |
|---|-----------|-----------|-----------|
| 1 | -4.732665 | 0.006418  | -5.160821 |
| 1 | -3.357051 | -1.566730 | -2.550801 |
| 1 | -4.353176 | -2.158808 | -3.909597 |
| 1 | -2.711039 | -2.784225 | -3.678576 |
| 6 | -6.650142 | -2.823012 | 0.858730  |
| 6 | -6.174252 | -0.543572 | 1.709376  |
| 6 | -6.531174 | -2.402552 | 3.341320  |
| 1 | -6.410845 | -4.756471 | 1.780369  |
| 1 | -6.819846 | -4.832972 | 0.065354  |
| 1 | -3.439641 | -4.233304 | -1.292643 |
| 1 | -5.062316 | -4.881020 | -1.654184 |
| 1 | -4.835997 | -3.143108 | -1.315403 |
| 1 | -4.366889 | -6.097282 | 1.827552  |
| 1 | -5.037205 | -6.572897 | 0.244280  |
| 1 | -3.326559 | -6.129009 | 0.381300  |
| 6 | 1.437673  | 2.712146  | 5.497932  |
| 6 | -0.863612 | 2.177439  | 6.270660  |
| 6 | -0.523016 | 3.242040  | 4.031924  |
| 1 | 3.502369  | 2.771868  | 4.849257  |
| 1 | 2.324054  | 2.762122  | 3.525231  |
| 1 | 3.323042  | -0.891479 | 5.572412  |
| 1 | 4.113687  | 0.640035  | 6.035561  |
| 1 | 2.422862  | 0.309475  | 6.510863  |
| 1 | 3.436833  | 0.860621  | 2.319901  |

|   |           |           |           |
|---|-----------|-----------|-----------|
| 1 | 4.679611  | 1.099019  | 3.575220  |
| 1 | 4.031450  | -0.520327 | 3.279420  |
| 1 | 6.685173  | 3.761333  | 0.258367  |
| 1 | 6.959144  | 2.817034  | -1.204516 |
| 1 | 5.341075  | 3.865105  | -2.744378 |
| 1 | 5.475541  | 5.095388  | -1.459228 |
| 1 | 3.878388  | 4.606606  | -2.046067 |
| 1 | 3.007451  | 3.823481  | 0.189452  |
| 1 | 4.477476  | 4.601275  | 0.843581  |
| 1 | 4.055441  | 2.924933  | 1.293777  |
| 1 | -4.206565 | 2.424917  | -5.060236 |
| 1 | -2.968199 | 1.600942  | -6.015008 |
| 1 | -2.114306 | 3.092311  | -2.067250 |
| 1 | -3.718495 | 3.339628  | -2.810804 |
| 1 | -3.256353 | 1.741347  | -2.155734 |
| 1 | -1.166331 | 3.293865  | -5.628466 |
| 1 | -2.554470 | 4.202883  | -4.974378 |
| 1 | -1.065526 | 4.073469  | -4.023772 |
| 1 | -7.738115 | -2.744201 | 1.013865  |
| 1 | -6.440248 | -2.339878 | -0.109837 |
| 1 | -5.653852 | -0.217899 | 0.796281  |
| 1 | -7.251879 | -0.360000 | 1.578031  |
| 1 | -5.833364 | 0.086870  | 2.542260  |
| 1 | -6.020786 | -1.849346 | 4.143374  |

|   |           |           |           |
|---|-----------|-----------|-----------|
| 1 | -7.601957 | -2.147123 | 3.374028  |
| 1 | -6.421604 | -3.474342 | 3.559201  |
| 1 | 1.396997  | 3.803309  | 5.641885  |
| 1 | 1.666961  | 2.284506  | 6.486650  |
| 1 | -0.528490 | 1.400514  | 6.973989  |
| 1 | -0.838926 | 3.147576  | 6.791079  |
| 1 | -1.909592 | 1.969725  | 6.004629  |
| 1 | -1.527303 | 2.937586  | 3.703079  |
| 1 | -0.605180 | 4.237154  | 4.496053  |
| 1 | 0.111084  | 3.322084  | 3.136000  |
| 1 | 1.621436  | 0.693938  | 1.172005  |
| 6 | -0.249775 | 3.506008  | 0.079684  |
| 6 | 0.201661  | 4.389744  | -0.924895 |
| 6 | -1.526433 | 3.756546  | 0.640091  |
| 6 | -0.582968 | 5.454789  | -1.351911 |
| 1 | 1.188827  | 4.233147  | -1.360700 |
| 6 | -2.295735 | 4.822969  | 0.200808  |
| 1 | -1.902058 | 3.084933  | 1.413285  |
| 6 | -1.849713 | 5.700989  | -0.803549 |
| 1 | -0.185342 | 6.106491  | -2.129558 |
| 1 | -3.280372 | 4.972047  | 0.649570  |
| 6 | -2.738285 | 6.863456  | -1.252261 |
| 6 | -2.056004 | 7.726404  | -2.317469 |
| 1 | -2.724558 | 8.549511  | -2.609049 |

|   |           |          |           |
|---|-----------|----------|-----------|
| 1 | -1.120830 | 8.167861 | -1.942403 |
| 1 | -1.826954 | 7.143833 | -3.222331 |
| 6 | -4.041866 | 6.305607 | -1.846665 |
| 1 | -4.579154 | 5.673188 | -1.125015 |
| 1 | -4.709786 | 7.129622 | -2.141680 |
| 1 | -3.828428 | 5.697203 | -2.737998 |
| 6 | -3.064710 | 7.752436 | -0.040899 |
| 1 | -2.143440 | 8.154211 | 0.406033  |
| 1 | -3.698286 | 8.598001 | -0.349898 |
| 1 | -3.603831 | 7.194417 | 0.737780  |

---

**Table S21**

**[Bi-Int]<sup>3</sup>**

E : -3473.78080259 Hartree

G : -3472.242875 Hartree

---

| Atomic<br>Number | Coordinates (Angstroms) |           |           |
|------------------|-------------------------|-----------|-----------|
|                  | X                       | Y         | Z         |
| 83               | -1.177453               | -0.507566 | -0.672876 |
| 6                | 1.543000                | 1.380685  | 0.771912  |
| 6                | 0.597686                | 2.135245  | 0.693666  |
| 6                | 0.463738                | -2.102487 | -0.305701 |

|   |           |           |           |
|---|-----------|-----------|-----------|
| 6 | 1.397185  | -2.472782 | -1.290372 |
| 6 | 0.443960  | -2.896300 | 0.857375  |
| 6 | 1.897424  | -1.667081 | -2.500734 |
| 6 | 2.145333  | -3.656854 | -1.195179 |
| 6 | -0.335403 | -2.648254 | 2.155180  |
| 6 | 1.246354  | -4.038451 | 0.988311  |
| 6 | 2.621981  | -2.735779 | -3.364055 |
| 6 | 2.826022  | -0.559054 | -1.998314 |
| 6 | 0.862203  | -0.852212 | -3.252967 |
| 6 | 2.915331  | -3.972935 | -2.467773 |
| 6 | 2.074504  | -4.451099 | -0.054325 |
| 6 | -0.112826 | -3.969579 | 2.957814  |
| 6 | -1.817282 | -2.346154 | 1.996220  |
| 6 | 0.132744  | -1.394645 | 2.898521  |
| 6 | 1.071635  | -4.742175 | 2.321887  |
| 1 | 3.534487  | -2.322198 | -3.816982 |
| 1 | 1.956344  | -3.027445 | -4.189961 |
| 6 | 2.360854  | 0.705547  | -2.380653 |
| 6 | 3.994817  | -0.663610 | -1.263419 |
| 6 | 1.108932  | 0.524694  | -3.128583 |
| 6 | -0.260574 | -1.291044 | -3.930736 |
| 6 | 4.413556  | -4.198493 | -2.231683 |
| 6 | 2.328836  | -5.241749 | -3.106197 |
| 1 | 2.650578  | -5.378446 | 0.021375  |

|   |           |           |           |
|---|-----------|-----------|-----------|
| 1 | -1.025584 | -4.577541 | 2.875928  |
| 1 | 0.044466  | -3.765145 | 4.026643  |
| 6 | -2.170322 | -1.151361 | 2.642267  |
| 6 | -2.769322 | -3.054715 | 1.288851  |
| 6 | -0.953114 | -0.565489 | 3.220737  |
| 6 | 1.410210  | -1.005656 | 3.261023  |
| 6 | 0.714886  | -6.220510 | 2.127028  |
| 6 | 2.348417  | -4.645835 | 3.168488  |
| 6 | 3.063051  | 1.847151  | -2.013454 |
| 6 | 4.755826  | 0.474987  | -0.943893 |
| 1 | 4.333730  | -1.646518 | -0.937730 |
| 6 | 0.180175  | 1.439662  | -3.599826 |
| 6 | -1.216448 | -0.378090 | -4.413571 |
| 1 | -0.435212 | -2.364710 | -4.031442 |
| 1 | 4.576673  | -5.020615 | -1.518380 |
| 1 | 4.910242  | -4.468675 | -3.176147 |
| 1 | 4.910860  | -3.302352 | -1.838231 |
| 1 | 2.494333  | -6.119134 | -2.462507 |
| 1 | 2.802417  | -5.436835 | -4.081208 |
| 1 | 1.245120  | -5.131853 | -3.259608 |
| 6 | -3.463896 | -0.663609 | 2.535874  |
| 6 | -4.081136 | -2.564270 | 1.150835  |
| 1 | -2.475069 | -3.974655 | 0.776306  |
| 6 | -0.747862 | 0.620286  | 3.912294  |

|   |           |           |           |
|---|-----------|-----------|-----------|
| 6 | 1.636046  | 0.186569  | 3.975331  |
| 1 | 2.257249  | -1.626854 | 2.966901  |
| 1 | 1.548904  | -6.773641 | 1.668832  |
| 1 | 0.489640  | -6.692738 | 3.095891  |
| 1 | -0.165116 | -6.326880 | 1.475528  |
| 1 | 3.198045  | -5.108401 | 2.643635  |
| 1 | 2.212274  | -5.166575 | 4.128960  |
| 1 | 2.610611  | -3.601403 | 3.384081  |
| 6 | 4.268329  | 1.754968  | -1.300418 |
| 1 | 2.662287  | 2.828034  | -2.276215 |
| 6 | 6.149244  | 0.280744  | -0.339361 |
| 6 | -1.006633 | 1.005593  | -4.214369 |
| 1 | 0.349670  | 2.505966  | -3.439301 |
| 6 | -2.449633 | -0.931598 | -5.134386 |
| 6 | -4.425405 | -1.338603 | 1.762263  |
| 1 | -3.725180 | 0.277472  | 3.025328  |
| 6 | -5.043569 | -3.344449 | 0.250946  |
| 6 | 0.540175  | 1.011747  | 4.310257  |
| 1 | -1.601172 | 1.263363  | 4.140405  |
| 6 | 3.064848  | 0.518474  | 4.416332  |
| 6 | 4.953645  | 3.054944  | -0.856074 |
| 6 | 6.564827  | 1.546074  | 0.422616  |
| 6 | 6.216083  | -0.909998 | 0.623827  |
| 6 | 7.124426  | 0.005186  | -1.500381 |

|   |           |           |           |
|---|-----------|-----------|-----------|
| 6 | -2.074312 | 2.058065  | -4.530390 |
| 6 | -2.058717 | -1.268242 | -6.584026 |
| 6 | -3.585628 | 0.101693  | -5.114253 |
| 6 | -2.969667 | -2.207375 | -4.455819 |
| 6 | -5.813910 | -0.703275 | 1.626063  |
| 6 | -6.484244 | -2.854367 | 0.453165  |
| 6 | -4.609863 | -3.135184 | -1.210707 |
| 6 | -5.008630 | -4.846300 | 0.568195  |
| 6 | 0.688849  | 2.363285  | 5.021612  |
| 6 | 3.185840  | 2.019785  | 4.709095  |
| 6 | 3.389274  | -0.311048 | 5.672127  |
| 6 | 4.094985  | 0.169165  | 3.337463  |
| 6 | 6.405990  | 2.800757  | -0.419658 |
| 6 | 4.980314  | 4.093083  | -1.986683 |
| 6 | 4.158521  | 3.635345  | 0.327534  |
| 1 | 7.610745  | 1.438385  | 0.752843  |
| 1 | 5.953407  | 1.623197  | 1.337809  |
| 1 | 5.437408  | -0.842857 | 1.393985  |
| 1 | 7.196413  | -0.920879 | 1.124116  |
| 1 | 6.105829  | -1.873270 | 0.106083  |
| 1 | 6.844082  | -0.927089 | -2.013163 |
| 1 | 8.152966  | -0.103805 | -1.120681 |
| 1 | 7.109494  | 0.807524  | -2.250517 |
| 6 | -3.119716 | 1.493892  | -5.503027 |

|   |           |           |           |
|---|-----------|-----------|-----------|
| 6 | -2.749245 | 2.461175  | -3.204469 |
| 6 | -1.464655 | 3.314952  | -5.167006 |
| 1 | -1.242423 | -2.005517 | -6.597564 |
| 1 | -2.919077 | -1.694756 | -7.123752 |
| 1 | -1.709070 | -0.379893 | -7.128506 |
| 1 | -4.023617 | 0.123972  | -4.101970 |
| 1 | -4.385981 | -0.239895 | -5.790282 |
| 1 | -3.080886 | -2.055073 | -3.371654 |
| 1 | -3.953622 | -2.472935 | -4.872598 |
| 1 | -2.305614 | -3.068481 | -4.614679 |
| 6 | -6.583645 | -1.339733 | 0.458964  |
| 6 | -5.700624 | 0.802140  | 1.336170  |
| 6 | -6.586490 | -0.896763 | 2.941728  |
| 1 | -6.867034 | -3.254694 | 1.406635  |
| 1 | -7.119011 | -3.281267 | -0.339776 |
| 1 | -3.575891 | -3.482918 | -1.361155 |
| 1 | -5.266788 | -3.694863 | -1.895795 |
| 1 | -4.636292 | -2.071335 | -1.490832 |
| 1 | -5.203744 | -5.026011 | 1.635774  |
| 1 | -5.784505 | -5.364406 | -0.016344 |
| 1 | -4.043758 | -5.305452 | 0.312655  |
| 6 | 2.089387  | 2.513330  | 5.635244  |
| 6 | -0.336231 | 2.507022  | 6.156089  |
| 6 | 0.452609  | 3.484698  | 3.994367  |

|   |           |           |           |
|---|-----------|-----------|-----------|
| 1 | 4.178892  | 2.220434  | 5.142782  |
| 1 | 3.141253  | 2.567019  | 3.751626  |
| 1 | 3.338473  | -1.385451 | 5.439551  |
| 1 | 4.404687  | -0.082999 | 6.033599  |
| 1 | 2.675719  | -0.118579 | 6.484983  |
| 1 | 3.856242  | 0.661023  | 2.381445  |
| 1 | 5.093453  | 0.511953  | 3.652475  |
| 1 | 4.164876  | -0.913401 | 3.162840  |
| 1 | 6.761944  | 3.683611  | 0.135233  |
| 1 | 7.044931  | 2.724761  | -1.314048 |
| 1 | 5.431127  | 3.671731  | -2.897468 |
| 1 | 5.580333  | 4.961631  | -1.674231 |
| 1 | 3.976772  | 4.462969  | -2.238903 |
| 1 | 3.107081  | 3.800927  | 0.051349  |
| 1 | 4.595782  | 4.594715  | 0.646243  |
| 1 | 4.157658  | 2.949829  | 1.188733  |
| 1 | -3.974348 | 2.188388  | -5.544645 |
| 1 | -2.689416 | 1.471727  | -6.517962 |
| 1 | -2.005987 | 2.830082  | -2.480478 |
| 1 | -3.484933 | 3.262538  | -3.383505 |
| 1 | -3.267288 | 1.611330  | -2.734405 |
| 1 | -0.849065 | 3.056788  | -6.041357 |
| 1 | -2.271921 | 3.985771  | -5.499253 |
| 1 | -0.841919 | 3.880530  | -4.459780 |

|   |           |           |           |
|---|-----------|-----------|-----------|
| 1 | -7.636553 | -1.019687 | 0.514172  |
| 1 | -6.187396 | -0.939368 | -0.488946 |
| 1 | -5.021189 | 0.987351  | 0.488777  |
| 1 | -6.693246 | 1.204980  | 1.080481  |
| 1 | -5.333051 | 1.366607  | 2.205660  |
| 1 | -6.035133 | -0.451018 | 3.782730  |
| 1 | -7.574025 | -0.412920 | 2.881291  |
| 1 | -6.733314 | -1.961406 | 3.171741  |
| 1 | 2.247470  | 3.572709  | 5.893034  |
| 1 | 2.132041  | 1.956546  | 6.585427  |
| 1 | -0.272324 | 1.658844  | 6.853930  |
| 1 | -0.135479 | 3.432304  | 6.718134  |
| 1 | -1.367829 | 2.567991  | 5.782360  |
| 1 | -0.545078 | 3.395598  | 3.538707  |
| 1 | 0.520101  | 4.469025  | 4.484084  |
| 1 | 1.186016  | 3.444581  | 3.175712  |
| 1 | 2.367144  | 0.686679  | 0.781564  |
| 6 | -0.556205 | 2.971290  | 0.514222  |
| 6 | -0.494658 | 4.126058  | -0.274680 |
| 6 | -1.792980 | 2.611317  | 1.078301  |
| 6 | -1.636736 | 4.893525  | -0.503804 |
| 1 | 0.458708  | 4.416126  | -0.719697 |
| 6 | -2.920930 | 3.385213  | 0.844339  |
| 1 | -1.855481 | 1.709720  | 1.690921  |

|   |           |          |           |
|---|-----------|----------|-----------|
| 6 | -2.874885 | 4.537476 | 0.042766  |
| 1 | -1.547145 | 5.778844 | -1.132609 |
| 1 | -3.865520 | 3.075731 | 1.294610  |
| 6 | -4.152106 | 5.350962 | -0.180621 |
| 6 | -3.943725 | 6.468654 | -1.206042 |
| 1 | -4.889765 | 7.006582 | -1.364037 |
| 1 | -3.197360 | 7.200495 | -0.864250 |
| 1 | -3.615746 | 6.065705 | -2.176361 |
| 6 | -5.271851 | 4.428183 | -0.689955 |
| 1 | -5.516608 | 3.640128 | 0.036519  |
| 1 | -6.187329 | 5.011649 | -0.871189 |
| 1 | -4.978917 | 3.940599 | -1.631279 |
| 6 | -4.578954 | 5.977909 | 1.157252  |
| 1 | -3.793870 | 6.644385 | 1.543664  |
| 1 | -5.501037 | 6.565162 | 1.026902  |
| 1 | -4.771084 | 5.204775 | 1.915521  |

---

**Table S22**

**[N-T/S]**

E : -3313.91011 Hartree

---

| Atomic<br>Number | Coordinates (Angstroms) |   |   |
|------------------|-------------------------|---|---|
|                  | X                       | Y | Z |

---

|   |           |           |           |
|---|-----------|-----------|-----------|
| 7 | 0.441452  | -0.486095 | -0.243793 |
| 6 | 1.134466  | 0.457726  | 0.291475  |
| 6 | 0.986695  | 1.843042  | -0.061175 |
| 6 | 0.901513  | -1.808375 | -0.190485 |
| 6 | 1.617866  | -2.325878 | -1.280673 |
| 6 | 0.617188  | -2.695669 | 0.862057  |
| 6 | 2.056910  | -1.544627 | -2.502007 |
| 6 | 2.029984  | -3.656831 | -1.331492 |
| 6 | -0.255022 | -2.435397 | 2.079670  |
| 6 | 1.077840  | -4.016078 | 0.832820  |
| 6 | 2.487754  | -2.683229 | -3.477176 |
| 6 | 3.144562  | -0.525591 | -2.164369 |
| 6 | 0.977806  | -0.630444 | -3.064557 |
| 6 | 2.723695  | -3.978224 | -2.646852 |
| 6 | 1.779877  | -4.518269 | -0.263257 |
| 6 | 0.003853  | -3.695364 | 2.964851  |
| 6 | -1.719316 | -2.253746 | 1.687334  |
| 6 | 0.015100  | -1.123715 | 2.801067  |
| 6 | 0.734625  | -4.769083 | 2.108104  |
| 1 | 3.368796  | -2.398592 | -4.070148 |
| 1 | 1.661076  | -2.854533 | -4.182837 |
| 6 | 2.793058  | 0.753774  | -2.619179 |
| 6 | 4.289475  | -0.690029 | -1.404276 |

|   |           |           |           |
|---|-----------|-----------|-----------|
| 6 | 1.437390  | 0.688557  | -3.185125 |
| 6 | -0.356493 | -0.919310 | -3.266191 |
| 6 | 4.215597  | -4.271624 | -2.437898 |
| 6 | 2.070381  | -5.187454 | -3.325669 |
| 1 | 2.118796  | -5.557660 | -0.285133 |
| 1 | -0.937890 | -4.075784 | 3.385392  |
| 1 | 0.638949  | -3.403988 | 3.813868  |
| 6 | -2.223880 | -1.032035 | 2.158957  |
| 6 | -2.545943 | -3.116051 | 0.993070  |
| 6 | -1.134252 | -0.320321 | 2.846134  |
| 6 | 1.204964  | -0.655956 | 3.325084  |
| 6 | -0.149911 | -5.990013 | 1.827218  |
| 6 | 2.018975  | -5.232090 | 2.809406  |
| 6 | 3.597384  | 1.842697  | -2.316413 |
| 6 | 5.116215  | 0.402310  | -1.088104 |
| 1 | 4.522125  | -1.675099 | -0.998760 |
| 6 | 0.572639  | 1.682262  | -3.623154 |
| 6 | -1.269777 | 0.099849  | -3.586226 |
| 1 | -0.718008 | -1.931312 | -3.062159 |
| 1 | 4.351022  | -5.120954 | -1.751080 |
| 1 | 4.692345  | -4.526413 | -3.396791 |
| 1 | 4.743642  | -3.405175 | -2.018751 |
| 1 | 2.224941  | -6.104217 | -2.736503 |
| 1 | 2.506639  | -5.350230 | -4.323450 |

|   |           |           |           |
|---|-----------|-----------|-----------|
| 1 | 0.987350  | -5.032801 | -3.439324 |
| 6 | -3.542181 | -0.682032 | 1.896765  |
| 6 | -3.902522 | -2.809496 | 0.775452  |
| 1 | -2.139442 | -4.056211 | 0.614077  |
| 6 | -1.072112 | 0.941485  | 3.418385  |
| 6 | 1.299076  | 0.640785  | 3.865795  |
| 1 | 2.095802  | -1.286783 | 3.263857  |
| 1 | 0.360727  | -6.696821 | 1.155813  |
| 1 | -0.383921 | -6.517944 | 2.764351  |
| 1 | -1.099012 | -5.700566 | 1.355534  |
| 1 | 2.565246  | -5.962693 | 2.193751  |
| 1 | 1.782113  | -5.707160 | 3.774215  |
| 1 | 2.686670  | -4.378326 | 2.997522  |
| 6 | 4.760628  | 1.690170  | -1.548172 |
| 1 | 3.274793  | 2.840913  | -2.617728 |
| 6 | 6.397602  | 0.138906  | -0.291410 |
| 6 | -0.784252 | 1.396901  | -3.855999 |
| 1 | 0.939521  | 2.704444  | -3.745277 |
| 6 | -2.763021 | -0.228070 | -3.495027 |
| 6 | -4.395840 | -1.555715 | 1.198145  |
| 1 | -3.922115 | 0.279974  | 2.250676  |
| 6 | -4.777547 | -3.886363 | 0.119358  |
| 6 | 0.136362  | 1.440962  | 3.934325  |
| 1 | -1.966971 | 1.567585  | 3.437964  |

|   |           |           |           |
|---|-----------|-----------|-----------|
| 6 | 2.666849  | 1.123413  | 4.362016  |
| 6 | 5.513676  | 2.958475  | -1.128134 |
| 6 | 6.871836  | 1.432292  | 0.386520  |
| 6 | 6.185596  | -0.913892 | 0.805148  |
| 6 | 7.471265  | -0.382632 | -1.263310 |
| 6 | -1.686096 | 2.522102  | -4.374360 |
| 6 | -3.167680 | -1.227395 | -4.588605 |
| 6 | -3.599379 | 1.055757  | -3.610650 |
| 6 | -3.055047 | -0.845194 | -2.117301 |
| 6 | -5.841354 | -1.113793 | 0.946033  |
| 6 | -6.262618 | -3.500683 | 0.203951  |
| 6 | -4.375156 | -4.089358 | -1.350746 |
| 6 | -4.598451 | -5.223025 | 0.858301  |
| 6 | 0.132215  | 2.865229  | 4.501571  |
| 6 | 2.661211  | 2.650120  | 4.528312  |
| 6 | 2.986022  | 0.437967  | 5.701743  |
| 6 | 3.775784  | 0.771755  | 3.358174  |
| 6 | 6.901790  | 2.612978  | -0.568467 |
| 6 | 5.709739  | 3.915068  | -2.312334 |
| 6 | 4.679526  | 3.672264  | -0.048020 |
| 1 | 7.871111  | 1.261596  | 0.819221  |
| 1 | 6.198912  | 1.652122  | 1.232737  |
| 1 | 5.326754  | -0.651672 | 1.439771  |
| 1 | 7.082688  | -0.966713 | 1.441184  |

|   |           |           |           |
|---|-----------|-----------|-----------|
| 1 | 6.016879  | -1.920003 | 0.396398  |
| 1 | 7.133604  | -1.318061 | -1.734189 |
| 1 | 8.412199  | -0.583851 | -0.726530 |
| 1 | 7.673902  | 0.335415  | -2.069985 |
| 6 | -3.082737 | 1.973329  | -4.703917 |
| 6 | -1.797430 | 3.624439  | -3.312751 |
| 6 | -1.093368 | 3.120697  | -5.658399 |
| 1 | -2.552418 | -2.137542 | -4.534879 |
| 1 | -4.222493 | -1.520898 | -4.465734 |
| 1 | -3.042136 | -0.799709 | -5.593817 |
| 1 | -3.571822 | 1.585757  | -2.642103 |
| 1 | -4.652412 | 0.781034  | -3.785876 |
| 1 | -2.688545 | -0.194210 | -1.308416 |
| 1 | -4.142930 | -0.973988 | -1.992168 |
| 1 | -2.585321 | -1.829771 | -1.983893 |
| 6 | -6.495755 | -2.031383 | -0.097651 |
| 6 | -5.889001 | 0.322523  | 0.401635  |
| 6 | -6.626477 | -1.160355 | 2.267783  |
| 1 | -6.639146 | -3.732322 | 1.213614  |
| 1 | -6.833284 | -4.137054 | -0.490952 |
| 1 | -3.297506 | -4.293815 | -1.440603 |
| 1 | -4.921726 | -4.946531 | -1.773496 |
| 1 | -4.597000 | -3.203407 | -1.960708 |
| 1 | -4.770924 | -5.100694 | 1.937823  |

|   |           |           |           |
|---|-----------|-----------|-----------|
| 1 | -5.321858 | -5.957913 | 0.472605  |
| 1 | -3.592502 | -5.643094 | 0.716760  |
| 6 | 1.432680  | 3.146562  | 5.268616  |
| 6 | -1.038475 | 3.069299  | 5.474669  |
| 6 | -0.018989 | 3.854461  | 3.334308  |
| 1 | 3.580770  | 2.952562  | 5.054439  |
| 1 | 2.706913  | 3.115133  | 3.528988  |
| 1 | 2.991549  | -0.655653 | 5.582863  |
| 1 | 3.978292  | 0.749842  | 6.063821  |
| 1 | 2.240598  | 0.681667  | 6.471809  |
| 1 | 3.541493  | 1.157453  | 2.352855  |
| 1 | 4.725271  | 1.226381  | 3.682552  |
| 1 | 3.942952  | -0.311798 | 3.283395  |
| 1 | 7.310082  | 3.504800  | -0.065660 |
| 1 | 7.583836  | 2.392700  | -1.405989 |
| 1 | 6.193631  | 3.402316  | -3.156831 |
| 1 | 6.351766  | 4.755178  | -2.004628 |
| 1 | 4.760520  | 4.340039  | -2.666478 |
| 1 | 3.659739  | 3.867935  | -0.410401 |
| 1 | 5.151938  | 4.628079  | 0.230362  |
| 1 | 4.581931  | 3.054014  | 0.856296  |
| 1 | -3.769610 | 2.819717  | -4.867490 |
| 1 | -3.036514 | 1.419364  | -5.656568 |
| 1 | -0.809647 | 4.044681  | -3.073128 |

|   |           |           |           |
|---|-----------|-----------|-----------|
| 1 | -2.440186 | 4.445837  | -3.671600 |
| 1 | -2.216081 | 3.229491  | -2.376773 |
| 1 | -0.942279 | 2.340454  | -6.418787 |
| 1 | -1.780753 | 3.876853  | -6.069634 |
| 1 | -0.126232 | 3.609643  | -5.475117 |
| 1 | -7.573712 | -1.808151 | -0.142287 |
| 1 | -6.085369 | -1.788618 | -1.092642 |
| 1 | -5.232083 | 0.433059  | -0.475507 |
| 1 | -6.917338 | 0.572337  | 0.097652  |
| 1 | -5.586734 | 1.060375  | 1.159748  |
| 1 | -6.165959 | -0.495814 | 3.013621  |
| 1 | -7.665646 | -0.831702 | 2.109160  |
| 1 | -6.642239 | -2.171958 | 2.696305  |
| 1 | 1.504083  | 4.229481  | 5.457870  |
| 1 | 1.378157  | 2.662925  | 6.257809  |
| 1 | -1.028712 | 2.307324  | 6.268007  |
| 1 | -0.953761 | 4.060350  | 5.946951  |
| 1 | -2.013714 | 3.027555  | 4.969656  |
| 1 | -0.939216 | 3.647147  | 2.765054  |
| 1 | -0.068856 | 4.889083  | 3.709115  |
| 1 | 0.820876  | 3.777345  | 2.628537  |
| 1 | 2.011991  | 0.229799  | 0.925986  |
| 6 | -0.279704 | 2.495534  | 0.059598  |
| 6 | -0.326212 | 3.895152  | -0.122601 |

|   |           |          |           |
|---|-----------|----------|-----------|
| 6 | -1.499308 | 1.815397 | 0.300758  |
| 6 | -1.519907 | 4.597042 | -0.024021 |
| 1 | 0.615556  | 4.407610 | -0.328614 |
| 6 | -2.694040 | 2.511352 | 0.329982  |
| 1 | -1.483597 | 0.732144 | 0.421552  |
| 6 | -2.729011 | 3.913104 | 0.182129  |
| 1 | -1.510539 | 5.678514 | -0.147155 |
| 1 | -3.621173 | 1.954803 | 0.474286  |
| 6 | -4.080210 | 4.622575 | 0.226859  |
| 6 | -3.950685 | 6.128960 | -0.011952 |
| 1 | -4.948249 | 6.590769 | 0.008505  |
| 1 | -3.339836 | 6.612052 | 0.764494  |
| 1 | -3.501103 | 6.343383 | -0.992608 |
| 6 | -4.987272 | 4.027142 | -0.865130 |
| 1 | -5.169530 | 2.954600 | -0.705719 |
| 1 | -5.960633 | 4.540149 | -0.863633 |
| 1 | -4.533647 | 4.150250 | -1.860219 |
| 6 | -4.711040 | 4.390051 | 1.610485  |
| 1 | -4.067409 | 4.795158 | 2.405780  |
| 1 | -5.690303 | 4.889007 | 1.667622  |
| 1 | -4.862611 | 3.319100 | 1.808738  |

---

**Table S23**

[P-T/S]

E : -3600.448747 Hartree

---

| Atomic | Coordinates (Angstroms) |           |           |
|--------|-------------------------|-----------|-----------|
| Number | X                       | Y         | Z         |
| 15     | -0.026622               | 0.130940  | 0.219375  |
| 6      | -0.128805               | 0.168205  | 2.032357  |
| 6      | 1.065654                | -0.169583 | 2.424458  |
| 6      | -1.728721               | -0.600098 | -0.021386 |
| 6      | -2.031451               | -1.970261 | -0.006684 |
| 6      | -2.813956               | 0.285391  | -0.201959 |
| 6      | -1.063918               | -3.134330 | 0.132363  |
| 6      | -3.347258               | -2.435731 | -0.144848 |
| 6      | -2.764194               | 1.792202  | -0.465038 |
| 6      | -4.130412               | -0.179133 | -0.294283 |
| 6      | -1.937505               | -4.347237 | -0.326430 |
| 6      | -0.465856               | -3.312556 | 1.527222  |
| 6      | 0.199504                | -3.037891 | -0.703429 |
| 6      | -3.426602               | -3.953383 | -0.166485 |
| 6      | -4.409491               | -1.544941 | -0.264540 |
| 6      | -4.259610               | 2.217338  | -0.357364 |
| 6      | -2.134602               | 2.060706  | -1.833890 |
| 6      | -1.858105               | 2.620835  | 0.438567  |

---

|   |           |           |           |
|---|-----------|-----------|-----------|
| 6 | -5.146439 | 0.943194  | -0.422102 |
| 1 | -1.676398 | -5.264918 | 0.219553  |
| 1 | -1.728039 | -4.524637 | -1.391838 |
| 6 | 0.910633  | -3.590332 | 1.439334  |
| 6 | -1.050720 | -3.167838 | 2.769816  |
| 6 | 1.327226  | -3.413428 | 0.039356  |
| 6 | 0.339752  | -2.571676 | -1.994257 |
| 6 | -4.033441 | -4.502780 | 1.132378  |
| 6 | -4.256674 | -4.450678 | -1.354475 |
| 1 | -5.437427 | -1.908920 | -0.354185 |
| 1 | -4.518439 | 2.947599  | -1.137595 |
| 1 | -4.406603 | 2.717954  | 0.610604  |
| 6 | -1.047358 | 2.940521  | -1.724255 |
| 6 | -2.489875 | 1.567222  | -3.075832 |
| 6 | -0.866543 | 3.277946  | -0.306803 |
| 6 | -1.897236 | 2.775018  | 1.812608  |
| 6 | -5.940256 | 0.852934  | -1.731743 |
| 6 | -6.127473 | 0.903400  | 0.757814  |
| 6 | 1.650563  | -3.807805 | 2.591581  |
| 6 | -0.301332 | -3.332746 | 3.951975  |
| 1 | -2.097762 | -2.864478 | 2.836142  |
| 6 | 2.581008  | -3.386701 | -0.557068 |
| 6 | 1.615247  | -2.418293 | -2.566139 |
| 1 | -0.546972 | -2.230169 | -2.535731 |

|   |           |           |           |
|---|-----------|-----------|-----------|
| 1 | -5.042927 | -4.094612 | 1.292911  |
| 1 | -4.111121 | -5.599592 | 1.081273  |
| 1 | -3.416679 | -4.249865 | 2.004129  |
| 1 | -5.316134 | -4.173624 | -1.243203 |
| 1 | -4.203155 | -5.547946 | -1.425999 |
| 1 | -3.886541 | -4.023018 | -2.297809 |
| 6 | -0.336055 | 3.311985  | -2.855922 |
| 6 | -1.817595 | 1.978214  | -4.243375 |
| 1 | -3.306874 | 0.846573  | -3.152747 |
| 6 | 0.103215  | 4.028022  | 0.335886  |
| 6 | -0.905888 | 3.514558  | 2.487555  |
| 1 | -2.687655 | 2.280710  | 2.384522  |
| 1 | -6.478511 | -0.104516 | -1.800819 |
| 1 | -6.682080 | 1.664522  | -1.783343 |
| 1 | -5.284846 | 0.940568  | -2.608564 |
| 1 | -6.739222 | -0.011483 | 0.734201  |
| 1 | -6.807971 | 1.768185  | 0.721459  |
| 1 | -5.586927 | 0.925624  | 1.715739  |
| 6 | 1.056196  | -3.702444 | 3.861706  |
| 1 | 2.719092  | -4.019015 | 2.513707  |
| 6 | -1.018123 | -3.084354 | 5.283836  |
| 6 | 2.744649  | -2.880969 | -1.858356 |
| 1 | 3.457884  | -3.697471 | 0.016180  |
| 6 | 1.695933  | -1.675559 | -3.902685 |

|   |           |           |           |
|---|-----------|-----------|-----------|
| 6 | -0.708067 | 2.844285  | -4.127489 |
| 1 | 0.517750  | 3.984616  | -2.754484 |
| 6 | -2.344039 | 1.457900  | -5.587637 |
| 6 | 0.110124  | 4.146932  | 1.735703  |
| 1 | 0.885367  | 4.509145  | -0.253052 |
| 6 | -1.007664 | 3.646406  | 4.012820  |
| 6 | 1.933770  | -3.930666 | 5.096381  |
| 6 | -0.018912 | -3.061176 | 6.451965  |
| 6 | -1.728804 | -1.721555 | 5.254388  |
| 6 | -2.059210 | -4.192363 | 5.513323  |
| 6 | 4.161003  | -2.768037 | -2.426936 |
| 6 | 1.005330  | -2.505736 | -4.996341 |
| 6 | 3.155500  | -1.401671 | -4.306519 |
| 6 | 0.987108  | -0.317929 | -3.763955 |
| 6 | 0.089684  | 3.332819  | -5.341382 |
| 6 | -1.700725 | 2.224105  | -6.754481 |
| 6 | -2.045690 | -0.044521 | -5.723053 |
| 6 | -3.864986 | 1.662731  | -5.677443 |
| 6 | 1.274277  | 4.904087  | 2.383175  |
| 6 | 0.321837  | 4.138795  | 4.604619  |
| 6 | -2.133987 | 4.643917  | 4.335567  |
| 6 | -1.328131 | 2.303617  | 4.684360  |
| 6 | 1.045195  | -4.137161 | 6.331038  |
| 6 | 2.809841  | -5.180473 | 4.929159  |

|   |           |           |           |
|---|-----------|-----------|-----------|
| 6 | 2.851593  | -2.712897 | 5.293169  |
| 1 | -0.577193 | -3.166902 | 7.395838  |
| 1 | 0.465478  | -2.072306 | 6.490653  |
| 1 | -1.018591 | -0.926561 | 4.978731  |
| 1 | -2.135843 | -1.491607 | 6.251593  |
| 1 | -2.564974 | -1.699030 | 4.540832  |
| 1 | -2.771984 | -4.241525 | 4.676944  |
| 1 | -2.626599 | -3.998870 | 6.437061  |
| 1 | -1.580272 | -5.178421 | 5.599704  |
| 6 | 4.087401  | -2.544018 | -3.944292 |
| 6 | 4.877322  | -1.592868 | -1.737561 |
| 6 | 4.966776  | -4.050463 | -2.177841 |
| 1 | -0.038788 | -2.726246 | -4.730029 |
| 1 | 1.005071  | -1.953676 | -5.949463 |
| 1 | 1.521038  | -3.464971 | -5.152336 |
| 1 | 3.501653  | -0.480410 | -3.811746 |
| 1 | 3.190630  | -1.197276 | -5.388539 |
| 1 | 1.433445  | 0.276959  | -2.951467 |
| 1 | 1.086233  | 0.249829  | -4.703130 |
| 1 | -0.087160 | -0.414768 | -3.550419 |
| 6 | -0.211496 | 2.445394  | -6.557727 |
| 6 | 1.602615  | 3.280519  | -5.078589 |
| 6 | -0.297716 | 4.793075  | -5.634484 |
| 1 | -2.203790 | 3.198259  | -6.865593 |

|   |           |           |           |
|---|-----------|-----------|-----------|
| 1 | -1.891900 | 1.670632  | -7.687683 |
| 1 | -2.445835 | -0.603876 | -4.863042 |
| 1 | -2.513072 | -0.442530 | -6.637196 |
| 1 | -0.966386 | -0.241121 | -5.773186 |
| 1 | -4.131934 | 2.709509  | -5.469111 |
| 1 | -4.212596 | 1.411598  | -6.691572 |
| 1 | -4.413527 | 1.021892  | -4.972609 |
| 6 | 0.921878  | 5.293950  | 3.825451  |
| 6 | 1.610177  | 6.194880  | 1.622375  |
| 6 | 2.508567  | 3.984374  | 2.360029  |
| 1 | 0.157190  | 4.422382  | 5.656521  |
| 1 | 1.035420  | 3.298078  | 4.618446  |
| 1 | -3.091781 | 4.287498  | 3.928494  |
| 1 | -2.243520 | 4.762058  | 5.425067  |
| 1 | -1.935584 | 5.630880  | 3.894316  |
| 1 | -0.558494 | 1.555766  | 4.440357  |
| 1 | -1.341041 | 2.433923  | 5.777647  |
| 1 | -2.308809 | 1.901687  | 4.391991  |
| 1 | 1.682422  | -4.154990 | 7.229737  |
| 1 | 0.567929  | -5.129721 | 6.264918  |
| 1 | 2.201476  | -6.060563 | 4.673503  |
| 1 | 3.337929  | -5.387476 | 5.872808  |
| 1 | 3.573642  | -5.050659 | 4.149611  |
| 1 | 3.486904  | -2.556274 | 4.408283  |

|   |           |           |           |
|---|-----------|-----------|-----------|
| 1 | 3.505555  | -2.861757 | 6.167924  |
| 1 | 2.277053  | -1.787657 | 5.437725  |
| 1 | 5.102698  | -2.352723 | -4.327226 |
| 1 | 3.739607  | -3.476322 | -4.421683 |
| 1 | 4.974722  | -1.784502 | -0.658655 |
| 1 | 5.887191  | -1.453985 | -2.155399 |
| 1 | 4.318646  | -0.652448 | -1.843611 |
| 1 | 4.442175  | -4.930230 | -2.578321 |
| 1 | 5.944407  | -3.973889 | -2.678169 |
| 1 | 5.158902  | -4.222576 | -1.109432 |
| 1 | 0.233753  | 2.906987  | -7.453677 |
| 1 | 0.294249  | 1.473547  | -6.425212 |
| 1 | 1.913310  | 2.284042  | -4.733790 |
| 1 | 2.144593  | 3.508925  | -6.009220 |
| 1 | 1.920376  | 4.016289  | -4.326875 |
| 1 | -0.069581 | 5.430123  | -4.767238 |
| 1 | 0.268635  | 5.173158  | -6.499303 |
| 1 | -1.371053 | 4.898222  | -5.844967 |
| 1 | 1.831294  | 5.664858  | 4.324842  |
| 1 | 0.212800  | 6.138217  | 3.804569  |
| 1 | 0.718197  | 6.827103  | 1.500321  |
| 1 | 2.362469  | 6.765862  | 2.187954  |
| 1 | 2.033149  | 5.998490  | 0.627767  |
| 1 | 2.776648  | 3.727650  | 1.324451  |

|   |           |           |          |
|---|-----------|-----------|----------|
| 1 | 3.372501  | 4.482229  | 2.828686 |
| 1 | 2.321726  | 3.036841  | 2.883525 |
| 1 | -1.069805 | 0.219137  | 2.599073 |
| 6 | 2.440167  | -0.280833 | 2.708563 |
| 6 | 2.988440  | 0.468628  | 3.772507 |
| 6 | 3.314714  | -1.105741 | 1.965800 |
| 6 | 4.336363  | 0.362852  | 4.098457 |
| 1 | 2.334633  | 1.112932  | 4.363241 |
| 6 | 4.651927  | -1.197495 | 2.311468 |
| 1 | 2.920790  | -1.641902 | 1.104305 |
| 6 | 5.200486  | -0.478743 | 3.388432 |
| 1 | 4.709730  | 0.950836  | 4.936587 |
| 1 | 5.296981  | -1.849024 | 1.716085 |
| 6 | 6.684058  | -0.631779 | 3.723324 |
| 6 | 7.079702  | 0.194278  | 4.949987 |
| 1 | 8.149052  | 0.051468  | 5.163309 |
| 1 | 6.910838  | 1.268576  | 4.785561 |
| 1 | 6.513116  | -0.112900 | 5.841751 |
| 6 | 6.987145  | -2.110971 | 4.016140 |
| 1 | 6.765788  | -2.749373 | 3.148786 |
| 1 | 8.051279  | -2.240510 | 4.267039 |
| 1 | 6.384181  | -2.470415 | 4.863602 |
| 6 | 7.520931  | -0.159985 | 2.521975 |
| 1 | 7.316130  | 0.897785  | 2.299795 |

|   |          |           |          |
|---|----------|-----------|----------|
| 1 | 8.595420 | -0.268521 | 2.736232 |
| 1 | 7.294221 | -0.744131 | 1.618217 |

---

**Table S24**

**[As-T/S]**

E : -5494.842741 Hartree

---

| Atomic | Coordinates (Angstroms) |           |           |
|--------|-------------------------|-----------|-----------|
| Number | X                       | Y         | Z         |
| 33     | -0.018765               | 0.133556  | 0.159383  |
| 6      | -0.097157               | 0.223319  | 2.118061  |
| 6      | 1.095527                | -0.151630 | 2.437661  |
| 6      | -1.836937               | -0.666785 | 0.002469  |
| 6      | -2.133185               | -2.036463 | 0.080763  |
| 6      | -2.931635               | 0.207971  | -0.174983 |
| 6      | -1.162845               | -3.196543 | 0.243391  |
| 6      | -3.451245               | -2.511884 | 0.003647  |
| 6      | -2.907261               | 1.706331  | -0.501317 |
| 6      | -4.248420               | -0.266631 | -0.206396 |
| 6      | -2.044174               | -4.428794 | -0.141010 |
| 6      | -0.544754               | -3.318646 | 1.633475  |
| 6      | 0.085708                | -3.140909 | -0.615680 |

|   |           |           |           |
|---|-----------|-----------|-----------|
| 6 | -3.529341 | -4.028939 | 0.034758  |
| 6 | -4.520430 | -1.630207 | -0.113032 |
| 6 | -4.403451 | 2.121866  | -0.370346 |
| 6 | -2.319313 | 1.927728  | -1.896487 |
| 6 | -1.989175 | 2.582230  | 0.343068  |
| 6 | -5.278141 | 0.839648  | -0.354926 |
| 1 | -1.768903 | -5.320330 | 0.440282  |
| 1 | -1.859398 | -4.655625 | -1.201493 |
| 6 | 0.828734  | -3.606863 | 1.538874  |
| 6 | -1.117587 | -3.126088 | 2.874307  |
| 6 | 1.225081  | -3.483776 | 0.125595  |
| 6 | 0.202318  | -2.734809 | -1.929441 |
| 6 | -4.115496 | -4.535032 | 1.359884  |
| 6 | -4.378563 | -4.562896 | -1.123811 |
| 1 | -5.549619 | -2.000018 | -0.152693 |
| 1 | -4.690134 | 2.813331  | -1.175455 |
| 1 | -4.529771 | 2.664568  | 0.577605  |
| 6 | -1.242088 | 2.826426  | -1.852957 |
| 6 | -2.697710 | 1.374490  | -3.106559 |
| 6 | -1.026231 | 3.220076  | -0.454116 |
| 6 | -1.992061 | 2.784897  | 1.712561  |
| 6 | -6.103519 | 0.683487  | -1.638312 |
| 6 | -6.228794 | 0.843077  | 0.849472  |
| 6 | 1.577019  | -3.791023 | 2.692570  |

|   |           |           |           |
|---|-----------|-----------|-----------|
| 6 | -0.360358 | -3.260437 | 4.054772  |
| 1 | -2.162283 | -2.814259 | 2.936889  |
| 6 | 2.468902  | -3.474122 | -0.492397 |
| 6 | 1.467130  | -2.597983 | -2.527807 |
| 1 | -0.696025 | -2.426069 | -2.471766 |
| 1 | -5.125521 | -4.126764 | 1.517068  |
| 1 | -4.186934 | -5.633554 | 1.350598  |
| 1 | -3.490363 | -4.246075 | 2.214544  |
| 1 | -5.436413 | -4.283899 | -1.003735 |
| 1 | -4.323300 | -5.661776 | -1.163876 |
| 1 | -4.025891 | -4.161353 | -2.085281 |
| 6 | -0.561584 | 3.152137  | -3.017270 |
| 6 | -2.057023 | 1.737043  | -4.307329 |
| 1 | -3.508199 | 0.642843  | -3.130494 |
| 6 | -0.025430 | 3.971883  | 0.137794  |
| 6 | -0.976103 | 3.535807  | 2.334250  |
| 1 | -2.768551 | 2.312755  | 2.320058  |
| 1 | -6.641926 | -0.276422 | -1.645341 |
| 1 | -6.847055 | 1.491676  | -1.712561 |
| 1 | -5.470130 | 0.726409  | -2.534372 |
| 1 | -6.827064 | -0.080258 | 0.883103  |
| 1 | -6.922289 | 1.696272  | 0.790812  |
| 1 | -5.663861 | 0.917232  | 1.790427  |
| 6 | 0.993660  | -3.642650 | 3.964161  |

|   |           |           |           |
|---|-----------|-----------|-----------|
| 1 | 2.643939  | -4.010448 | 2.614235  |
| 6 | -1.068384 | -2.973954 | 5.383407  |
| 6 | 2.609877  | -3.017488 | -1.814509 |
| 1 | 3.357393  | -3.754469 | 0.078622  |
| 6 | 1.521305  | -1.921716 | -3.901841 |
| 6 | -0.954505 | 2.618461  | -4.257014 |
| 1 | 0.285233  | 3.839742  | -2.968590 |
| 6 | -2.611141 | 1.153871  | -5.614511 |
| 6 | 0.037958  | 4.112261  | 1.533468  |
| 1 | 0.749883  | 4.417032  | -0.487679 |
| 6 | -1.032074 | 3.756927  | 3.851925  |
| 6 | 1.877546  | -3.843518 | 5.199806  |
| 6 | -0.060671 | -2.916828 | 6.542512  |
| 6 | -1.781993 | -1.614006 | 5.319215  |
| 6 | -2.108167 | -4.075474 | 5.649213  |
| 6 | 4.017649  | -2.893293 | -2.400650 |
| 6 | 0.814573  | -2.808905 | -4.939409 |
| 6 | 2.971583  | -1.661114 | -4.349221 |
| 6 | 0.806413  | -0.562286 | -3.820540 |
| 6 | -0.185538 | 3.052783  | -5.509634 |
| 6 | -2.003668 | 1.874757  | -6.828631 |
| 6 | -2.303547 | -0.350895 | -5.695461 |
| 6 | -4.136097 | 1.340609  | -5.673889 |
| 6 | 1.282396  | 4.786299  | 2.122133  |

|   |           |           |           |
|---|-----------|-----------|-----------|
| 6 | 0.365586  | 4.100401  | 4.388034  |
| 6 | -2.011078 | 4.912096  | 4.130055  |
| 6 | -1.517889 | 2.517906  | 4.614903  |
| 6 | 0.997826  | -4.000947 | 6.448465  |
| 6 | 2.733283  | -5.110840 | 5.063922  |
| 6 | 2.813163  | -2.633273 | 5.356963  |
| 1 | -0.612337 | -2.989969 | 7.493460  |
| 1 | 0.427692  | -1.929147 | 6.545223  |
| 1 | -1.074334 | -0.825648 | 5.019663  |
| 1 | -2.187205 | -1.357865 | 6.310604  |
| 1 | -2.619949 | -1.612677 | 4.607503  |
| 1 | -2.828374 | -4.143363 | 4.820401  |
| 1 | -2.667744 | -3.858945 | 6.572516  |
| 1 | -1.630426 | -5.060112 | 5.754867  |
| 6 | 3.924452  | -2.765306 | -3.927897 |
| 6 | 4.690104  | -1.651173 | -1.788371 |
| 6 | 4.873593  | -4.126374 | -2.082651 |
| 1 | -0.220555 | -3.026677 | -4.638282 |
| 1 | 0.785296  | -2.301739 | -5.916845 |
| 1 | 1.336639  | -3.769382 | -5.063097 |
| 1 | 3.316925  | -0.705213 | -3.925229 |
| 1 | 2.985685  | -1.530346 | -5.443057 |
| 1 | 1.264997  | 0.076276  | -3.048973 |
| 1 | 0.885943  | -0.042514 | -4.789096 |

|   |           |           |           |
|---|-----------|-----------|-----------|
| 1 | -0.263312 | -0.653348 | -3.582197 |
| 6 | -0.511186 | 2.110570  | -6.677948 |
| 6 | 1.332625  | 3.011407  | -5.278122 |
| 6 | -0.581776 | 4.497179  | -5.862417 |
| 1 | -2.515345 | 2.840869  | -6.967090 |
| 1 | -2.214943 | 1.282380  | -7.733097 |
| 1 | -2.673976 | -0.876310 | -4.801630 |
| 1 | -2.794901 | -0.789143 | -6.578166 |
| 1 | -1.224596 | -0.542648 | -5.769644 |
| 1 | -4.409949 | 2.391558  | -5.498557 |
| 1 | -4.506065 | 1.047824  | -6.668797 |
| 1 | -4.659246 | 0.720395  | -4.932214 |
| 6 | 1.050986  | 5.189981  | 3.584882  |
| 6 | 1.676047  | 6.050635  | 1.346270  |
| 6 | 2.434576  | 3.767838  | 2.030123  |
| 1 | 0.276773  | 4.397808  | 5.445382  |
| 1 | 0.981719  | 3.185283  | 4.371540  |
| 1 | -3.017644 | 4.653261  | 3.769910  |
| 1 | -2.070451 | 5.113508  | 5.211517  |
| 1 | -1.706725 | 5.835211  | 3.617617  |
| 1 | -0.869819 | 1.652844  | 4.412858  |
| 1 | -1.481293 | 2.720071  | 5.696446  |
| 1 | -2.554539 | 2.245562  | 4.371496  |
| 1 | 1.643545  | -3.988746 | 7.341272  |

|   |           |           |           |
|---|-----------|-----------|-----------|
| 1 | 0.515596  | -4.992945 | 6.423924  |
| 1 | 2.107287  | -5.988714 | 4.845989  |
| 1 | 3.270606  | -5.294749 | 6.007134  |
| 1 | 3.487618  | -5.019471 | 4.270003  |
| 1 | 3.456420  | -2.516826 | 4.471415  |
| 1 | 3.459770  | -2.761280 | 6.240433  |
| 1 | 2.251402  | -1.695358 | 5.467138  |
| 1 | 4.931975  | -2.581773 | -4.334791 |
| 1 | 3.586846  | -3.731002 | -4.342138 |
| 1 | 4.810936  | -1.778003 | -0.702096 |
| 1 | 5.686360  | -1.488080 | -2.229788 |
| 1 | 4.086282  | -0.744748 | -1.935534 |
| 1 | 4.380705  | -5.048000 | -2.425414 |
| 1 | 5.844388  | -4.042441 | -2.595018 |
| 1 | 5.079931  | -4.226678 | -1.007878 |
| 1 | -0.088408 | 2.532442  | -7.603822 |
| 1 | 0.001130  | 1.147205  | -6.513069 |
| 1 | 1.651453  | 2.026649  | -4.907805 |
| 1 | 1.853818  | 3.209386  | -6.227494 |
| 1 | 1.665673  | 3.771321  | -4.557792 |
| 1 | -0.333661 | 5.175833  | -5.033102 |
| 1 | -0.037563 | 4.835673  | -6.758319 |
| 1 | -1.660125 | 4.591304  | -6.052153 |
| 1 | 2.022517  | 5.447328  | 4.036678  |

|   |           |           |          |
|---|-----------|-----------|----------|
| 1 | 0.444308  | 6.109828  | 3.613705 |
| 1 | 0.830934  | 6.751452  | 1.277304 |
| 1 | 2.502503  | 6.556902  | 1.868466 |
| 1 | 2.024023  | 5.828336  | 0.328359 |
| 1 | 2.629754  | 3.501085  | 0.980838 |
| 1 | 3.359021  | 4.185052  | 2.460484 |
| 1 | 2.192033  | 2.833796  | 2.555996 |
| 1 | -1.027485 | 0.328737  | 2.689353 |
| 6 | 2.473157  | -0.304698 | 2.705999 |
| 6 | 3.076195  | 0.472378  | 3.717934 |
| 6 | 3.300905  | -1.183901 | 1.974567 |
| 6 | 4.434462  | 0.351760  | 3.995174 |
| 1 | 2.462026  | 1.160179  | 4.301277 |
| 6 | 4.648335  | -1.294051 | 2.271714 |
| 1 | 2.862937  | -1.745578 | 1.152599 |
| 6 | 5.254883  | -0.536486 | 3.289250 |
| 1 | 4.852104  | 0.969858  | 4.789658 |
| 1 | 5.253038  | -1.985397 | 1.678433 |
| 6 | 6.753425  | -0.685506 | 3.556948 |
| 6 | 7.208460  | 0.171256  | 4.741423 |
| 1 | 8.284992  | 0.024681  | 4.911617 |
| 1 | 7.041769  | 1.241924  | 4.552284 |
| 1 | 6.679183  | -0.105122 | 5.665410 |
| 6 | 7.078174  | -2.156610 | 3.866082 |

|   |          |           |          |
|---|----------|-----------|----------|
| 1 | 6.814614 | -2.815604 | 3.026321 |
| 1 | 8.155776 | -2.274098 | 4.059173 |
| 1 | 6.526388 | -2.500835 | 4.753740 |
| 6 | 7.532468 | -0.241563 | 2.306820 |
| 1 | 7.317647 | 0.811096  | 2.070803 |
| 1 | 8.615774 | -0.347162 | 2.474378 |
| 1 | 7.263327 | -0.845770 | 1.428286 |

-----

**Table S25**

**[Sb-T/S]**

E : -3499.395829 Hartree

-----

| Atomic<br>Number | Coordinates (Angstroms) |           |           |
|------------------|-------------------------|-----------|-----------|
|                  | X                       | Y         | Z         |
| 51               | -0.019747               | 0.122331  | 0.082644  |
| 6                | -0.023495               | 0.258827  | 2.293554  |
| 6                | 1.174937                | -0.142325 | 2.473352  |
| 6                | -2.039095               | -0.794365 | 0.070203  |
| 6                | -2.308256               | -2.164204 | 0.218091  |
| 6                | -3.162508               | 0.052426  | -0.065675 |
| 6                | -1.314912               | -3.304436 | 0.395426  |
| 6                | -3.618852               | -2.668718 | 0.233434  |

|   |           |           |           |
|---|-----------|-----------|-----------|
| 6 | -3.198325 | 1.546398  | -0.423005 |
| 6 | -4.470355 | -0.448947 | -0.016341 |
| 6 | -2.188015 | -4.564681 | 0.093796  |
| 6 | -0.661256 | -3.351547 | 1.774192  |
| 6 | -0.088978 | -3.286078 | -0.496971 |
| 6 | -3.669223 | -4.184301 | 0.327249  |
| 6 | -4.709222 | -1.812957 | 0.136301  |
| 6 | -4.699801 | 1.924656  | -0.244433 |
| 6 | -2.667053 | 1.764758  | -1.839132 |
| 6 | -2.293741 | 2.477549  | 0.372755  |
| 6 | -5.535529 | 0.621699  | -0.165473 |
| 1 | -1.867965 | -5.432510 | 0.687716  |
| 1 | -2.049991 | -4.820446 | -0.967767 |
| 6 | 0.710102  | -3.642375 | 1.660238  |
| 6 | -1.202552 | -3.095875 | 3.018161  |
| 6 | 1.070411  | -3.585662 | 0.233095  |
| 6 | -0.006193 | -2.952193 | -1.833864 |
| 6 | -4.180897 | -4.651392 | 1.696933  |
| 6 | -4.565051 | -4.776729 | -0.766292 |
| 1 | -5.731234 | -2.202732 | 0.157383  |
| 1 | -5.036695 | 2.588981  | -1.053051 |
| 1 | -4.806113 | 2.484471  | 0.695686  |
| 6 | -1.640846 | 2.723342  | -1.851019 |
| 6 | -3.046203 | 1.153581  | -3.020362 |

|   |           |           |           |
|---|-----------|-----------|-----------|
| 6 | -1.403205 | 3.160333  | -0.467600 |
| 6 | -2.256103 | 2.693677  | 1.740647  |
| 6 | -6.386174 | 0.404967  | -1.423420 |
| 6 | -6.456659 | 0.638181  | 1.061128  |
| 6 | 1.484779  | -3.779678 | 2.803196  |
| 6 | -0.418623 | -3.183137 | 4.186040  |
| 1 | -2.245363 | -2.778598 | 3.090857  |
| 6 | 2.298268  | -3.602817 | -0.414426 |
| 6 | 1.243632  | -2.842739 | -2.469993 |
| 1 | -0.919701 | -2.678285 | -2.369742 |
| 1 | -5.184461 | -4.245040 | 1.895638  |
| 1 | -4.244532 | -5.749939 | 1.722936  |
| 1 | -3.513278 | -4.334200 | 2.507974  |
| 1 | -5.620354 | -4.509823 | -0.603298 |
| 1 | -4.493664 | -5.875407 | -0.766803 |
| 1 | -4.266983 | -4.408914 | -1.759122 |
| 6 | -0.999960 | 3.036924  | -3.041117 |
| 6 | -2.452520 | 1.506759  | -4.247772 |
| 1 | -3.818981 | 0.381976  | -2.999991 |
| 6 | -0.409581 | 3.956951  | 0.080146  |
| 6 | -1.260503 | 3.503889  | 2.314026  |
| 1 | -2.984117 | 2.187456  | 2.379377  |
| 1 | -6.893304 | -0.571091 | -1.391787 |
| 1 | -7.157094 | 1.186923  | -1.501598 |

|   |           |           |           |
|---|-----------|-----------|-----------|
| 1 | -5.774810 | 0.443918  | -2.334977 |
| 1 | -7.035810 | -0.294983 | 1.134609  |
| 1 | -7.168862 | 1.475188  | 0.994975  |
| 1 | -5.871556 | 0.750542  | 1.985959  |
| 6 | 0.930855  | -3.578360 | 4.080786  |
| 1 | 2.547967  | -4.011364 | 2.710293  |
| 6 | -1.094877 | -2.839179 | 5.518274  |
| 6 | 2.405010  | -3.218505 | -1.762424 |
| 1 | 3.201041  | -3.854674 | 0.146459  |
| 6 | 1.264356  | -2.244660 | -3.881102 |
| 6 | -1.389223 | 2.435781  | -4.251476 |
| 1 | -0.183234 | 3.761596  | -3.036057 |
| 6 | -3.020304 | 0.870064  | -5.523693 |
| 6 | -0.292679 | 4.102394  | 1.470883  |
| 1 | 0.326989  | 4.421282  | -0.577224 |
| 6 | -1.290881 | 3.788400  | 3.820543  |
| 6 | 1.837866  | -3.747934 | 5.304440  |
| 6 | -0.063295 | -2.759934 | 6.655102  |
| 6 | -1.786132 | -1.470063 | 5.421379  |
| 6 | -2.146834 | -3.913014 | 5.843245  |
| 6 | 3.797751  | -3.134511 | -2.389960 |
| 6 | 0.530490  | -3.186615 | -4.849250 |
| 6 | 2.703755  | -2.012775 | -4.377643 |
| 6 | 0.556190  | -0.878814 | -3.860985 |

|   |           |           |           |
|---|-----------|-----------|-----------|
| 6 | -0.645032 | 2.835887  | -5.529922 |
| 6 | -2.461171 | 1.573585  | -6.770379 |
| 6 | -2.677019 | -0.627928 | -5.571685 |
| 6 | -4.550386 | 1.018640  | -5.547844 |
| 6 | 0.969971  | 4.783305  | 2.013357  |
| 6 | 0.125164  | 4.113163  | 4.317757  |
| 6 | -2.232376 | 4.986608  | 4.047079  |
| 6 | -1.812705 | 2.609222  | 4.649121  |
| 6 | 0.978927  | -3.860416 | 6.572145  |
| 6 | 2.678542  | -5.027916 | 5.193025  |
| 6 | 2.789060  | -2.543790 | 5.408225  |
| 1 | -0.595505 | -2.796916 | 7.619131  |
| 1 | 0.438814  | -1.779921 | 6.618465  |
| 1 | -1.063852 | -0.702881 | 5.103475  |
| 1 | -2.184985 | -1.181602 | 6.406552  |
| 1 | -2.624188 | -1.470969 | 4.709554  |
| 1 | -2.887074 | -3.996521 | 5.033779  |
| 1 | -2.681938 | -3.656466 | 6.770821  |
| 1 | -1.683281 | -4.901794 | 5.971589  |
| 6 | 3.665993  | -3.093131 | -3.919062 |
| 6 | 4.494299  | -1.866357 | -1.864628 |
| 6 | 4.655182  | -4.353998 | -2.025696 |
| 1 | -0.495463 | -3.388392 | -4.508339 |
| 1 | 0.473726  | -2.734472 | -5.851873 |

|   |           |           |           |
|---|-----------|-----------|-----------|
| 1 | 1.050898  | -4.152194 | -4.933965 |
| 1 | 3.060476  | -1.035975 | -4.014719 |
| 1 | 2.691651  | -1.941951 | -5.476880 |
| 1 | 1.042801  | -0.200072 | -3.142776 |
| 1 | 0.612335  | -0.415985 | -4.859996 |
| 1 | -0.506501 | -0.951625 | -3.586435 |
| 6 | -0.972328 | 1.848477  | -6.659593 |
| 6 | 0.875491  | 2.812389  | -5.311605 |
| 6 | -1.058438 | 4.262147  | -5.930757 |
| 1 | -2.999502 | 2.523775  | -6.919547 |
| 1 | -2.679455 | 0.953826  | -7.654671 |
| 1 | -3.011413 | -1.138446 | -4.655287 |
| 1 | -3.178876 | -1.102559 | -6.429119 |
| 1 | -1.595809 | -0.794216 | -5.669348 |
| 1 | -4.844244 | 2.068652  | -5.401657 |
| 1 | -4.940090 | 0.681694  | -6.521059 |
| 1 | -5.037451 | 0.414322  | -4.769328 |
| 6 | 0.800831  | 5.187908  | 3.485202  |
| 6 | 1.337784  | 6.044642  | 1.221105  |
| 6 | 2.115814  | 3.760395  | 1.881630  |
| 1 | 0.070513  | 4.424130  | 5.373613  |
| 1 | 0.724289  | 3.186489  | 4.293050  |
| 1 | -3.254618 | 4.727243  | 3.734255  |
| 1 | -2.255304 | 5.264471  | 5.113023  |

|   |           |           |           |
|---|-----------|-----------|-----------|
| 1 | -1.924621 | 5.863956  | 3.461816  |
| 1 | -1.194086 | 1.713209  | 4.498510  |
| 1 | -1.767206 | 2.869146  | 5.717556  |
| 1 | -2.858016 | 2.358326  | 4.421582  |
| 1 | 1.640400  | -3.835246 | 7.453120  |
| 1 | 0.482890  | -4.845858 | 6.580443  |
| 1 | 2.040015  | -5.905850 | 5.015151  |
| 1 | 3.231251  | -5.187164 | 6.131941  |
| 1 | 3.419063  | -4.970172 | 4.383058  |
| 1 | 3.431221  | -2.472506 | 4.517035  |
| 1 | 3.437600  | -2.644450 | 6.293652  |
| 1 | 2.239878  | -1.594687 | 5.481723  |
| 1 | 4.663076  | -2.934792 | -4.360369 |
| 1 | 3.317859  | -4.080346 | -4.268615 |
| 1 | 4.634052  | -1.929743 | -0.775055 |
| 1 | 5.483804  | -1.742751 | -2.332806 |
| 1 | 3.898551  | -0.962672 | -2.054419 |
| 1 | 4.144775  | -5.289764 | -2.296534 |
| 1 | 5.608643  | -4.308963 | -2.574023 |
| 1 | 4.896537  | -4.391171 | -0.954255 |
| 1 | -0.577675 | 2.249150  | -7.607104 |
| 1 | -0.434608 | 0.903179  | -6.473474 |
| 1 | 1.200283  | 1.842371  | -4.908179 |
| 1 | 1.387684  | 2.977180  | -6.272219 |

|   |           |           |           |
|---|-----------|-----------|-----------|
| 1 | 1.210519  | 3.599374  | -4.621832 |
| 1 | -0.819719 | 4.972280  | -5.125487 |
| 1 | -0.517488 | 4.576195  | -6.837310 |
| 1 | -2.137595 | 4.335664  | -6.125064 |
| 1 | 1.793787  | 5.427520  | 3.898541  |
| 1 | 0.214092  | 6.119098  | 3.539517  |
| 1 | 0.492421  | 6.747544  | 1.181704  |
| 1 | 2.183338  | 6.550645  | 1.711806  |
| 1 | 1.648231  | 5.819305  | 0.191676  |
| 1 | 2.268730  | 3.488651  | 0.826318  |
| 1 | 3.057088  | 4.178210  | 2.273380  |
| 1 | 1.889500  | 2.829458  | 2.421532  |
| 1 | -0.936519 | 0.405896  | 2.877836  |
| 6 | 2.561616  | -0.320331 | 2.698302  |
| 6 | 3.217323  | 0.512744  | 3.628561  |
| 6 | 3.343536  | -1.261619 | 1.995483  |
| 6 | 4.584144  | 0.389620  | 3.857313  |
| 1 | 2.637523  | 1.251637  | 4.184140  |
| 6 | 4.701596  | -1.372853 | 2.241773  |
| 1 | 2.863346  | -1.869576 | 1.230390  |
| 6 | 5.362288  | -0.554282 | 3.176574  |
| 1 | 5.043395  | 1.057539  | 4.585862  |
| 1 | 5.273377  | -2.107930 | 1.668830  |
| 6 | 6.872374  | -0.693153 | 3.376516  |

|   |          |           |          |
|---|----------|-----------|----------|
| 6 | 7.391983 | 0.240321  | 4.473439 |
| 1 | 8.476099 | 0.097773  | 4.595093 |
| 1 | 7.220258 | 1.296564  | 4.219212 |
| 1 | 6.910668 | 0.033248  | 5.440703 |
| 6 | 7.211140 | -2.140716 | 3.767737 |
| 1 | 6.904433 | -2.855145 | 2.990352 |
| 1 | 8.297062 | -2.249437 | 3.913923 |
| 1 | 6.704909 | -2.419957 | 4.703821 |
| 6 | 7.583930 | -0.336695 | 2.060424 |
| 1 | 7.353096 | 0.697311  | 1.765508 |
| 1 | 8.674910 | -0.427824 | 2.178204 |
| 1 | 7.273457 | -0.999651 | 1.239933 |

-----

**Table S26**

**[Bi-T/S]**

E : -3473.713174 Hartree

-----

| Atomic<br>Number | Coordinates (Angstroms) |           |          |
|------------------|-------------------------|-----------|----------|
|                  | X                       | Y         | Z        |
| 83               | 0.003531                | -0.068815 | 0.169810 |
| 6                | -0.202898               | 0.089618  | 2.384723 |
| 6                | 0.728499                | 0.219312  | 3.356346 |

-----

|   |           |           |           |
|---|-----------|-----------|-----------|
| 6 | -2.137009 | -0.864922 | 0.054984  |
| 6 | -2.420567 | -2.210132 | 0.292949  |
| 6 | -3.242052 | -0.036513 | -0.134493 |
| 6 | -1.413419 | -3.313441 | 0.530799  |
| 6 | -3.730583 | -2.708155 | 0.308448  |
| 6 | -3.186243 | 1.420430  | -0.561262 |
| 6 | -4.558324 | -0.488846 | -0.032869 |
| 6 | -2.258671 | -4.591348 | 0.235019  |
| 6 | -0.773248 | -3.300527 | 1.918331  |
| 6 | -0.181457 | -3.199738 | -0.346265 |
| 6 | -3.754839 | -4.224657 | 0.442584  |
| 6 | -4.817710 | -1.844067 | 0.180254  |
| 6 | -4.654593 | 1.897015  | -0.396480 |
| 6 | -2.621450 | 1.508658  | -1.977380 |
| 6 | -2.130223 | 2.176464  | 0.227773  |
| 6 | -5.561173 | 0.644925  | -0.172359 |
| 1 | -1.940013 | -5.443477 | 0.851966  |
| 1 | -2.102003 | -4.863569 | -0.819889 |
| 6 | 0.618362  | -3.474452 | 1.824680  |
| 6 | -1.345062 | -3.049185 | 3.149966  |
| 6 | 0.996892  | -3.391305 | 0.400611  |
| 6 | -0.112077 | -2.900480 | -1.696372 |
| 6 | -4.275572 | -4.671874 | 1.815771  |
| 6 | -4.627655 | -4.857246 | -0.647260 |

|   |           |           |           |
|---|-----------|-----------|-----------|
| 1 | -5.843726 | -2.220375 | 0.227661  |
| 1 | -4.974616 | 2.479251  | -1.272115 |
| 1 | -4.720018 | 2.566864  | 0.473081  |
| 6 | -1.368186 | 2.133802  | -1.987124 |
| 6 | -3.155407 | 1.040924  | -3.164907 |
| 6 | -1.026234 | 2.488937  | -0.595553 |
| 6 | -2.133266 | 2.570875  | 1.556204  |
| 6 | -6.525366 | 0.413924  | -1.341597 |
| 6 | -6.366672 | 0.791842  | 1.125573  |
| 6 | 1.394391  | -3.513287 | 2.973321  |
| 6 | -0.559734 | -2.998978 | 4.315139  |
| 1 | -2.405225 | -2.796755 | 3.209385  |
| 6 | 2.225312  | -3.360326 | -0.251913 |
| 6 | 1.127798  | -2.809211 | -2.355890 |
| 1 | -1.039205 | -2.700571 | -2.241030 |
| 1 | -5.290050 | -4.282393 | 1.990416  |
| 1 | -4.316065 | -5.770779 | 1.865849  |
| 1 | -3.627906 | -4.322624 | 2.629070  |
| 1 | -5.688450 | -4.600733 | -0.503770 |
| 1 | -4.541672 | -5.954163 | -0.617005 |
| 1 | -4.323918 | -4.512926 | -1.646713 |
| 6 | -0.707052 | 2.364425  | -3.186287 |
| 6 | -2.504754 | 1.259425  | -4.392203 |
| 1 | -4.100360 | 0.496172  | -3.145608 |

|   |           |           |           |
|---|-----------|-----------|-----------|
| 6 | 0.061330  | 3.187245  | -0.056269 |
| 6 | -1.054512 | 3.284969  | 2.101925  |
| 1 | -2.980727 | 2.308034  | 2.191783  |
| 1 | -7.111182 | -0.504930 | -1.188296 |
| 1 | -7.229550 | 1.255047  | -1.432049 |
| 1 | -5.987447 | 0.315471  | -2.295177 |
| 1 | -6.974175 | -0.105521 | 1.316381  |
| 1 | -7.044284 | 1.657226  | 1.062617  |
| 1 | -5.694898 | 0.935108  | 1.984963  |
| 6 | 0.817662  | -3.295529 | 4.235022  |
| 1 | 2.475546  | -3.647393 | 2.895035  |
| 6 | -1.248923 | -2.570043 | 5.612911  |
| 6 | 2.305529  | -3.094917 | -1.633523 |
| 1 | 3.140315  | -3.521955 | 0.321389  |
| 6 | 1.109462  | -2.353990 | -3.818213 |
| 6 | -1.275018 | 1.959078  | -4.404343 |
| 1 | 0.251997  | 2.884932  | -3.180484 |
| 6 | -3.146451 | 0.668799  | -5.654943 |
| 6 | 0.048170  | 3.623059  | 1.274084  |
| 1 | 0.902727  | 3.442988  | -0.703848 |
| 6 | -1.114594 | 3.708280  | 3.569135  |
| 6 | 1.731903  | -3.340025 | 5.463191  |
| 6 | -0.207621 | -2.302879 | 6.710369  |
| 6 | -2.010906 | -1.254495 | 5.381692  |

|   |           |           |           |
|---|-----------|-----------|-----------|
| 6 | -2.226977 | -3.669061 | 6.057864  |
| 6 | 3.682756  | -3.081539 | -2.301926 |
| 6 | 0.379494  | -3.400557 | -4.676186 |
| 6 | 2.535601  | -2.148351 | -4.357302 |
| 6 | 0.371382  | -1.010804 | -3.918941 |
| 6 | -0.593064 | 2.375551  | -5.710588 |
| 6 | -2.535537 | 1.280032  | -6.926302 |
| 6 | -2.914899 | -0.853709 | -5.652151 |
| 6 | -4.659533 | 0.931303  | -5.689280 |
| 6 | 1.248940  | 4.452260  | 1.744293  |
| 6 | 0.312787  | 3.980085  | 4.065442  |
| 6 | -1.992691 | 4.969587  | 3.664943  |
| 6 | -1.707432 | 2.609637  | 4.462377  |
| 6 | 0.881580  | -3.359864 | 6.741376  |
| 6 | 2.589814  | -4.613525 | 5.443231  |
| 6 | 2.658821  | -2.112996 | 5.460630  |
| 1 | -0.726252 | -2.243614 | 7.680857  |
| 1 | 0.241642  | -1.314083 | 6.524913  |
| 1 | -1.321708 | -0.510344 | 4.950113  |
| 1 | -2.389559 | -0.877908 | 6.345485  |
| 1 | -2.875750 | -1.381076 | 4.713677  |
| 1 | -2.965544 | -3.879341 | 5.269101  |
| 1 | -2.772628 | -3.350116 | 6.959641  |
| 1 | -1.704238 | -4.610640 | 6.282079  |

|   |           |           |           |
|---|-----------|-----------|-----------|
| 6 | 3.512023  | -3.181764 | -3.825206 |
| 6 | 4.417538  | -1.784798 | -1.924850 |
| 6 | 4.527718  | -4.278019 | -1.840940 |
| 1 | -0.644859 | -3.572024 | -4.314429 |
| 1 | 0.316810  | -3.055760 | -5.720226 |
| 1 | 0.905822  | -4.366235 | -4.662079 |
| 1 | 2.886072  | -1.140848 | -4.082860 |
| 1 | 2.505095  | -2.168993 | -5.458043 |
| 1 | 0.866043  | -0.244547 | -3.301206 |
| 1 | 0.378520  | -0.662236 | -4.964092 |
| 1 | -0.679163 | -1.066305 | -3.594832 |
| 6 | -1.026332 | 1.436488  | -6.845794 |
| 6 | 0.938127  | 2.338768  | -5.611408 |
| 6 | -1.018878 | 3.823970  | -6.019428 |
| 1 | -2.996980 | 2.263151  | -7.111579 |
| 1 | -2.810682 | 0.646833  | -7.784901 |
| 1 | -3.296568 | -1.306243 | -4.724060 |
| 1 | -3.439208 | -1.318124 | -6.501461 |
| 1 | -1.846879 | -1.100587 | -5.728116 |
| 1 | -4.877175 | 2.001740  | -5.558582 |
| 1 | -5.063415 | 0.612641  | -6.662494 |
| 1 | -5.199875 | 0.370807  | -4.913272 |
| 6 | 1.049332  | 4.968919  | 3.180602  |
| 6 | 1.435750  | 5.668725  | 0.823069  |

|   |           |           |           |
|---|-----------|-----------|-----------|
| 6 | 2.507557  | 3.573674  | 1.685001  |
| 1 | 0.261006  | 4.356626  | 5.099068  |
| 1 | 0.842299  | 3.012150  | 4.101198  |
| 1 | -3.029717 | 4.734665  | 3.380865  |
| 1 | -1.998719 | 5.346832  | 4.699267  |
| 1 | -1.643482 | 5.773992  | 3.001718  |
| 1 | -1.104415 | 1.691262  | 4.382017  |
| 1 | -1.675454 | 2.953372  | 5.507780  |
| 1 | -2.760290 | 2.393841  | 4.228758  |
| 1 | 1.545179  | -3.213545 | 7.608830  |
| 1 | 0.429056  | -4.360250 | 6.856738  |
| 1 | 1.963061  | -5.511432 | 5.333083  |
| 1 | 3.148453  | -4.693850 | 6.388830  |
| 1 | 3.325089  | -4.603128 | 4.625825  |
| 1 | 3.291616  | -2.097562 | 4.558333  |
| 1 | 3.319564  | -2.140273 | 6.342343  |
| 1 | 2.084805  | -1.175854 | 5.458992  |
| 1 | 4.498312  | -3.064609 | -4.301689 |
| 1 | 3.157035  | -4.196053 | -4.076432 |
| 1 | 4.555232  | -1.722854 | -0.836795 |
| 1 | 5.410685  | -1.753294 | -2.400154 |
| 1 | 3.856271  | -0.889268 | -2.225811 |
| 1 | 3.988743  | -5.224535 | -1.993080 |
| 1 | 5.460486  | -4.315605 | -2.423778 |

|   |           |           |           |
|---|-----------|-----------|-----------|
| 1 | 4.808283  | -4.207723 | -0.780800 |
| 1 | -0.632309 | 1.825180  | -7.798263 |
| 1 | -0.553342 | 0.451380  | -6.692114 |
| 1 | 1.295716  | 1.363409  | -5.251755 |
| 1 | 1.372607  | 2.519295  | -6.606152 |
| 1 | 1.331382  | 3.117684  | -4.943063 |
| 1 | -0.678734 | 4.497016  | -5.218381 |
| 1 | -0.573296 | 4.161266  | -6.968777 |
| 1 | -2.110796 | 3.924882  | -6.088516 |
| 1 | 2.038901  | 5.205484  | 3.601723  |
| 1 | 0.494273  | 5.920653  | 3.153495  |
| 1 | 0.511579  | 6.263366  | 0.762782  |
| 1 | 2.232883  | 6.311964  | 1.225833  |
| 1 | 1.727343  | 5.379617  | -0.196928 |
| 1 | 2.674518  | 3.172119  | 0.673415  |
| 1 | 3.394372  | 4.162771  | 1.965183  |
| 1 | 2.427274  | 2.721179  | 2.370034  |
| 1 | -1.281266 | 0.000744  | 2.595015  |
| 6 | 2.148785  | 0.119669  | 3.020624  |
| 6 | 3.088713  | 0.852079  | 3.782216  |
| 6 | 2.708017  | -0.780007 | 2.085786  |
| 6 | 4.459924  | 0.710609  | 3.620333  |
| 1 | 2.699068  | 1.522740  | 4.552248  |
| 6 | 4.085322  | -0.955216 | 1.953264  |

|   |          |           |          |
|---|----------|-----------|----------|
| 1 | 2.050579 | -1.447503 | 1.533490 |
| 6 | 4.998237 | -0.226112 | 2.720588 |
| 1 | 5.121404 | 1.306753  | 4.249589 |
| 1 | 4.453722 | -1.719791 | 1.263668 |
| 6 | 6.495048 | -0.529469 | 2.618621 |
| 6 | 7.330401 | 0.415011  | 3.486966 |
| 1 | 8.398086 | 0.176586  | 3.372533 |
| 1 | 7.181706 | 1.465533  | 3.196222 |
| 1 | 7.076646 | 0.312699  | 4.552167 |
| 6 | 6.743592 | -1.970915 | 3.096161 |
| 1 | 6.198395 | -2.697065 | 2.474781 |
| 1 | 7.816417 | -2.215884 | 3.046299 |
| 1 | 6.404772 | -2.095730 | 4.135738 |
| 6 | 6.956871 | -0.387142 | 1.160020 |
| 1 | 6.771392 | 0.633432  | 0.793336 |
| 1 | 8.034205 | -0.598868 | 1.074519 |
| 1 | 6.424640 | -1.085793 | 0.498262 |

---

**Table S27**

**[N-Prod]<sup>1</sup>**

E : -3313.92433896 Hartree

G : -3312.37832450 Hartree

---

| Atomic | Coordinates (Angstroms) |           |           |
|--------|-------------------------|-----------|-----------|
| Number | X                       | Y         | Z         |
| 6      | 0.029979                | 0.153132  | -0.093974 |
| 6      | -0.024875               | 0.161575  | 1.319714  |
| 6      | 1.174960                | 0.146891  | 2.056595  |
| 6      | 2.422820                | 0.064467  | 1.447347  |
| 1      | 3.334786                | 0.032264  | 2.049766  |
| 6      | 2.475010                | -0.002440 | 0.059506  |
| 6      | 1.300925                | 0.057373  | -0.691171 |
| 6      | -0.554024               | -0.028704 | 3.676918  |
| 1      | -1.034357               | 0.571710  | 4.462808  |
| 1      | -0.710825               | -1.086208 | 3.932004  |
| 6      | 0.958757                | 0.230981  | 3.556765  |
| 6      | 1.355881                | 1.614939  | 4.090400  |
| 1      | 1.213000                | 1.656557  | 5.181322  |
| 1      | 2.414200                | 1.825072  | 3.873320  |
| 1      | 0.748596                | 2.410683  | 3.640412  |
| 6      | 1.756944                | -0.840064 | 4.307978  |
| 1      | 1.484505                | -0.840637 | 5.374689  |
| 1      | 1.555091                | -1.840259 | 3.896992  |
| 1      | 2.839216                | -0.652763 | 4.240004  |
| 6      | 3.117039                | -0.347561 | -2.219202 |
| 1      | 3.175740                | -1.406483 | -2.509024 |

|   |           |           |           |
|---|-----------|-----------|-----------|
| 1 | 3.666513  | 0.225855  | -2.979517 |
| 6 | 3.715807  | -0.173704 | -0.798175 |
| 6 | 4.649935  | 1.039132  | -0.698190 |
| 1 | 5.553300  | 0.874393  | -1.305307 |
| 1 | 4.165356  | 1.955172  | -1.060068 |
| 1 | 4.964049  | 1.204941  | 0.343627  |
| 6 | 4.488609  | -1.430366 | -0.377190 |
| 1 | 5.328717  | -1.612645 | -1.065149 |
| 1 | 4.899292  | -1.321891 | 0.638285  |
| 1 | 3.832453  | -2.313256 | -0.388478 |
| 6 | -1.218787 | 0.233681  | 2.276891  |
| 6 | -1.987537 | 1.551088  | 2.281314  |
| 6 | -1.518765 | 2.850513  | 2.239335  |
| 1 | -0.457474 | 3.029890  | 2.055421  |
| 6 | -2.389284 | 3.942302  | 2.417694  |
| 6 | -3.769208 | 3.702300  | 2.600061  |
| 6 | -4.240534 | 2.379224  | 2.579379  |
| 1 | -5.307887 | 2.181810  | 2.696401  |
| 6 | -3.365762 | 1.315386  | 2.411881  |
| 6 | -3.598379 | -0.129669 | 2.301420  |
| 6 | -4.766682 | -0.877983 | 2.288316  |
| 1 | -5.727777 | -0.372689 | 2.401021  |
| 6 | -4.728403 | -2.273803 | 2.129627  |
| 6 | -3.477717 | -2.915046 | 1.970527  |

|   |           |           |          |
|---|-----------|-----------|----------|
| 6 | -2.301544 | -2.141630 | 2.002395 |
| 1 | -1.327020 | -2.625433 | 1.894984 |
| 6 | -2.358113 | -0.767263 | 2.144165 |
| 6 | -1.783535 | 5.348747  | 2.360691 |
| 6 | -0.500489 | 5.436167  | 3.200579 |
| 1 | -0.161952 | 6.482849  | 3.246215 |
| 1 | -0.675917 | 5.085134  | 4.228736 |
| 1 | 0.321166  | 4.846149  | 2.770248 |
| 6 | -1.440146 | 5.662522  | 0.896368 |
| 1 | -2.339706 | 5.656170  | 0.265412 |
| 1 | -0.951957 | 6.647848  | 0.814407 |
| 1 | -0.760435 | 4.902618  | 0.484191 |
| 6 | -2.773256 | 6.391627  | 2.900322 |
| 1 | -2.767846 | 6.361453  | 4.002289 |
| 1 | -2.414475 | 7.394593  | 2.617930 |
| 6 | -4.772949 | 4.830105  | 2.859593 |
| 6 | -5.085789 | 4.874838  | 4.365341 |
| 1 | -5.521785 | 3.919586  | 4.693367 |
| 1 | -4.180935 | 5.045404  | 4.964998 |
| 1 | -5.807697 | 5.677668  | 4.584138 |
| 6 | -6.085879 | 4.606518  | 2.096352 |
| 1 | -5.887819 | 4.428389  | 1.029453 |
| 1 | -6.662970 | 3.757638  | 2.488721 |
| 1 | -6.720522 | 5.501700  | 2.185856 |

|   |           |           |           |
|---|-----------|-----------|-----------|
| 6 | -4.185197 | 6.167393  | 2.389837  |
| 1 | -4.186895 | 6.178004  | 1.287426  |
| 1 | -4.850347 | 6.984049  | 2.714425  |
| 6 | -3.334783 | -4.433214 | 1.812581  |
| 6 | 1.607999  | 0.064636  | -2.182359 |
| 6 | 1.356848  | 1.424850  | -2.826217 |
| 6 | 1.805903  | 2.673430  | -2.437676 |
| 1 | 2.352501  | 2.776236  | -1.498150 |
| 6 | 1.559913  | 3.815518  | -3.225304 |
| 6 | 0.792724  | 3.681717  | -4.403234 |
| 6 | 0.300940  | 2.413715  | -4.761231 |
| 1 | -0.302543 | 2.303415  | -5.663902 |
| 6 | 0.584173  | 1.294473  | -3.991339 |
| 6 | 0.214216  | -0.118855 | -4.144634 |
| 6 | -0.552100 | -0.772776 | -5.096520 |
| 1 | -0.997649 | -0.200357 | -5.912668 |
| 6 | -0.762737 | -2.160577 | -5.022667 |
| 6 | -0.149957 | -2.892582 | -3.982580 |
| 6 | 0.603283  | -2.206352 | -3.010686 |
| 1 | 1.055825  | -2.760036 | -2.183496 |
| 6 | 0.776881  | -0.838611 | -3.080843 |
| 6 | 2.129016  | 5.153722  | -2.736392 |
| 6 | 3.604335  | 5.003041  | -2.333072 |
| 1 | 4.031014  | 5.994884  | -2.117178 |

|   |           |           |           |
|---|-----------|-----------|-----------|
| 1 | 3.728421  | 4.389313  | -1.429664 |
| 1 | 4.188805  | 4.544107  | -3.144360 |
| 6 | 1.335561  | 5.619663  | -1.504069 |
| 1 | 0.280721  | 5.818027  | -1.743125 |
| 1 | 1.353084  | 4.849265  | -0.718283 |
| 1 | 1.775423  | 6.541190  | -1.090841 |
| 6 | 2.054464  | 6.216765  | -3.843687 |
| 1 | 2.216991  | 7.208213  | -3.391291 |
| 1 | 2.887289  | 6.060885  | -4.548208 |
| 6 | 0.521597  | 4.859523  | -5.344844 |
| 6 | -0.918015 | 4.835132  | -5.881973 |
| 1 | -1.073391 | 4.028709  | -6.612087 |
| 1 | -1.647686 | 4.697665  | -5.070315 |
| 1 | -1.137567 | 5.784982  | -6.394335 |
| 6 | 1.482525  | 4.759703  | -6.543447 |
| 1 | 1.321163  | 3.814582  | -7.082330 |
| 1 | 1.309088  | 5.591542  | -7.244555 |
| 1 | 2.534714  | 4.781224  | -6.227845 |
| 6 | 0.738598  | 6.185888  | -4.601184 |
| 1 | 0.692262  | 7.013002  | -5.328010 |
| 1 | -0.096061 | 6.348504  | -3.898884 |
| 6 | -1.630047 | -2.816962 | -6.103190 |
| 6 | -2.923127 | -2.018841 | -6.328830 |
| 1 | -3.458826 | -1.865378 | -5.380499 |

|   |           |           |           |
|---|-----------|-----------|-----------|
| 1 | -2.734006 | -1.033969 | -6.777671 |
| 1 | -3.583465 | -2.572184 | -7.014644 |
| 6 | -0.843374 | -2.862319 | -7.424137 |
| 1 | -0.557189 | -1.847361 | -7.736844 |
| 1 | 0.081224  | -3.448490 | -7.326331 |
| 1 | -1.457498 | -3.308121 | -8.222565 |
| 6 | -2.030323 | -4.236334 | -5.674400 |
| 1 | -2.819235 | -4.166809 | -4.906916 |
| 1 | -2.480667 | -4.754319 | -6.536483 |
| 6 | -0.285172 | -4.412645 | -3.840926 |
| 6 | -1.206514 | -4.717241 | -2.649322 |
| 1 | -2.212890 | -4.299292 | -2.798941 |
| 1 | -1.298795 | -5.804489 | -2.495632 |
| 1 | -0.799091 | -4.273604 | -1.729605 |
| 6 | 1.081990  | -5.063755 | -3.581029 |
| 1 | 0.977514  | -6.159868 | -3.597247 |
| 1 | 1.806660  | -4.774622 | -4.356455 |
| 1 | 1.497516  | -4.786676 | -2.602285 |
| 6 | -0.856465 | -5.027370 | -5.126932 |
| 1 | -0.058029 | -5.075467 | -5.885732 |
| 1 | -1.150503 | -6.069260 | -4.921117 |
| 6 | -2.788299 | -5.017311 | 3.126808  |
| 1 | -3.469180 | -4.827141 | 3.968600  |
| 1 | -2.645267 | -6.105052 | 3.031519  |

|   |           |           |           |
|---|-----------|-----------|-----------|
| 1 | -1.818049 | -4.563997 | 3.377746  |
| 6 | -2.364144 | -4.775727 | 0.674709  |
| 1 | -2.673044 | -4.283995 | -0.259015 |
| 1 | -1.330502 | -4.474204 | 0.894955  |
| 1 | -2.360760 | -5.863436 | 0.502290  |
| 6 | -4.688589 | -5.073802 | 1.472113  |
| 1 | -4.911671 | -4.893823 | 0.407567  |
| 1 | -4.600984 | -6.165932 | 1.587703  |
| 6 | -6.059568 | -3.033977 | 2.103029  |
| 6 | -7.003912 | -2.545056 | 3.211372  |
| 1 | -7.358433 | -1.519406 | 3.039709  |
| 1 | -7.891282 | -3.195403 | 3.249979  |
| 1 | -6.508792 | -2.578840 | 4.192986  |
| 6 | -6.736944 | -2.798176 | 0.741761  |
| 1 | -6.112704 | -3.153295 | -0.090379 |
| 1 | -7.705895 | -3.319994 | 0.698579  |
| 1 | -6.916966 | -1.724600 | 0.583119  |
| 6 | -5.820054 | -4.534138 | 2.327016  |
| 1 | -5.592940 | -4.702789 | 3.392850  |
| 6 | -2.395087 | -0.219865 | -0.620699 |
| 1 | -2.946224 | -1.146760 | -0.513911 |
| 6 | -2.235638 | 1.045149  | -0.795800 |
| 6 | -2.624663 | 2.391173  | -1.134672 |
| 6 | -3.923139 | 2.858120  | -0.870605 |

|   |           |           |           |
|---|-----------|-----------|-----------|
| 1 | -4.619416 | 2.225266  | -0.317144 |
| 6 | -4.317643 | 4.106520  | -1.330809 |
| 1 | -5.340454 | 4.437359  | -1.138358 |
| 6 | -3.445476 | 4.937769  | -2.056420 |
| 6 | -2.153625 | 4.459737  | -2.297649 |
| 1 | -1.437518 | 5.057202  | -2.860223 |
| 6 | -1.738802 | 3.208424  | -1.842003 |
| 1 | -0.732613 | 2.846461  | -2.057982 |
| 6 | -3.938287 | 6.295073  | -2.567163 |
| 6 | -5.028799 | 6.055252  | -3.624677 |
| 1 | -4.630936 | 5.465263  | -4.463763 |
| 1 | -5.398545 | 7.014777  | -4.018166 |
| 1 | -5.883046 | 5.507654  | -3.200533 |
| 6 | -4.521531 | 7.117654  | -1.407165 |
| 1 | -5.346751 | 6.595246  | -0.901734 |
| 1 | -4.911992 | 8.075318  | -1.783939 |
| 1 | -3.746183 | 7.337090  | -0.657502 |
| 6 | -2.808296 | 7.110340  | -3.202100 |
| 1 | -1.982006 | 7.269899  | -2.491360 |
| 1 | -3.188942 | 8.096252  | -3.506799 |
| 1 | -2.403733 | 6.617526  | -4.097498 |
| 7 | -1.040911 | 0.185269  | -1.052992 |
| 1 | -6.755940 | -5.077279 | 2.119382  |

**Table S28****[P-Prod]<sup>1</sup>**

E : -3600.52190990 Hartree

G : -3598.96446009 Hartree

---

| Atomic | Coordinates (Angstroms) |           |           |
|--------|-------------------------|-----------|-----------|
| Number | X                       | Y         | Z         |
| 6      | -0.026288               | 0.009254  | -0.040151 |
| 6      | -0.072085               | 0.041787  | 1.372510  |
| 6      | 1.115247                | 0.116491  | 2.125528  |
| 6      | 2.363917                | 0.145680  | 1.517722  |
| 1      | 3.275865                | 0.186013  | 2.120393  |
| 6      | 2.429029                | 0.091846  | 0.131644  |
| 6      | 1.259148                | 0.030894  | -0.637327 |
| 6      | -0.600595               | -0.245483 | 3.712670  |
| 1      | -1.130006               | 0.249475  | 4.539666  |
| 1      | -0.683587               | -1.331138 | 3.868469  |
| 6      | 0.889695                | 0.126887  | 3.626478  |
| 6      | 1.192341                | 1.503375  | 4.235889  |
| 1      | 1.054433                | 1.470858  | 5.327674  |
| 1      | 2.233836                | 1.795545  | 4.031284  |
| 1      | 0.531085                | 2.281991  | 3.836316  |

---

|   |           |           |           |
|---|-----------|-----------|-----------|
| 6 | 1.754709  | -0.925470 | 4.329725  |
| 1 | 1.473720  | -1.000434 | 5.391596  |
| 1 | 1.626154  | -1.914150 | 3.865272  |
| 1 | 2.821898  | -0.660164 | 4.284694  |
| 6 | 3.169641  | -0.192378 | -2.117145 |
| 1 | 3.330053  | -1.245410 | -2.388349 |
| 1 | 3.683888  | 0.418103  | -2.873166 |
| 6 | 3.705414  | 0.049297  | -0.686933 |
| 6 | 4.506158  | 1.352433  | -0.567071 |
| 1 | 5.441184  | 1.277776  | -1.143261 |
| 1 | 3.943560  | 2.212174  | -0.951992 |
| 1 | 4.767563  | 1.554559  | 0.482870  |
| 6 | 4.594056  | -1.118358 | -0.237884 |
| 1 | 5.463412  | -1.216228 | -0.906349 |
| 1 | 4.969990  | -0.961712 | 0.784640  |
| 1 | 4.033638  | -2.064738 | -0.255672 |
| 6 | -1.266828 | 0.085373  | 2.330919  |
| 6 | -1.992631 | 1.426797  | 2.402570  |
| 6 | -1.500076 | 2.712431  | 2.303256  |
| 1 | -0.450316 | 2.862424  | 2.041410  |
| 6 | -2.334170 | 3.828251  | 2.513604  |
| 6 | -3.703260 | 3.624528  | 2.787396  |
| 6 | -4.203121 | 2.311081  | 2.832804  |
| 1 | -5.266233 | 2.140623  | 3.012673  |

|   |           |           |          |
|---|-----------|-----------|----------|
| 6 | -3.364256 | 1.225128  | 2.632059 |
| 6 | -3.643582 | -0.210802 | 2.497249 |
| 6 | -4.834988 | -0.920416 | 2.500158 |
| 1 | -5.768530 | -0.402211 | 2.728789 |
| 6 | -4.860274 | -2.286813 | 2.167609 |
| 6 | -3.651168 | -2.936929 | 1.830769 |
| 6 | -2.444341 | -2.213598 | 1.883470 |
| 1 | -1.500300 | -2.705962 | 1.637225 |
| 6 | -2.439734 | -0.867792 | 2.191245 |
| 6 | -1.700470 | 5.215784  | 2.371373 |
| 6 | -0.384425 | 5.304755  | 3.158484 |
| 1 | -0.012562 | 6.340961  | 3.137902 |
| 1 | -0.531838 | 5.012116  | 4.209197 |
| 1 | 0.401596  | 4.666369  | 2.730300 |
| 6 | -1.407764 | 5.452337  | 0.882229 |
| 1 | -2.333662 | 5.464465  | 0.291090 |
| 1 | -0.879027 | 6.409072  | 0.736490 |
| 1 | -0.782768 | 4.644802  | 0.474962 |
| 6 | -2.641828 | 6.309761  | 2.896523 |
| 1 | -2.577592 | 6.350345  | 3.996177 |
| 1 | -2.282391 | 7.285732  | 2.531721 |
| 6 | -4.664344 | 4.786145  | 3.058376 |
| 6 | -4.869275 | 4.914112  | 4.577741 |
| 1 | -5.308398 | 3.989705  | 4.981403 |

|   |           |           |           |
|---|-----------|-----------|-----------|
| 1 | -3.920234 | 5.083046  | 5.104933  |
| 1 | -5.550874 | 5.749076  | 4.805716  |
| 6 | -6.033331 | 4.556341  | 2.403010  |
| 1 | -5.920393 | 4.321744  | 1.334520  |
| 1 | -6.597110 | 3.741775  | 2.878441  |
| 1 | -6.641750 | 5.469427  | 2.493200  |
| 6 | -4.082870 | 6.082168  | 2.476707  |
| 1 | -4.141935 | 6.025940  | 1.376607  |
| 1 | -4.716240 | 6.929716  | 2.785758  |
| 6 | -3.584890 | -4.412138 | 1.423527  |
| 6 | 1.628956  | 0.081317  | -2.129248 |
| 6 | 1.297897  | 1.418666  | -2.794019 |
| 6 | 1.621353  | 2.703820  | -2.396786 |
| 1 | 2.084097  | 2.861978  | -1.420591 |
| 6 | 1.385724  | 3.809729  | -3.238792 |
| 6 | 0.714315  | 3.606957  | -4.464444 |
| 6 | 0.341267  | 2.301735  | -4.832527 |
| 1 | -0.174138 | 2.134276  | -5.780201 |
| 6 | 0.648542  | 1.216304  | -4.024053 |
| 6 | 0.422834  | -0.224831 | -4.198186 |
| 6 | -0.231033 | -0.942399 | -5.187116 |
| 1 | -0.662175 | -0.413004 | -6.039087 |
| 6 | -0.359345 | -2.339039 | -5.097699 |
| 6 | 0.230121  | -3.015632 | -4.006684 |

|   |           |           |           |
|---|-----------|-----------|-----------|
| 6 | 0.879837  | -2.268811 | -3.006906 |
| 1 | 1.305807  | -2.777863 | -2.138007 |
| 6 | 0.958429  | -0.892629 | -3.088276 |
| 6 | 1.900463  | 5.180089  | -2.778467 |
| 6 | 3.360849  | 5.074479  | -2.309590 |
| 1 | 3.760298  | 6.082454  | -2.117707 |
| 1 | 3.456816  | 4.500844  | -1.376886 |
| 1 | 3.987188  | 4.593993  | -3.075974 |
| 6 | 1.053096  | 5.681031  | -1.599574 |
| 1 | -0.001688 | 5.822005  | -1.875952 |
| 1 | 1.077763  | 4.956251  | -0.772994 |
| 1 | 1.446587  | 6.639238  | -1.224574 |
| 6 | 1.857192  | 6.192072  | -3.934011 |
| 1 | 1.986120  | 7.204812  | -3.519882 |
| 1 | 2.720900  | 6.018223  | -4.596212 |
| 6 | 0.422686  | 4.747060  | -5.446711 |
| 6 | -1.006261 | 4.655645  | -6.004285 |
| 1 | -1.135300 | 3.797111  | -6.677905 |
| 1 | -1.747774 | 4.564155  | -5.196984 |
| 1 | -1.233398 | 5.563591  | -6.584728 |
| 6 | 1.408062  | 4.648802  | -6.625034 |
| 1 | 1.295111  | 3.683307  | -7.139473 |
| 1 | 1.215169  | 5.452092  | -7.353509 |
| 1 | 2.452507  | 4.722613  | -6.291614 |

|   |           |           |           |
|---|-----------|-----------|-----------|
| 6 | 0.575602  | 6.103356  | -4.742466 |
| 1 | 0.538114  | 6.902958  | -5.499722 |
| 1 | -0.290464 | 6.268877  | -4.080276 |
| 6 | -1.113975 | -3.065060 | -6.217386 |
| 6 | -2.435017 | -2.350861 | -6.541247 |
| 1 | -3.036441 | -2.209950 | -5.631210 |
| 1 | -2.276854 | -1.366452 | -7.002971 |
| 1 | -3.017246 | -2.957743 | -7.251938 |
| 6 | -0.239561 | -3.082606 | -7.482766 |
| 1 | 0.008559  | -2.057390 | -7.794601 |
| 1 | 0.708042  | -3.613357 | -7.314190 |
| 1 | -0.773326 | -3.574630 | -8.311102 |
| 6 | -1.455651 | -4.499967 | -5.789300 |
| 1 | -2.301663 | -4.468921 | -5.082984 |
| 1 | -1.808514 | -5.058106 | -6.671414 |
| 6 | 0.158393  | -4.536262 | -3.832767 |
| 6 | -0.842287 | -4.855803 | -2.709944 |
| 1 | -1.851664 | -4.492498 | -2.949791 |
| 1 | -0.892596 | -5.942350 | -2.534064 |
| 1 | -0.535564 | -4.368164 | -1.773457 |
| 6 | 1.529353  | -5.112324 | -3.447903 |
| 1 | 1.478437  | -6.212210 | -3.443179 |
| 1 | 2.300270  | -4.805928 | -4.170364 |
| 1 | 1.850551  | -4.794058 | -2.446423 |

|   |           |           |           |
|---|-----------|-----------|-----------|
| 6 | -0.279332 | -5.207917 | -5.142520 |
| 1 | 0.574260  | -5.221412 | -5.840429 |
| 1 | -0.525911 | -6.261562 | -4.934604 |
| 6 | -3.005114 | -5.227856 | 2.591906  |
| 1 | -3.635718 | -5.158718 | 3.489488  |
| 1 | -2.913789 | -6.288406 | 2.309342  |
| 1 | -2.005212 | -4.857035 | 2.861498  |
| 6 | -2.678962 | -4.595194 | 0.197252  |
| 1 | -2.965579 | -3.905934 | -0.611219 |
| 1 | -1.620220 | -4.419472 | 0.432734  |
| 1 | -2.763730 | -5.626578 | -0.179689 |
| 6 | -4.983087 | -4.929616 | 1.055981  |
| 1 | -5.253315 | -4.547362 | 0.057681  |
| 1 | -4.941944 | -6.026948 | 0.966253  |
| 6 | -6.221511 | -2.990916 | 2.129867  |
| 6 | -7.042959 | -2.672297 | 3.387841  |
| 1 | -7.345081 | -1.616938 | 3.435196  |
| 1 | -7.962194 | -3.278165 | 3.390199  |
| 1 | -6.472660 | -2.907743 | 4.298431  |
| 6 | -6.997982 | -2.499842 | 0.895350  |
| 1 | -6.462171 | -2.727862 | -0.037193 |
| 1 | -7.990964 | -2.974185 | 0.852116  |
| 1 | -7.140125 | -1.409745 | 0.935887  |
| 6 | -6.037760 | -4.514468 | 2.065712  |

|   |           |           |           |
|---|-----------|-----------|-----------|
| 1 | -5.756721 | -4.882657 | 3.066233  |
| 6 | -3.042440 | 0.035932  | -0.460178 |
| 1 | -3.874260 | -0.519340 | -0.032867 |
| 6 | -2.625498 | 1.192168  | -0.906106 |
| 6 | -2.934157 | 2.578031  | -1.209972 |
| 6 | -4.123264 | 3.177278  | -0.762208 |
| 1 | -4.789077 | 2.612266  | -0.105899 |
| 6 | -4.451242 | 4.465313  | -1.164381 |
| 1 | -5.390345 | 4.903930  | -0.818622 |
| 6 | -3.608941 | 5.209330  | -2.010148 |
| 6 | -2.420190 | 4.604937  | -2.430780 |
| 1 | -1.730354 | 5.136369  | -3.083678 |
| 6 | -2.080914 | 3.310412  | -2.038786 |
| 1 | -1.153552 | 2.851578  | -2.392278 |
| 6 | -4.012345 | 6.623278  | -2.436190 |
| 6 | -5.290777 | 6.542570  | -3.286335 |
| 1 | -5.119564 | 5.934927  | -4.187140 |
| 1 | -5.605116 | 7.549876  | -3.600431 |
| 1 | -6.118122 | 6.087542  | -2.722748 |
| 6 | -4.279064 | 7.483294  | -1.189929 |
| 1 | -5.105689 | 7.081981  | -0.585755 |
| 1 | -4.549915 | 8.507742  | -1.487920 |
| 1 | -3.383973 | 7.534893  | -0.550909 |
| 6 | -2.915400 | 7.301942  | -3.261569 |

|    |           |           |           |
|----|-----------|-----------|-----------|
| 1  | -1.976128 | 7.378829  | -2.691670 |
| 1  | -3.231131 | 8.320084  | -3.532159 |
| 1  | -2.709572 | 6.755256  | -4.194096 |
| 15 | -1.428525 | -0.140558 | -1.295960 |
| 1  | -7.008442 | -4.977879 | 1.827059  |

---

**Table S29**

**[As-Prod]<sup>1</sup>**

E : -5494.89855181 Hartree

G : -5493.353589 Hartree

---

| Atomic<br>Number | Coordinates (Angstroms) |           |           |
|------------------|-------------------------|-----------|-----------|
|                  | X                       | Y         | Z         |
| 6                | -0.044063               | 0.000245  | -0.019738 |
| 6                | -0.028938               | -0.010219 | 1.393079  |
| 6                | 1.189032                | 0.047327  | 2.097779  |
| 6                | 2.406867                | 0.152743  | 1.437048  |
| 1                | 3.344050                | 0.197341  | 1.999419  |
| 6                | 2.409592                | 0.156949  | 0.048126  |
| 6                | 1.208860                | 0.059192  | -0.669727 |
| 6                | -0.458834               | -0.443989 | 3.728247  |
| 1                | -0.943840               | -0.003948 | 4.611746  |

|   |           |           |           |
|---|-----------|-----------|-----------|
| 1 | -0.554057 | -1.536824 | 3.808865  |
| 6 | 1.033871  | -0.082993 | 3.603172  |
| 6 | 1.398148  | 1.209232  | 4.347100  |
| 1 | 1.340121  | 1.045955  | 5.434267  |
| 1 | 2.426000  | 1.520103  | 4.104172  |
| 1 | 0.719007  | 2.032759  | 4.096829  |
| 6 | 1.911510  | -1.220603 | 4.141191  |
| 1 | 1.685360  | -1.406185 | 5.202648  |
| 1 | 1.736425  | -2.150122 | 3.579948  |
| 1 | 2.980297  | -0.969188 | 4.064491  |
| 6 | 3.055754  | -0.123070 | -2.220030 |
| 1 | 3.236511  | -1.188512 | -2.422514 |
| 1 | 3.514442  | 0.449172  | -3.039268 |
| 6 | 3.641194  | 0.225990  | -0.835157 |
| 6 | 4.276563  | 1.623148  | -0.802260 |
| 1 | 5.184772  | 1.640506  | -1.424270 |
| 1 | 3.591822  | 2.389621  | -1.186507 |
| 1 | 4.559696  | 1.896430  | 0.225802  |
| 6 | 4.691238  | -0.806855 | -0.410442 |
| 1 | 5.518556  | -0.830679 | -1.136392 |
| 1 | 5.116891  | -0.560497 | 0.574239  |
| 1 | 4.250821  | -1.813137 | -0.352458 |
| 6 | -1.178302 | -0.004963 | 2.407289  |
| 6 | -1.842707 | 1.359977  | 2.589239  |

|   |           |           |          |
|---|-----------|-----------|----------|
| 6 | -1.288427 | 2.625410  | 2.596576 |
| 1 | -0.225462 | 2.744673  | 2.374490 |
| 6 | -2.072538 | 3.762771  | 2.879544 |
| 6 | -3.463361 | 3.610156  | 3.062131 |
| 6 | -4.019423 | 2.317991  | 3.033048 |
| 1 | -5.095390 | 2.189731  | 3.168406 |
| 6 | -3.222053 | 1.205313  | 2.812254 |
| 6 | -3.561878 | -0.213638 | 2.627373 |
| 6 | -4.777886 | -0.879885 | 2.661683 |
| 1 | -5.681248 | -0.335247 | 2.944327 |
| 6 | -4.865002 | -2.238730 | 2.311834 |
| 6 | -3.694592 | -2.922466 | 1.913698 |
| 6 | -2.463268 | -2.239357 | 1.919253 |
| 1 | -1.548122 | -2.762445 | 1.630005 |
| 6 | -2.394919 | -0.902189 | 2.257992 |
| 6 | -1.354953 | 5.114534  | 2.976734 |
| 6 | -0.155180 | 5.007540  | 3.931860 |
| 1 | 0.275952  | 6.007106  | 4.097604 |
| 1 | -0.462588 | 4.597589  | 4.905643 |
| 1 | 0.641390  | 4.368083  | 3.525292 |
| 6 | -0.835001 | 5.526303  | 1.591995 |
| 1 | -1.647370 | 5.659853  | 0.862525 |
| 1 | -0.268381 | 6.468589  | 1.660245 |
| 1 | -0.162636 | 4.755114  | 1.190391 |

|   |           |           |           |
|---|-----------|-----------|-----------|
| 6 | -2.301582 | 6.189794  | 3.530198  |
| 1 | -2.380822 | 6.073978  | 4.623543  |
| 1 | -1.852239 | 7.180277  | 3.355623  |
| 6 | -4.405799 | 4.800666  | 3.272014  |
| 6 | -4.872294 | 4.830204  | 4.736946  |
| 1 | -5.396046 | 3.897309  | 4.992619  |
| 1 | -4.027297 | 4.933585  | 5.431949  |
| 1 | -5.565744 | 5.669682  | 4.902327  |
| 6 | -5.641441 | 4.688727  | 2.365161  |
| 1 | -5.349521 | 4.555570  | 1.312201  |
| 1 | -6.294140 | 3.850956  | 2.646938  |
| 1 | -6.238664 | 5.610542  | 2.442643  |
| 6 | -3.684161 | 6.107378  | 2.911186  |
| 1 | -3.597321 | 6.170967  | 1.812511  |
| 1 | -4.308273 | 6.958953  | 3.225916  |
| 6 | -3.695157 | -4.397597 | 1.500874  |
| 6 | 1.503930  | 0.097007  | -2.171899 |
| 6 | 1.109673  | 1.396175  | -2.869364 |
| 6 | 1.263037  | 2.704543  | -2.452308 |
| 1 | 1.587628  | 2.903246  | -1.428782 |
| 6 | 1.001826  | 3.779682  | -3.321901 |
| 6 | 0.540419  | 3.510044  | -4.628961 |
| 6 | 0.303834  | 2.178533  | -5.011510 |
| 1 | -0.089256 | 1.959983  | -6.005833 |

|   |           |           |           |
|---|-----------|-----------|-----------|
| 6 | 0.572534  | 1.131310  | -4.139595 |
| 6 | 0.382877  | -0.321390 | -4.263248 |
| 6 | -0.203067 | -1.095579 | -5.253592 |
| 1 | -0.584380 | -0.613784 | -6.156029 |
| 6 | -0.326100 | -2.487357 | -5.102289 |
| 6 | 0.194718  | -3.102482 | -3.941927 |
| 6 | 0.783008  | -2.301287 | -2.946211 |
| 1 | 1.163493  | -2.761688 | -2.030326 |
| 6 | 0.860040  | -0.929963 | -3.092792 |
| 6 | 1.185565  | 5.195081  | -2.761656 |
| 6 | 2.542890  | 5.337612  | -2.056279 |
| 1 | 2.700339  | 6.389203  | -1.770217 |
| 1 | 2.599574  | 4.736898  | -1.137267 |
| 1 | 3.367132  | 5.032908  | -2.719074 |
| 6 | 0.065999  | 5.442716  | -1.738394 |
| 1 | -0.922018 | 5.444087  | -2.218257 |
| 1 | 0.050669  | 4.647333  | -0.980724 |
| 1 | 0.212710  | 6.408650  | -1.227647 |
| 6 | 1.114607  | 6.258208  | -3.869943 |
| 1 | 0.915833  | 7.236066  | -3.401455 |
| 1 | 2.098249  | 6.349834  | -4.357555 |
| 6 | 0.341890  | 4.629359  | -5.654021 |
| 6 | -0.828855 | 4.347114  | -6.604795 |
| 1 | -0.606945 | 3.531609  | -7.307098 |

|   |           |           |           |
|---|-----------|-----------|-----------|
| 1 | -1.739475 | 4.077777  | -6.051230 |
| 1 | -1.041442 | 5.244693  | -7.205625 |
| 6 | 1.623520  | 4.744817  | -6.499485 |
| 1 | 1.792296  | 3.811244  | -7.056266 |
| 1 | 1.535150  | 5.569986  | -7.224384 |
| 1 | 2.511610  | 4.918346  | -5.876772 |
| 6 | 0.057764  | 5.945365  | -4.914912 |
| 1 | -0.013508 | 6.764580  | -5.649452 |
| 1 | -0.928797 | 5.862171  | -4.427590 |
| 6 | -0.996365 | -3.278708 | -6.231513 |
| 6 | -2.286021 | -2.588272 | -6.700263 |
| 1 | -2.956609 | -2.392847 | -5.850566 |
| 1 | -2.089945 | -1.634545 | -7.209421 |
| 1 | -2.812767 | -3.239444 | -7.414914 |
| 6 | -0.025270 | -3.369459 | -7.421203 |
| 1 | 0.248004  | -2.363847 | -7.773315 |
| 1 | 0.905406  | -3.886058 | -7.147112 |
| 1 | -0.493072 | -3.912074 | -8.257783 |
| 6 | -1.374145 | -4.686379 | -5.746837 |
| 1 | -2.268027 | -4.614138 | -5.105412 |
| 1 | -1.666192 | -5.294099 | -6.618349 |
| 6 | 0.104272  | -4.610079 | -3.685985 |
| 6 | -0.970956 | -4.856595 | -2.615033 |
| 1 | -1.960495 | -4.508451 | -2.943988 |

|   |           |           |           |
|---|-----------|-----------|-----------|
| 1 | -1.038350 | -5.929139 | -2.371774 |
| 1 | -0.724417 | -4.308019 | -1.694761 |
| 6 | 1.442339  | -5.166219 | -3.176143 |
| 1 | 1.384460  | -6.263952 | -3.113872 |
| 1 | 2.262973  | -4.902606 | -3.859715 |
| 1 | 1.695902  | -4.793703 | -2.174033 |
| 6 | -0.249521 | -5.357444 | -4.979604 |
| 1 | 0.648908  | -5.416416 | -5.616074 |
| 1 | -0.517828 | -6.395662 | -4.726074 |
| 6 | -3.103810 | -5.236228 | 2.647361  |
| 1 | -3.695888 | -5.142899 | 3.568598  |
| 1 | -3.064683 | -6.299461 | 2.362636  |
| 1 | -2.080566 | -4.904717 | 2.877976  |
| 6 | -2.839903 | -4.612059 | 0.244422  |
| 1 | -3.129249 | -3.913357 | -0.554820 |
| 1 | -1.768229 | -4.475477 | 0.444422  |
| 1 | -2.973841 | -5.639977 | -0.127649 |
| 6 | -5.123299 | -4.862972 | 1.183000  |
| 1 | -5.418442 | -4.459154 | 0.200400  |
| 1 | -5.123571 | -5.959987 | 1.080267  |
| 6 | -6.249960 | -2.896250 | 2.327029  |
| 6 | -7.004895 | -2.565864 | 3.623122  |
| 1 | -7.271142 | -1.502147 | 3.693986  |
| 1 | -7.942215 | -3.142228 | 3.660005  |

|   |           |           |           |
|---|-----------|-----------|-----------|
| 1 | -6.403368 | -2.829304 | 4.505563  |
| 6 | -7.062361 | -2.364527 | 1.133170  |
| 1 | -6.577053 | -2.600641 | 0.175614  |
| 1 | -8.072576 | -2.803128 | 1.131068  |
| 1 | -7.163412 | -1.270657 | 1.189941  |
| 6 | -6.122696 | -4.424333 | 2.237998  |
| 1 | -5.816837 | -4.815666 | 3.222265  |
| 6 | -3.099321 | 0.632229  | -0.315737 |
| 1 | -3.950673 | 0.458316  | 0.335387  |
| 6 | -2.554500 | 1.501813  | -1.118611 |
| 6 | -2.760632 | 2.853300  | -1.623057 |
| 6 | -3.210305 | 3.849819  | -0.741592 |
| 1 | -3.275932 | 3.621874  | 0.326035  |
| 6 | -3.566955 | 5.102772  | -1.223905 |
| 1 | -3.904177 | 5.862285  | -0.513907 |
| 6 | -3.516611 | 5.404240  | -2.594819 |
| 6 | -3.052856 | 4.404389  | -3.456742 |
| 1 | -3.000549 | 4.596293  | -4.526796 |
| 6 | -2.650441 | 3.155134  | -2.982106 |
| 1 | -2.274021 | 2.394758  | -3.670996 |
| 6 | -3.914639 | 6.800137  | -3.083048 |
| 6 | -5.315070 | 7.154525  | -2.557451 |
| 1 | -6.058763 | 6.423929  | -2.908404 |
| 1 | -5.612000 | 8.151585  | -2.916744 |

|    |           |           |           |
|----|-----------|-----------|-----------|
| 1  | -5.348273 | 7.172058  | -1.459022 |
| 6  | -2.892952 | 7.819207  | -2.549524 |
| 1  | -2.839298 | 7.794846  | -1.450695 |
| 1  | -3.172672 | 8.838652  | -2.857533 |
| 1  | -1.886422 | 7.604459  | -2.940433 |
| 6  | -3.940072 | 6.887960  | -4.612403 |
| 1  | -2.946369 | 6.708231  | -5.048940 |
| 1  | -4.259669 | 7.894859  | -4.918171 |
| 1  | -4.644427 | 6.161700  | -5.044684 |
| 33 | -1.623236 | -0.236785 | -1.232595 |
| 1  | -7.117763 | -4.850156 | 2.031871  |

---

**Table S30**

**[Sb-Prod]<sup>1</sup>**

E : -3499.44168545 Hartree

G : -3497.897404 Hartree

---

| Atomic | Coordinates (Angstroms) |           |           |
|--------|-------------------------|-----------|-----------|
| Number | X                       | Y         | Z         |
| 6      | -0.014519               | -0.019582 | -0.001950 |
| 6      | 0.009216                | -0.065341 | 1.408534  |
| 6      | 1.223571                | -0.007795 | 2.119132  |

|   |           |           |           |
|---|-----------|-----------|-----------|
| 6 | 2.438986  | 0.134176  | 1.461080  |
| 1 | 3.376474  | 0.179183  | 2.023126  |
| 6 | 2.438703  | 0.176224  | 0.072228  |
| 6 | 1.238005  | 0.078698  | -0.646966 |
| 6 | -0.429745 | -0.546272 | 3.732593  |
| 1 | -0.920179 | -0.122898 | 4.621245  |
| 1 | -0.519936 | -1.640800 | 3.795646  |
| 6 | 1.062728  | -0.174373 | 3.620497  |
| 6 | 1.415265  | 1.102712  | 4.395685  |
| 1 | 1.353094  | 0.914319  | 5.478567  |
| 1 | 2.442179  | 1.425872  | 4.165059  |
| 1 | 0.731680  | 1.927329  | 4.160772  |
| 6 | 1.945784  | -1.318559 | 4.135040  |
| 1 | 1.720017  | -1.528508 | 5.192057  |
| 1 | 1.776101  | -2.236588 | 3.553533  |
| 1 | 3.013268  | -1.059755 | 4.064221  |
| 6 | 3.089651  | -0.043067 | -2.203036 |
| 1 | 3.298710  | -1.098204 | -2.430667 |
| 1 | 3.533783  | 0.560171  | -3.007858 |
| 6 | 3.667540  | 0.289444  | -0.810236 |
| 6 | 4.269829  | 1.700221  | -0.748542 |
| 1 | 5.174016  | 1.754567  | -1.374319 |
| 1 | 3.564104  | 2.458335  | -1.111057 |
| 1 | 4.551031  | 1.956802  | 0.284281  |

|   |           |           |           |
|---|-----------|-----------|-----------|
| 6 | 4.742001  | -0.727254 | -0.408753 |
| 1 | 5.569224  | -0.715810 | -1.135156 |
| 1 | 5.162491  | -0.492732 | 0.580987  |
| 1 | 4.325407  | -1.744707 | -0.372599 |
| 6 | -1.143262 | -0.089452 | 2.416605  |
| 6 | -1.811926 | 1.271928  | 2.602896  |
| 6 | -1.256884 | 2.536776  | 2.627812  |
| 1 | -0.189435 | 2.655802  | 2.428771  |
| 6 | -2.045603 | 3.673601  | 2.896257  |
| 6 | -3.440000 | 3.520585  | 3.053647  |
| 6 | -3.996574 | 2.229639  | 3.002151  |
| 1 | -5.075655 | 2.102102  | 3.111640  |
| 6 | -3.196107 | 1.117917  | 2.785498  |
| 6 | -3.533874 | -0.295580 | 2.559488  |
| 6 | -4.751808 | -0.957976 | 2.544853  |
| 1 | -5.663621 | -0.411224 | 2.794588  |
| 6 | -4.829940 | -2.316077 | 2.191816  |
| 6 | -3.646655 | -3.005533 | 1.845799  |
| 6 | -2.415136 | -2.323910 | 1.892756  |
| 1 | -1.490557 | -2.851489 | 1.643542  |
| 6 | -2.356472 | -0.984581 | 2.228147  |
| 6 | -1.327330 | 5.024495  | 3.005547  |
| 6 | -0.142394 | 4.915741  | 3.978852  |
| 1 | 0.285946  | 5.915081  | 4.153114  |

|   |           |           |           |
|---|-----------|-----------|-----------|
| 1 | -0.464879 | 4.503987  | 4.947010  |
| 1 | 0.660553  | 4.277122  | 3.583636  |
| 6 | -0.786042 | 5.436128  | 1.628477  |
| 1 | -1.589198 | 5.588219  | 0.892677  |
| 1 | -0.206588 | 6.369646  | 1.708495  |
| 1 | -0.121287 | 4.657055  | 1.228073  |
| 6 | -2.279919 | 6.102765  | 3.543196  |
| 1 | -2.369903 | 5.994313  | 4.636373  |
| 1 | -1.829058 | 7.092316  | 3.366930  |
| 6 | -4.381421 | 4.711065  | 3.267981  |
| 6 | -4.844368 | 4.733544  | 4.734374  |
| 1 | -5.375440 | 3.802843  | 4.982941  |
| 1 | -3.997348 | 4.823451  | 5.428724  |
| 1 | -5.530382 | 5.577542  | 4.907960  |
| 6 | -5.620328 | 4.608314  | 2.364835  |
| 1 | -5.333637 | 4.486417  | 1.309214  |
| 1 | -6.273217 | 3.769147  | 2.641955  |
| 1 | -6.216228 | 5.529899  | 2.454137  |
| 6 | -3.656590 | 6.017095  | 2.911327  |
| 1 | -3.559979 | 6.076680  | 1.813225  |
| 1 | -4.283903 | 6.869391  | 3.217769  |
| 6 | -3.635132 | -4.486316 | 1.453405  |
| 6 | 1.533236  | 0.137744  | -2.148459 |
| 6 | 1.098963  | 1.422182  | -2.850500 |

|   |           |           |           |
|---|-----------|-----------|-----------|
| 6 | 1.236132  | 2.738306  | -2.451909 |
| 1 | 1.581314  | 2.956605  | -1.439472 |
| 6 | 0.931450  | 3.797896  | -3.326626 |
| 6 | 0.439660  | 3.505260  | -4.617538 |
| 6 | 0.222141  | 2.165183  | -4.979702 |
| 1 | -0.190674 | 1.927446  | -5.961624 |
| 6 | 0.539159  | 1.134238  | -4.105888 |
| 6 | 0.381216  | -0.323154 | -4.215627 |
| 6 | -0.213925 | -1.118768 | -5.182869 |
| 1 | -0.633829 | -0.653543 | -6.076859 |
| 6 | -0.297332 | -2.512551 | -5.018841 |
| 6 | 0.273436  | -3.107152 | -3.871517 |
| 6 | 0.860767  | -2.283111 | -2.893070 |
| 1 | 1.278526  | -2.726895 | -1.985106 |
| 6 | 0.900796  | -0.910905 | -3.051957 |
| 6 | 1.101409  | 5.224174  | -2.791716 |
| 6 | 2.458139  | 5.397124  | -2.092498 |
| 1 | 2.603855  | 6.456606  | -1.830566 |
| 1 | 2.522941  | 4.818806  | -1.159775 |
| 1 | 3.285039  | 5.086976  | -2.749356 |
| 6 | -0.019709 | 5.477689  | -1.772080 |
| 1 | -1.008460 | 5.447534  | -2.249283 |
| 1 | -0.017438 | 4.702750  | -0.993241 |
| 1 | 0.109870  | 6.459650  | -1.287566 |

|   |           |           |           |
|---|-----------|-----------|-----------|
| 6 | 1.016730  | 6.261765  | -3.922235 |
| 1 | 0.839304  | 7.252418  | -3.472331 |
| 1 | 1.990880  | 6.329443  | -4.432802 |
| 6 | 0.186651  | 4.603510  | -5.653756 |
| 6 | -1.029875 | 4.291672  | -6.536170 |
| 1 | -0.832101 | 3.474027  | -7.243324 |
| 1 | -1.900858 | 4.010771  | -5.927571 |
| 1 | -1.292985 | 5.179758  | -7.131347 |
| 6 | 1.423837  | 4.706501  | -6.564219 |
| 1 | 1.581549  | 3.756570  | -7.096048 |
| 1 | 1.286167  | 5.503844  | -7.312091 |
| 1 | 2.337723  | 4.916602  | -5.992011 |
| 6 | -0.067750 | 5.936503  | -4.934792 |
| 1 | -0.148795 | 6.740027  | -5.685566 |
| 1 | -1.043355 | 5.874468  | -4.423574 |
| 6 | -0.984882 | -3.326343 | -6.121182 |
| 6 | -2.316638 | -2.679786 | -6.531510 |
| 1 | -2.957385 | -2.512490 | -5.653152 |
| 1 | -2.175820 | -1.717104 | -7.042061 |
| 1 | -2.849758 | -3.345895 | -7.227381 |
| 6 | -0.062646 | -3.381161 | -7.351195 |
| 1 | 0.160366  | -2.366484 | -7.712474 |
| 1 | 0.896096  | -3.865737 | -7.118734 |
| 1 | -0.546944 | -3.938566 | -8.168296 |

|   |           |           |           |
|---|-----------|-----------|-----------|
| 6 | -1.292252 | -4.747117 | -5.625057 |
| 1 | -2.164049 | -4.708245 | -4.951174 |
| 1 | -1.593436 | -5.365069 | -6.486069 |
| 6 | 0.251674  | -4.617460 | -3.616407 |
| 6 | -0.773410 | -4.912288 | -2.509885 |
| 1 | -1.788612 | -4.610472 | -2.804576 |
| 1 | -0.784236 | -5.986718 | -2.266119 |
| 1 | -0.520080 | -4.354806 | -1.596587 |
| 6 | 1.629432  | -5.117590 | -3.156217 |
| 1 | 1.619877  | -6.216838 | -3.095335 |
| 1 | 2.413247  | -4.818579 | -3.867804 |
| 1 | 1.902727  | -4.736113 | -2.162663 |
| 6 | -0.116160 | -5.375432 | -4.899963 |
| 1 | 0.761519  | -5.397068 | -5.567016 |
| 1 | -0.334256 | -6.423987 | -4.641216 |
| 6 | -3.098873 | -5.310127 | 2.637164  |
| 1 | -3.731016 | -5.200108 | 3.529468  |
| 1 | -3.052205 | -6.377777 | 2.370506  |
| 1 | -2.085501 | -4.978920 | 2.908240  |
| 6 | -2.726911 | -4.722420 | 0.239456  |
| 1 | -2.980759 | -4.034966 | -0.581378 |
| 1 | -1.664220 | -4.586348 | 0.483081  |
| 1 | -2.848260 | -5.755063 | -0.123919 |
| 6 | -5.049186 | -4.952389 | 1.078415  |

|   |           |           |           |
|---|-----------|-----------|-----------|
| 1 | -5.298644 | -4.562194 | 0.077815  |
| 1 | -5.048198 | -6.050823 | 0.991632  |
| 6 | -6.217328 | -2.966901 | 2.145709  |
| 6 | -7.037003 | -2.619225 | 3.397129  |
| 1 | -7.304947 | -1.554547 | 3.441245  |
| 1 | -7.976140 | -3.193783 | 3.392551  |
| 1 | -6.482396 | -2.872731 | 4.312614  |
| 6 | -6.963463 | -2.443592 | 0.905670  |
| 1 | -6.427987 | -2.688328 | -0.022494 |
| 1 | -7.973713 | -2.879111 | 0.853405  |
| 1 | -7.062664 | -1.348912 | 0.947851  |
| 6 | -6.093960 | -4.496373 | 2.080539  |
| 1 | -5.836365 | -4.877287 | 3.082581  |
| 6 | -3.292047 | 0.892993  | -0.325592 |
| 1 | -4.122438 | 0.899045  | 0.377885  |
| 6 | -2.732867 | 1.678248  | -1.208362 |
| 6 | -2.916563 | 3.041150  | -1.699145 |
| 6 | -3.260767 | 4.051232  | -0.784685 |
| 1 | -3.266491 | 3.814510  | 0.283371  |
| 6 | -3.585355 | 5.325756  | -1.231335 |
| 1 | -3.838419 | 6.092783  | -0.494634 |
| 6 | -3.600225 | 5.642854  | -2.599574 |
| 6 | -3.248428 | 4.629489  | -3.497566 |
| 1 | -3.253270 | 4.831886  | -4.567349 |

|    |           |           |           |
|----|-----------|-----------|-----------|
| 6  | -2.882675 | 3.355384  | -3.059472 |
| 1  | -2.592635 | 2.583920  | -3.777202 |
| 6  | -3.938779 | 7.067056  | -3.048511 |
| 6  | -5.295260 | 7.488523  | -2.461452 |
| 1  | -6.093033 | 6.811424  | -2.800695 |
| 1  | -5.546653 | 8.510264  | -2.784590 |
| 1  | -5.285777 | 7.477921  | -1.362414 |
| 6  | -2.840298 | 8.016861  | -2.540395 |
| 1  | -2.750687 | 7.977118  | -1.444544 |
| 1  | -3.067802 | 9.054818  | -2.829029 |
| 1  | -1.862681 | 7.745284  | -2.967935 |
| 6  | -4.015680 | 7.184953  | -4.573878 |
| 1  | -3.050683 | 6.952953  | -5.049018 |
| 1  | -4.283991 | 8.214925  | -4.850836 |
| 1  | -4.778454 | 6.511146  | -4.991612 |
| 51 | -1.794424 | -0.292726 | -1.303077 |
| 1  | -7.080467 | -4.920163 | 1.833111  |

---

**Table S31**

**[Bi-Prod]<sup>1</sup>**

E : -3473.76122541 Hartree

G : -3472.218462 Hartree

---

| Atomic<br>Number | Coordinates (Angstroms) |           |           |
|------------------|-------------------------|-----------|-----------|
|                  | X                       | Y         | Z         |
| 6                | -0.007508               | -0.031295 | -0.008278 |
| 6                | -0.013948               | -0.050039 | 1.401237  |
| 6                | 1.186202                | 0.003756  | 2.137131  |
| 6                | 2.418130                | 0.114284  | 1.503396  |
| 1                | 3.343971                | 0.155864  | 2.084746  |
| 6                | 2.447175                | 0.130413  | 0.114147  |
| 6                | 1.258678                | 0.038688  | -0.626157 |
| 6                | -0.509792               | -0.480092 | 3.725019  |
| 1                | -1.012498               | -0.028209 | 4.592569  |
| 1                | -0.616675               | -1.571238 | 3.813899  |
| 6                | 0.990472                | -0.132229 | 3.637300  |
| 6                | 1.346455                | 1.153694  | 4.395843  |
| 1                | 1.256084                | 0.988295  | 5.480555  |
| 1                | 2.383541                | 1.455617  | 4.182714  |
| 1                | 0.682280                | 1.984248  | 4.128673  |
| 6                | 1.844547                | -1.279547 | 4.192333  |
| 1                | 1.593581                | -1.465729 | 5.248172  |
| 1                | 1.672704                | -2.205893 | 3.624763  |
| 1                | 2.917189                | -1.038476 | 4.139007  |
| 6                | 3.136429                | -0.133784 | -2.145838 |
| 1                | 3.330474                | -1.196396 | -2.351745 |

|   |           |           |           |
|---|-----------|-----------|-----------|
| 1 | 3.606820  | 0.447763  | -2.951806 |
| 6 | 3.693575  | 0.212017  | -0.747386 |
| 6 | 4.314718  | 1.615159  | -0.697997 |
| 1 | 5.231267  | 1.646534  | -1.307235 |
| 1 | 3.626637  | 2.376865  | -1.086331 |
| 1 | 4.579867  | 1.885070  | 0.335640  |
| 6 | 4.746185  | -0.812839 | -0.310703 |
| 1 | 5.586951  | -0.824587 | -1.021480 |
| 1 | 5.151223  | -0.568278 | 0.683031  |
| 1 | 4.314527  | -1.823655 | -0.265940 |
| 6 | -1.189496 | -0.046553 | 2.382292  |
| 6 | -1.861556 | 1.318094  | 2.532507  |
| 6 | -1.306085 | 2.582648  | 2.576822  |
| 1 | -0.234324 | 2.701723  | 2.402932  |
| 6 | -2.098358 | 3.718110  | 2.842515  |
| 6 | -3.495776 | 3.566086  | 2.972593  |
| 6 | -4.053361 | 2.277344  | 2.892364  |
| 1 | -5.134188 | 2.149801  | 2.982799  |
| 6 | -3.249840 | 1.166514  | 2.683852  |
| 6 | -3.583009 | -0.249721 | 2.472337  |
| 6 | -4.800159 | -0.913855 | 2.453589  |
| 1 | -5.716470 | -0.361979 | 2.674192  |
| 6 | -4.870817 | -2.280493 | 2.135242  |
| 6 | -3.680270 | -2.977114 | 1.829823  |

|   |           |           |          |
|---|-----------|-----------|----------|
| 6 | -2.450842 | -2.292639 | 1.880878 |
| 1 | -1.520792 | -2.825261 | 1.664985 |
| 6 | -2.398910 | -0.944657 | 2.181820 |
| 6 | -1.381464 | 5.067280  | 2.980962 |
| 6 | -0.207979 | 4.946701  | 3.966540 |
| 1 | 0.216600  | 5.944227  | 4.159536 |
| 1 | -0.541037 | 4.521158  | 4.925109 |
| 1 | 0.600821  | 4.315100  | 3.572162 |
| 6 | -0.823983 | 5.497792  | 1.616319 |
| 1 | -1.617339 | 5.643173  | 0.868549 |
| 1 | -0.258876 | 6.438594  | 1.712875 |
| 1 | -0.141989 | 4.731297  | 1.221530 |
| 6 | -2.340202 | 6.138158  | 3.522606 |
| 1 | -2.444538 | 6.013043  | 4.612706 |
| 1 | -1.885687 | 7.129644  | 3.367762 |
| 6 | -4.438665 | 4.753801  | 3.196691 |
| 6 | -4.916195 | 4.750136  | 4.658756 |
| 1 | -5.452693 | 3.816618  | 4.883959 |
| 1 | -4.075880 | 4.823513  | 5.363089 |
| 1 | -5.601144 | 5.593087  | 4.841632 |
| 6 | -5.669337 | 4.669560  | 2.280670 |
| 1 | -5.374162 | 4.568846  | 1.225296 |
| 1 | -6.324926 | 3.825412  | 2.535401 |
| 1 | -6.265703 | 5.589448  | 2.383409 |

|   |           |           |           |
|---|-----------|-----------|-----------|
| 6 | -3.708667 | 6.065033  | 2.871851  |
| 1 | -3.598174 | 6.143407  | 1.776358  |
| 1 | -4.339004 | 6.912666  | 3.185051  |
| 6 | -3.660288 | -4.469044 | 1.482031  |
| 6 | 1.583417  | 0.075629  | -2.122407 |
| 6 | 1.178793  | 1.361160  | -2.838610 |
| 6 | 1.308131  | 2.675588  | -2.433428 |
| 1 | 1.641431  | 2.889672  | -1.416239 |
| 6 | 0.998087  | 3.737521  | -3.302917 |
| 6 | 0.511816  | 3.449893  | -4.597054 |
| 6 | 0.310850  | 2.110067  | -4.969824 |
| 1 | -0.098135 | 1.875377  | -5.954105 |
| 6 | 0.631821  | 1.076922  | -4.100336 |
| 6 | 0.462344  | -0.379307 | -4.209023 |
| 6 | -0.127609 | -1.171396 | -5.182108 |
| 1 | -0.518511 | -0.705470 | -6.088733 |
| 6 | -0.242997 | -2.562528 | -5.009016 |
| 6 | 0.286115  | -3.158451 | -3.842914 |
| 6 | 0.868842  | -2.337385 | -2.857430 |
| 1 | 1.257831  | -2.781238 | -1.936820 |
| 6 | 0.947253  | -0.967911 | -3.029246 |
| 6 | 1.145018  | 5.161015  | -2.755896 |
| 6 | 2.487381  | 5.344123  | -2.032203 |
| 1 | 2.616566  | 6.403452  | -1.761268 |

|   |           |           |           |
|---|-----------|-----------|-----------|
| 1 | 2.542738  | 4.760817  | -1.102052 |
| 1 | 3.328950  | 5.047553  | -2.676551 |
| 6 | 0.003266  | 5.393557  | -1.754199 |
| 1 | -0.977336 | 5.354726  | -2.247539 |
| 1 | 0.002174  | 4.611946  | -0.981920 |
| 1 | 0.112100  | 6.372947  | -1.259378 |
| 6 | 1.069437  | 6.202706  | -3.882477 |
| 1 | 0.891437  | 7.192377  | -3.430383 |
| 1 | 2.047201  | 6.269112  | -4.386633 |
| 6 | 0.243220  | 4.552105  | -5.625608 |
| 6 | -0.983593 | 4.238040  | -6.493069 |
| 1 | -0.793527 | 3.421786  | -7.203981 |
| 1 | -1.845092 | 3.955385  | -5.871729 |
| 1 | -1.256689 | 5.126445  | -7.083427 |
| 6 | 1.469289  | 4.664795  | -6.549469 |
| 1 | 1.631489  | 3.715518  | -7.081182 |
| 1 | 1.315604  | 5.459110  | -7.297360 |
| 1 | 2.386676  | 4.886045  | -5.986992 |
| 6 | -0.010325 | 5.882606  | -4.901582 |
| 1 | -0.086799 | 6.688838  | -5.650008 |
| 1 | -0.988355 | 5.821298  | -4.395368 |
| 6 | -0.917440 | -3.372002 | -6.122573 |
| 6 | -2.223226 | -2.702111 | -6.576516 |
| 1 | -2.886074 | -2.513925 | -5.718903 |

|   |           |           |           |
|---|-----------|-----------|-----------|
| 1 | -2.048441 | -1.747402 | -7.091446 |
| 1 | -2.749954 | -3.363748 | -7.281344 |
| 6 | 0.037641  | -3.457351 | -7.325561 |
| 1 | 0.292220  | -2.450975 | -7.689113 |
| 1 | 0.978949  | -3.959860 | -7.061959 |
| 1 | -0.435310 | -4.011987 | -8.151087 |
| 6 | -1.267852 | -4.781328 | -5.622467 |
| 1 | -2.156071 | -4.718457 | -4.972120 |
| 1 | -1.559596 | -5.400600 | -6.485715 |
| 6 | 0.227897  | -4.665852 | -3.576279 |
| 6 | -0.828839 | -4.931106 | -2.492511 |
| 1 | -1.830726 | -4.612309 | -2.814350 |
| 1 | -0.867980 | -6.002951 | -2.240833 |
| 1 | -0.585486 | -4.373012 | -1.576884 |
| 6 | 1.584016  | -5.189123 | -3.078809 |
| 1 | 1.551408  | -6.287461 | -3.010857 |
| 1 | 2.390705  | -4.910586 | -3.772881 |
| 1 | 1.840393  | -4.806029 | -2.081402 |
| 6 | -0.124107 | -5.427432 | -4.862160 |
| 1 | 0.769203  | -5.473543 | -5.506700 |
| 1 | -0.370648 | -6.468733 | -4.599933 |
| 6 | -3.142019 | -5.256285 | 2.698221  |
| 1 | -3.788814 | -5.120291 | 3.576320  |
| 1 | -3.089806 | -6.331474 | 2.464846  |

|   |           |           |           |
|---|-----------|-----------|-----------|
| 1 | -2.133709 | -4.915101 | 2.975663  |
| 6 | -2.732694 | -4.739536 | 0.290457  |
| 1 | -2.980507 | -4.081301 | -0.555751 |
| 1 | -1.674498 | -4.587697 | 0.544407  |
| 1 | -2.842494 | -5.784214 | -0.040859 |
| 6 | -5.067012 | -4.949660 | 1.097723  |
| 1 | -5.300520 | -4.590719 | 0.081617  |
| 1 | -5.062749 | -6.050258 | 1.044633  |
| 6 | -6.256291 | -2.934890 | 2.082934  |
| 6 | -7.100500 | -2.550899 | 3.307135  |
| 1 | -7.371396 | -1.486106 | 3.313160  |
| 1 | -8.038241 | -3.127751 | 3.302420  |
| 1 | -6.562952 | -2.774479 | 4.240405  |
| 6 | -6.979429 | -2.451013 | 0.813626  |
| 1 | -6.425719 | -2.722249 | -0.096305 |
| 1 | -7.987892 | -2.889915 | 0.754925  |
| 1 | -7.081014 | -1.355693 | 0.821091  |
| 6 | -6.129519 | -4.465347 | 2.067312  |
| 1 | -5.888273 | -4.814386 | 3.084916  |
| 6 | -3.461416 | 0.866225  | -0.445288 |
| 1 | -4.299344 | 0.793222  | 0.244771  |
| 6 | -2.897201 | 1.698151  | -1.264892 |
| 6 | -3.023596 | 3.072373  | -1.734914 |
| 6 | -3.310247 | 4.091237  | -0.810725 |

|    |           |           |           |
|----|-----------|-----------|-----------|
| 1  | -3.327107 | 3.845967  | 0.254773  |
| 6  | -3.565146 | 5.385609  | -1.246555 |
| 1  | -3.776246 | 6.158334  | -0.502673 |
| 6  | -3.561078 | 5.717665  | -2.610919 |
| 6  | -3.265846 | 4.695126  | -3.519265 |
| 1  | -3.255679 | 4.907231  | -4.587441 |
| 6  | -2.972551 | 3.399230  | -3.092596 |
| 1  | -2.722450 | 2.620095  | -3.817095 |
| 6  | -3.816149 | 7.163803  | -3.044557 |
| 6  | -5.147998 | 7.656063  | -2.456360 |
| 1  | -5.982344 | 7.030314  | -2.806100 |
| 1  | -5.338710 | 8.694441  | -2.767798 |
| 1  | -5.143025 | 7.631781  | -1.357500 |
| 6  | -2.666234 | 8.042813  | -2.523048 |
| 1  | -2.584355 | 7.988109  | -1.427172 |
| 1  | -2.830608 | 9.094934  | -2.803213 |
| 1  | -1.704372 | 7.717120  | -2.948636 |
| 6  | -3.880771 | 7.302596  | -4.568668 |
| 1  | -2.928973 | 7.020047  | -5.043034 |
| 1  | -4.087962 | 8.349329  | -4.835052 |
| 1  | -4.679799 | 6.678660  | -4.996031 |
| 83 | -1.810876 | -0.322922 | -1.449194 |
| 1  | -7.110870 | -4.898947 | 1.816337  |
